# Supplementary material for: MYO5A Frameshift Variant in a Miniature Dachshund with Coat Color Dilution and Neurological Defects Resembling Human Griscelli Syndrome Type 1
Source: Genes (Basel). 2021 Sep 23;12(10):1479. doi: 10.3390/genes12101479 (PMC8535926; doi:10.3390/genes12101479)
Supplement: Supplementary file 1 [file genes-12-01479-s001.zip › S2_Table_Private_Homozygous_Variants.xlsx]

## Sheet: Private homozygous variants
Table S2. Private variants in the sequenced dog affected with coat color dilution and neurological defects. Private variants were obtained by filtering all variants that were present at least once in 795 control genomes. This resulted in 1'688 homozygous variants for the affected dog. Please note that variants are listed multiple times, if they have predicted effects on more than one transcript.
#CHROM	POS	REF	ALT	FILTER	EFFECT	IMPACT	GENE	GENEID	FEATURE	FEATUREID	BIOTYPE	RANK	HGVS_C	HGVS_P
1	6869698	T	TTTTTG	PASS	downstream_gene_variant	MODIFIER	LOC100685755	100685755	transcript	100685755	pseudogene	-1	n.*2933_*2934insCAAAA
1	6869698	T	TTTTTG	PASS	intergenic_region	MODIFIER	LOC100685678-LOC100685755	100685678-100685755	intergenic_region	100685678-100685755		-1	n.6869698_6869699insTTTTG
1	11243177	T	TC	PASS	intron_variant	MODIFIER	LOC102154255	102154255	transcript	XR_002622159.1	pseudogene	5	n.644+5457_644+5458insG
1	11243177	T	TC	PASS	intron_variant	MODIFIER	LOC102154255	102154255	transcript	XR_002622172.1	pseudogene	5	n.622+5457_622+5458insG
1	11243177	T	TC	PASS	intron_variant	MODIFIER	LOC102154255	102154255	transcript	XR_291199.2	pseudogene	4	n.561+5457_561+5458insG
1	13073272	G	A	PASS	intergenic_region	MODIFIER	LOC111093811-LOC607205	111093811-607205	intergenic_region	111093811-607205		-1	n.13073272G>A
1	42178425	C	A	PASS	intron_variant	MODIFIER	ESR1	403640	transcript	NM_001286958.1	protein_coding	4	c.763+17456C>A
1	42178425	C	A	PASS	intron_variant	MODIFIER	ESR1	403640	transcript	XM_014113908.2	protein_coding	4	c.763+17456C>A
1	56094456	G	A	PASS	intergenic_region	MODIFIER	SMOC2-LOC102153755	476270-102153755	intergenic_region	476270-102153755		-1	n.56094456G>A
1	56407885	C	G	PASS	intron_variant	MODIFIER	THBS2	484087	transcript	NM_001197156.3	protein_coding	17	c.2591-130G>C
1	60242168	C	CTCTCTCA	PASS	intergenic_region	MODIFIER	LOC111096174-LOC111089986	111096174-111089986	intergenic_region	111096174-111089986		-1	n.60242168_60242169insTCTCTCA
1	63641576	C	CTTCTTCTTCTTCTTCTTCTTCTTCTTCTTCTTTTCTTCT	PASS	intron_variant	MODIFIER	NKAIN2	100688012	transcript	XM_014113513.2	protein_coding	3	c.241-48355_241-48354insTTCTTCTTCTTCTTCTTCTTCTTCTTCTTCTTTTCTTCT
1	63641576	C	CTTCTTCTTCTTCTTCTTCTTCTTCTTCTTCTTTTCTTCT	PASS	intron_variant	MODIFIER	NKAIN2	100688012	transcript	XM_022419659.1	protein_coding	3	c.241-48355_241-48354insTTCTTCTTCTTCTTCTTCTTCTTCTTCTTCTTTTCTTCT
1	65555135	C	CCGCA	PASS	intergenic_region	MODIFIER	LOC111090705-LOC100684456	111090705-100684456	intergenic_region	111090705-100684456		-1	n.65555135_65555136insCGCA
1	65641493	C	A	PASS	intergenic_region	MODIFIER	LOC100684456-LOC102153070	100684456-102153070	intergenic_region	100684456-102153070		-1	n.65641493C>A
1	88517904	A	G	PASS	upstream_gene_variant	MODIFIER	LOC111096775	111096775	transcript	XR_002628659.1	pseudogene	-1	n.-1347A>G
1	88517904	A	G	PASS	upstream_gene_variant	MODIFIER	LOC111096775	111096775	transcript	XR_002628658.1	pseudogene	-1	n.-1345A>G
1	88517904	A	G	PASS	intron_variant	MODIFIER	PIP5K1B	476331	transcript	XM_014117668.2	protein_coding	4	c.70-20106T>C
1	88517904	A	G	PASS	intron_variant	MODIFIER	PIP5K1B	476331	transcript	XM_005615885.3	protein_coding	1	c.-91+12602T>C
1	88517904	A	G	PASS	intron_variant	MODIFIER	PIP5K1B	476331	transcript	XM_014117673.2	protein_coding	1	c.64-20106T>C
1	88517904	A	G	PASS	intron_variant	MODIFIER	PIP5K1B	476331	transcript	XM_022421438.1	protein_coding	3	c.70-20106T>C
1	88517904	A	G	PASS	intron_variant	MODIFIER	PIP5K1B	476331	transcript	XM_022421435.1	protein_coding	3	c.70-20106T>C
1	88517904	A	G	PASS	intron_variant	MODIFIER	PIP5K1B	476331	transcript	XM_005615884.3	protein_coding	4	c.70-20106T>C
1	100325242	G	A	PASS	intergenic_region	MODIFIER	LOC100686546-LOC100684902	100686546-100684902	intergenic_region	100686546-100684902		-1	n.100325242G>A
1	110800284	C	CTTTTTCTTTCTTTCTTTCTT	PASS	upstream_gene_variant	MODIFIER	CEACAM20	476441	transcript	XM_005616468.3	protein_coding	-1	c.-8671_-8670insTTTTTCTTTCTTTCTTTCTT
1	110800284	C	CTTTTTCTTTCTTTCTTTCTT	PASS	upstream_gene_variant	MODIFIER	CEACAM20	476441	transcript	XM_022425042.1	protein_coding	-1	c.-8671_-8670insTTTTTCTTTCTTTCTTTCTT
1	110800284	C	CTTTTTCTTTCTTTCTTTCTT	PASS	intron_variant	MODIFIER	CEACAM20	476441	transcript	XM_022425050.1	protein_coding	1	c.-14-8657_-14-8656insTTTTTCTTTCTTTCTTTCTT
1	118220748	C	T	PASS	intron_variant	MODIFIER	LOC111098296	111098296	transcript	XR_002631972.1	pseudogene	1	n.88-2786C>T
1	118220748	C	T	PASS	intron_variant	MODIFIER	LOC111098296	111098296	transcript	XR_002631983.1	pseudogene	1	n.88-2786C>T
1	118220767	T	TTC	PASS	intron_variant	MODIFIER	LOC111098296	111098296	transcript	XR_002631972.1	pseudogene	1	n.88-2767_88-2766insTC
1	118220767	T	TTC	PASS	intron_variant	MODIFIER	LOC111098296	111098296	transcript	XR_002631983.1	pseudogene	1	n.88-2767_88-2766insTC
1	118582217	C	G	PASS	intergenic_region	MODIFIER	CHST8-LOC106559950	484596-106559950	intergenic_region	484596-106559950		-1	n.118582217C>G
1	119941725	TC	T	PASS	intron_variant	MODIFIER	LOC111098384	111098384	transcript	XR_002632144.1	pseudogene	1	n.1085-5161delC
1	119941727	TAC	T	PASS	intron_variant	MODIFIER	LOC111098384	111098384	transcript	XR_002632144.1	pseudogene	1	n.1085-5159_1085-5158delAC
1	119941735	TC	T	PASS	intron_variant	MODIFIER	LOC111098384	111098384	transcript	XR_002632144.1	pseudogene	1	n.1085-5151delC
1	121895774	A	C	PASS	intergenic_region	MODIFIER	VSTM2B-LOC111090842	484614-111090842	intergenic_region	484614-111090842		-1	n.121895774A>C
10	1879781	C	G	PASS	upstream_gene_variant	MODIFIER	AVIL	474420	transcript	XM_022424105.1	protein_coding	-1	c.-7497G>C
10	1879781	C	G	PASS	upstream_gene_variant	MODIFIER	AVIL	474420	transcript	XM_014117199.2	protein_coding	-1	c.-7497G>C
10	1879781	C	G	PASS	upstream_gene_variant	MODIFIER	AVIL	474420	transcript	XM_022424106.1	protein_coding	-1	c.-7497G>C
10	1879781	C	G	PASS	downstream_gene_variant	MODIFIER	MIR26A-2	100885871	transcript	NR_049221.1	pseudogene	-1	n.*732G>C
10	1879781	C	G	PASS	downstream_gene_variant	MODIFIER	MIR26A-2	100885871	transcript	TRANSCRIPT_100885871	pseudogene	-1	n.*770G>C
10	1879781	C	G	PASS	intron_variant	MODIFIER	CTDSP2	481135	transcript	XM_538256.6	protein_coding	6	c.505-87G>C
10	1879781	C	G	PASS	intron_variant	MODIFIER	CTDSP2	481135	transcript	XM_022424107.1	protein_coding	6	c.502-87G>C
10	13205687	G	T	PASS	intron_variant	MODIFIER	ZFC3H1	474449	transcript	XM_531679.6	protein_coding	2	c.1030+3940C>A
10	26442144	T	G	PASS	intron_variant	MODIFIER	TMEM184B	481254	transcript	XM_005625888.3	protein_coding	1	c.-57-6488T>G
10	26442144	T	G	PASS	intron_variant	MODIFIER	TMEM184B	481254	transcript	XM_538375.6	protein_coding	1	c.-57-6488T>G
10	34247261	T	G	PASS	upstream_gene_variant	MODIFIER	SOWAHC	481302	transcript	XM_005625964.3	protein_coding	-1	c.-324A>C
10	34247261	T	G	PASS	upstream_gene_variant	MODIFIER	2010-09-01	100688206	transcript	XM_022424528.1	protein_coding	-1	c.-17336T>G
10	34247261	T	G	PASS	upstream_gene_variant	MODIFIER	2010-09-01	100688206	transcript	XM_005625965.3	protein_coding	-1	c.-17336T>G
10	34247261	T	G	PASS	upstream_gene_variant	MODIFIER	2010-09-01	100688206	transcript	XM_005625969.3	protein_coding	-1	c.-17336T>G
10	34247261	T	G	PASS	upstream_gene_variant	MODIFIER	2010-09-01	100688206	transcript	XM_022424529.1	protein_coding	-1	c.-17336T>G
10	34247261	T	G	PASS	upstream_gene_variant	MODIFIER	2010-09-01	100688206	transcript	XM_005625967.3	protein_coding	-1	c.-17336T>G
10	34247261	T	G	PASS	upstream_gene_variant	MODIFIER	2010-09-01	100688206	transcript	XM_005625968.3	protein_coding	-1	c.-17336T>G
10	34247261	T	G	PASS	upstream_gene_variant	MODIFIER	2010-09-01	100688206	transcript	XM_022424530.1	protein_coding	-1	c.-17336T>G
10	34247261	T	G	PASS	upstream_gene_variant	MODIFIER	2010-09-01	100688206	transcript	XM_022424533.1	protein_coding	-1	c.-17336T>G
10	34247261	T	G	PASS	upstream_gene_variant	MODIFIER	2010-09-01	100688206	transcript	XR_002630664.1	pseudogene	-1	n.-912T>G
10	34247261	T	G	PASS	upstream_gene_variant	MODIFIER	2010-09-01	100688206	transcript	XR_002630665.1	pseudogene	-1	n.-912T>G
10	34247261	T	G	PASS	upstream_gene_variant	MODIFIER	2010-09-01	100688206	transcript	XM_022424531.1	protein_coding	-1	c.-17336T>G
10	34247261	T	G	PASS	upstream_gene_variant	MODIFIER	2010-09-01	100688206	transcript	XM_022424532.1	protein_coding	-1	c.-17336T>G
10	34247261	T	G	PASS	intergenic_region	MODIFIER	SOWAHC-SEPT10	481302-100688206	intergenic_region	481302-100688206		-1	n.34247261T>G
10	52815088	C	A	PASS	intergenic_region	MODIFIER	LOC102157367-LOC100683314	102157367-100683314	intergenic_region	102157367-100683314		-1	n.52815088C>A
10	53896596	A	T	PASS	intergenic_region	MODIFIER	LOC100683314-LOC100688606	100683314-100688606	intergenic_region	100683314-100688606		-1	n.53896596A>T
10	54889759	A	AGG	PASS	intron_variant	MODIFIER	PSME4	474594	transcript	XM_005626107.2	protein_coding	40	c.4473+4045_4473+4046insCC
10	57465051	A	T	PASS	intron_variant	MODIFIER	LOC111097758	111097758	transcript	XR_002630836.1	pseudogene	3	n.339+39738A>T
10	57465051	A	T	PASS	intron_variant	MODIFIER	LOC111097758	111097758	transcript	XR_002630838.1	pseudogene	2	n.223+39738A>T
10	57465051	A	T	PASS	intron_variant	MODIFIER	LOC111097758	111097758	transcript	XR_002630837.1	pseudogene	2	n.191+39738A>T
10	58533347	G	T	PASS	intron_variant	MODIFIER	VRK2	474605	transcript	XM_005626121.3	protein_coding	13	c.1179+4109G>T
10	58533347	G	T	PASS	intron_variant	MODIFIER	FANCL	612161	transcript	XM_022424762.1	protein_coding	14	c.1161-8693C>A
10	58533347	G	T	PASS	intron_variant	MODIFIER	FANCL	612161	transcript	XM_022424765.1	protein_coding	14	c.951-8693C>A
10	58533347	G	T	PASS	intron_variant	MODIFIER	FANCL	612161	transcript	XM_022424763.1	protein_coding	14	c.1161-8693C>A
10	58533347	G	T	PASS	intron_variant	MODIFIER	FANCL	612161	transcript	XM_022424764.1	protein_coding	13	c.1092-8693C>A
10	58533347	G	T	PASS	intron_variant	MODIFIER	FANCL	612161	transcript	XM_022424766.1	protein_coding	14	c.951-8693C>A
10	58608171	C	CCT	PASS	intron_variant	MODIFIER	FANCL	612161	transcript	XM_022424762.1	protein_coding	5	c.343-2051_343-2050insAG
10	58608171	C	CCT	PASS	intron_variant	MODIFIER	FANCL	612161	transcript	XM_022424765.1	protein_coding	5	c.133-2051_133-2050insAG
10	58608171	C	CCT	PASS	intron_variant	MODIFIER	FANCL	612161	transcript	XM_022424763.1	protein_coding	5	c.343-2051_343-2050insAG
10	58608171	C	CCT	PASS	intron_variant	MODIFIER	FANCL	612161	transcript	XM_022424764.1	protein_coding	4	c.274-2051_274-2050insAG
10	58608171	C	CCT	PASS	intron_variant	MODIFIER	FANCL	612161	transcript	XM_022424766.1	protein_coding	5	c.133-2051_133-2050insAG
10	58608171	C	CCT	PASS	intron_variant	MODIFIER	FANCL	612161	transcript	XM_014117538.2	protein_coding	5	c.343-2051_343-2050insAG
10	58608171	C	CCT	PASS	intron_variant	MODIFIER	FANCL	612161	transcript	XM_014117539.2	protein_coding	4	c.274-2051_274-2050insAG
10	58728276	A	C	PASS	intergenic_region	MODIFIER	FANCL-LOC111097767	612161-111097767	intergenic_region	612161-111097767		-1	n.58728276A>C
10	58730431	G	T	PASS	intergenic_region	MODIFIER	FANCL-LOC111097767	612161-111097767	intergenic_region	612161-111097767		-1	n.58730431G>T
10	58730557	C	T	GATKstd	intergenic_region	MODIFIER	FANCL-LOC111097767	612161-111097767	intergenic_region	612161-111097767		-1	n.58730557C>T
10	58741749	G	A	GATKstd	upstream_gene_variant	MODIFIER	LOC111097767	111097767	transcript	XR_002630853.1	pseudogene	-1	n.-2289G>A
10	58741749	G	A	GATKstd	intergenic_region	MODIFIER	FANCL-LOC111097767	612161-111097767	intergenic_region	612161-111097767		-1	n.58741749G>A
10	58785159	C	T	GATKstd	intron_variant	MODIFIER	LOC102154536	102154536	transcript	XR_002630849.1	pseudogene	5	n.676+17371G>A
10	58785159	C	T	GATKstd	intron_variant	MODIFIER	LOC102154536	102154536	transcript	XR_002630848.1	pseudogene	4	n.635+17371G>A
10	58787125	T	G	GATKstd	intron_variant	MODIFIER	LOC102154536	102154536	transcript	XR_002630849.1	pseudogene	5	n.676+15405A>C
10	58787125	T	G	GATKstd	intron_variant	MODIFIER	LOC102154536	102154536	transcript	XR_002630848.1	pseudogene	4	n.635+15405A>C
10	58787168	T	TA	PASS	intron_variant	MODIFIER	LOC102154536	102154536	transcript	XR_002630849.1	pseudogene	5	n.676+15361_676+15362insT
10	58787168	T	TA	PASS	intron_variant	MODIFIER	LOC102154536	102154536	transcript	XR_002630848.1	pseudogene	4	n.635+15361_635+15362insT
10	58787819	A	G	GATKstd	intron_variant	MODIFIER	LOC102154536	102154536	transcript	XR_002630849.1	pseudogene	5	n.676+14711T>C
10	58787819	A	G	GATKstd	intron_variant	MODIFIER	LOC102154536	102154536	transcript	XR_002630848.1	pseudogene	4	n.635+14711T>C
10	58789908	TA	T	PASS	intron_variant	MODIFIER	LOC102154536	102154536	transcript	XR_002630849.1	pseudogene	5	n.676+12621delT
10	58789908	TA	T	PASS	intron_variant	MODIFIER	LOC102154536	102154536	transcript	XR_002630848.1	pseudogene	4	n.635+12621delT
10	58791119	A	T	PASS	intron_variant	MODIFIER	LOC102154536	102154536	transcript	XR_002630849.1	pseudogene	5	n.676+11411T>A
10	58791119	A	T	PASS	intron_variant	MODIFIER	LOC102154536	102154536	transcript	XR_002630848.1	pseudogene	4	n.635+11411T>A
10	58791632	G	A	GATKstd	intron_variant	MODIFIER	LOC102154536	102154536	transcript	XR_002630849.1	pseudogene	5	n.676+10898C>T
10	58791632	G	A	GATKstd	intron_variant	MODIFIER	LOC102154536	102154536	transcript	XR_002630848.1	pseudogene	4	n.635+10898C>T
10	58792192	T	C	PASS	intron_variant	MODIFIER	LOC102154536	102154536	transcript	XR_002630849.1	pseudogene	5	n.676+10338A>G
10	58792192	T	C	PASS	intron_variant	MODIFIER	LOC102154536	102154536	transcript	XR_002630848.1	pseudogene	4	n.635+10338A>G
10	58793610	A	G	GATKstd	intron_variant	MODIFIER	LOC102154536	102154536	transcript	XR_002630849.1	pseudogene	5	n.676+8920T>C
10	58793610	A	G	GATKstd	intron_variant	MODIFIER	LOC102154536	102154536	transcript	XR_002630848.1	pseudogene	4	n.635+8920T>C
10	58794284	C	T	GATKstd	intron_variant	MODIFIER	LOC102154536	102154536	transcript	XR_002630849.1	pseudogene	5	n.676+8246G>A
10	58794284	C	T	GATKstd	intron_variant	MODIFIER	LOC102154536	102154536	transcript	XR_002630848.1	pseudogene	4	n.635+8246G>A
10	58794399	C	A	GATKstd	intron_variant	MODIFIER	LOC102154536	102154536	transcript	XR_002630849.1	pseudogene	5	n.676+8131G>T
10	58794399	C	A	GATKstd	intron_variant	MODIFIER	LOC102154536	102154536	transcript	XR_002630848.1	pseudogene	4	n.635+8131G>T
10	58796189	C	T	GATKstd	intron_variant	MODIFIER	LOC102154536	102154536	transcript	XR_002630849.1	pseudogene	5	n.676+6341G>A
10	58796189	C	T	GATKstd	intron_variant	MODIFIER	LOC102154536	102154536	transcript	XR_002630848.1	pseudogene	4	n.635+6341G>A
10	58796842	G	A	GATKstd	intron_variant	MODIFIER	LOC102154536	102154536	transcript	XR_002630849.1	pseudogene	5	n.676+5688C>T
10	58796842	G	A	GATKstd	intron_variant	MODIFIER	LOC102154536	102154536	transcript	XR_002630848.1	pseudogene	4	n.635+5688C>T
10	58802020	GTTAAA	G	PASS	intron_variant	MODIFIER	LOC102154536	102154536	transcript	XR_002630849.1	pseudogene	5	n.676+505_676+509delTTTAA
10	58802020	GTTAAA	G	PASS	intron_variant	MODIFIER	LOC102154536	102154536	transcript	XR_002630848.1	pseudogene	4	n.635+505_635+509delTTTAA
10	58803453	C	T	PASS	intron_variant	MODIFIER	LOC102154536	102154536	transcript	XR_002630849.1	pseudogene	4	n.642-889G>A
10	58803453	C	T	PASS	intron_variant	MODIFIER	LOC102154536	102154536	transcript	XR_002630848.1	pseudogene	3	n.601-889G>A
10	58803800	T	A	PASS	intron_variant	MODIFIER	LOC102154536	102154536	transcript	XR_002630849.1	pseudogene	4	n.642-1236A>T
10	58803800	T	A	PASS	intron_variant	MODIFIER	LOC102154536	102154536	transcript	XR_002630848.1	pseudogene	3	n.601-1236A>T
10	58810128	A	C	PASS	intron_variant	MODIFIER	LOC102154536	102154536	transcript	XR_002630849.1	pseudogene	4	n.641+7056T>G
10	58810128	A	C	PASS	intron_variant	MODIFIER	LOC102154536	102154536	transcript	XR_002630848.1	pseudogene	3	n.601-7564T>G
10	58810719	T	C	PASS	intron_variant	MODIFIER	LOC102154536	102154536	transcript	XR_002630849.1	pseudogene	4	n.641+6465A>G
10	58810719	T	C	PASS	intron_variant	MODIFIER	LOC102154536	102154536	transcript	XR_002630848.1	pseudogene	3	n.601-8155A>G
10	58811817	G	A	GATKstd	intron_variant	MODIFIER	LOC102154536	102154536	transcript	XR_002630849.1	pseudogene	4	n.641+5367C>T
10	58811817	G	A	GATKstd	intron_variant	MODIFIER	LOC102154536	102154536	transcript	XR_002630848.1	pseudogene	3	n.601-9253C>T
10	58813044	G	A	GATKstd	intron_variant	MODIFIER	LOC102154536	102154536	transcript	XR_002630849.1	pseudogene	4	n.641+4140C>T
10	58813044	G	A	GATKstd	intron_variant	MODIFIER	LOC102154536	102154536	transcript	XR_002630848.1	pseudogene	3	n.601-10480C>T
10	58813248	A	G	GATKstd	intron_variant	MODIFIER	LOC102154536	102154536	transcript	XR_002630849.1	pseudogene	4	n.641+3936T>C
10	58813248	A	G	GATKstd	intron_variant	MODIFIER	LOC102154536	102154536	transcript	XR_002630848.1	pseudogene	3	n.601-10684T>C
10	58814891	G	T	GATKstd	intron_variant	MODIFIER	LOC102154536	102154536	transcript	XR_002630849.1	pseudogene	4	n.641+2293C>A
10	58814891	G	T	GATKstd	intron_variant	MODIFIER	LOC102154536	102154536	transcript	XR_002630848.1	pseudogene	3	n.601-12327C>A
10	58814963	C	T	GATKstd	intron_variant	MODIFIER	LOC102154536	102154536	transcript	XR_002630849.1	pseudogene	4	n.641+2221G>A
10	58814963	C	T	GATKstd	intron_variant	MODIFIER	LOC102154536	102154536	transcript	XR_002630848.1	pseudogene	3	n.601-12399G>A
10	58816206	T	C	PASS	intron_variant	MODIFIER	LOC102154536	102154536	transcript	XR_002630849.1	pseudogene	4	n.641+978A>G
10	58816206	T	C	PASS	intron_variant	MODIFIER	LOC102154536	102154536	transcript	XR_002630848.1	pseudogene	3	n.601-13642A>G
10	58817779	A	C	GATKstd	intron_variant	MODIFIER	LOC102154536	102154536	transcript	XR_002630849.1	pseudogene	3	n.605-559T>G
10	58817779	A	C	GATKstd	intron_variant	MODIFIER	LOC102154536	102154536	transcript	XR_002630848.1	pseudogene	3	n.601-15215T>G
10	58829777	A	T	PASS	intron_variant	MODIFIER	LOC102154536	102154536	transcript	XR_002630849.1	pseudogene	3	n.605-12557T>A
10	58829777	A	T	PASS	intron_variant	MODIFIER	LOC102154536	102154536	transcript	XR_002630848.1	pseudogene	3	n.601-27213T>A
10	58830024	T	A	PASS	intron_variant	MODIFIER	LOC102154536	102154536	transcript	XR_002630849.1	pseudogene	3	n.605-12804A>T
10	58830024	T	A	PASS	intron_variant	MODIFIER	LOC102154536	102154536	transcript	XR_002630848.1	pseudogene	3	n.601-27460A>T
10	58830393	G	A	GATKstd	intron_variant	MODIFIER	LOC102154536	102154536	transcript	XR_002630849.1	pseudogene	3	n.605-13173C>T
10	58830393	G	A	GATKstd	intron_variant	MODIFIER	LOC102154536	102154536	transcript	XR_002630848.1	pseudogene	3	n.601-27829C>T
10	58830450	G	A	GATKstd	intron_variant	MODIFIER	LOC102154536	102154536	transcript	XR_002630849.1	pseudogene	3	n.605-13230C>T
10	58830450	G	A	GATKstd	intron_variant	MODIFIER	LOC102154536	102154536	transcript	XR_002630848.1	pseudogene	3	n.601-27886C>T
10	58830593	G	A	GATKstd	intron_variant	MODIFIER	LOC102154536	102154536	transcript	XR_002630849.1	pseudogene	3	n.605-13373C>T
10	58830593	G	A	GATKstd	intron_variant	MODIFIER	LOC102154536	102154536	transcript	XR_002630848.1	pseudogene	3	n.601-28029C>T
10	58830955	C	T	GATKstd	intron_variant	MODIFIER	LOC102154536	102154536	transcript	XR_002630849.1	pseudogene	3	n.605-13735G>A
10	58830955	C	T	GATKstd	intron_variant	MODIFIER	LOC102154536	102154536	transcript	XR_002630848.1	pseudogene	3	n.601-28391G>A
10	58831770	G	A	GATKstd	intron_variant	MODIFIER	LOC102154536	102154536	transcript	XR_002630849.1	pseudogene	3	n.605-14550C>T
10	58831770	G	A	GATKstd	intron_variant	MODIFIER	LOC102154536	102154536	transcript	XR_002630848.1	pseudogene	3	n.600+28800C>T
10	58831938	C	T	GATKstd	intron_variant	MODIFIER	LOC102154536	102154536	transcript	XR_002630849.1	pseudogene	3	n.605-14718G>A
10	58831938	C	T	GATKstd	intron_variant	MODIFIER	LOC102154536	102154536	transcript	XR_002630848.1	pseudogene	3	n.600+28632G>A
10	58832122	G	A	GATKstd	intron_variant	MODIFIER	LOC102154536	102154536	transcript	XR_002630849.1	pseudogene	3	n.605-14902C>T
10	58832122	G	A	GATKstd	intron_variant	MODIFIER	LOC102154536	102154536	transcript	XR_002630848.1	pseudogene	3	n.600+28448C>T
10	58832415	T	C	GATKstd	intron_variant	MODIFIER	LOC102154536	102154536	transcript	XR_002630849.1	pseudogene	3	n.605-15195A>G
10	58832415	T	C	GATKstd	intron_variant	MODIFIER	LOC102154536	102154536	transcript	XR_002630848.1	pseudogene	3	n.600+28155A>G
10	58832456	C	T	GATKstd	intron_variant	MODIFIER	LOC102154536	102154536	transcript	XR_002630849.1	pseudogene	3	n.605-15236G>A
10	58832456	C	T	GATKstd	intron_variant	MODIFIER	LOC102154536	102154536	transcript	XR_002630848.1	pseudogene	3	n.600+28114G>A
10	58836271	T	TA	PASS	intron_variant	MODIFIER	LOC102154536	102154536	transcript	XR_002630849.1	pseudogene	3	n.605-19052_605-19051insT
10	58836271	T	TA	PASS	intron_variant	MODIFIER	LOC102154536	102154536	transcript	XR_002630848.1	pseudogene	3	n.600+24298_600+24299insT
10	58844310	A	G	PASS	upstream_gene_variant	MODIFIER	LOC102154583	102154583	transcript	XR_002630845.1	pseudogene	-1	n.-1222A>G
10	58844310	A	G	PASS	intron_variant	MODIFIER	LOC102154536	102154536	transcript	XR_002630849.1	pseudogene	3	n.604+16260T>C
10	58844310	A	G	PASS	intron_variant	MODIFIER	LOC102154536	102154536	transcript	XR_002630848.1	pseudogene	3	n.600+16260T>C
10	58846755	G	A	PASS	intron_variant	MODIFIER	LOC102154536	102154536	transcript	XR_002630849.1	pseudogene	3	n.604+13815C>T
10	58846755	G	A	PASS	intron_variant	MODIFIER	LOC102154536	102154536	transcript	XR_002630848.1	pseudogene	3	n.600+13815C>T
10	58846755	G	A	PASS	intron_variant	MODIFIER	LOC102154583	102154583	transcript	XR_002630845.1	pseudogene	1	n.91+1133G>A
10	58847439	C	G	GATKstd	intron_variant	MODIFIER	LOC102154536	102154536	transcript	XR_002630849.1	pseudogene	3	n.604+13131G>C
10	58847439	C	G	GATKstd	intron_variant	MODIFIER	LOC102154536	102154536	transcript	XR_002630848.1	pseudogene	3	n.600+13131G>C
10	58847439	C	G	GATKstd	intron_variant	MODIFIER	LOC102154583	102154583	transcript	XR_002630845.1	pseudogene	1	n.91+1817C>G
10	58848300	C	G	GATKstd	intron_variant	MODIFIER	LOC102154536	102154536	transcript	XR_002630849.1	pseudogene	3	n.604+12270G>C
10	58848300	C	G	GATKstd	intron_variant	MODIFIER	LOC102154536	102154536	transcript	XR_002630848.1	pseudogene	3	n.600+12270G>C
10	58848300	C	G	GATKstd	intron_variant	MODIFIER	LOC102154583	102154583	transcript	XR_002630845.1	pseudogene	1	n.91+2678C>G
10	58848668	C	G	GATKstd	intron_variant	MODIFIER	LOC102154536	102154536	transcript	XR_002630849.1	pseudogene	3	n.604+11902G>C
10	58848668	C	G	GATKstd	intron_variant	MODIFIER	LOC102154536	102154536	transcript	XR_002630848.1	pseudogene	3	n.600+11902G>C
10	58848668	C	G	GATKstd	intron_variant	MODIFIER	LOC102154583	102154583	transcript	XR_002630845.1	pseudogene	1	n.91+3046C>G
10	58849074	C	T	GATKstd	intron_variant	MODIFIER	LOC102154536	102154536	transcript	XR_002630849.1	pseudogene	3	n.604+11496G>A
10	58849074	C	T	GATKstd	intron_variant	MODIFIER	LOC102154536	102154536	transcript	XR_002630848.1	pseudogene	3	n.600+11496G>A
10	58849074	C	T	GATKstd	intron_variant	MODIFIER	LOC102154583	102154583	transcript	XR_002630845.1	pseudogene	1	n.91+3452C>T
10	58849676	A	G	GATKstd	intron_variant	MODIFIER	LOC102154536	102154536	transcript	XR_002630849.1	pseudogene	3	n.604+10894T>C
10	58849676	A	G	GATKstd	intron_variant	MODIFIER	LOC102154536	102154536	transcript	XR_002630848.1	pseudogene	3	n.600+10894T>C
10	58849676	A	G	GATKstd	intron_variant	MODIFIER	LOC102154583	102154583	transcript	XR_002630845.1	pseudogene	1	n.91+4054A>G
10	58850473	C	T	PASS	intron_variant	MODIFIER	LOC102154536	102154536	transcript	XR_002630849.1	pseudogene	3	n.604+10097G>A
10	58850473	C	T	PASS	intron_variant	MODIFIER	LOC102154536	102154536	transcript	XR_002630848.1	pseudogene	3	n.600+10097G>A
10	58850473	C	T	PASS	intron_variant	MODIFIER	LOC102154583	102154583	transcript	XR_002630845.1	pseudogene	1	n.91+4851C>T
10	58851036	T	C	GATKstd	intron_variant	MODIFIER	LOC102154536	102154536	transcript	XR_002630849.1	pseudogene	3	n.604+9534A>G
10	58851036	T	C	GATKstd	intron_variant	MODIFIER	LOC102154536	102154536	transcript	XR_002630848.1	pseudogene	3	n.600+9534A>G
10	58851036	T	C	GATKstd	intron_variant	MODIFIER	LOC102154583	102154583	transcript	XR_002630845.1	pseudogene	1	n.91+5414T>C
10	58851198	A	G	GATKstd	intron_variant	MODIFIER	LOC102154536	102154536	transcript	XR_002630849.1	pseudogene	3	n.604+9372T>C
10	58851198	A	G	GATKstd	intron_variant	MODIFIER	LOC102154536	102154536	transcript	XR_002630848.1	pseudogene	3	n.600+9372T>C
10	58851198	A	G	GATKstd	intron_variant	MODIFIER	LOC102154583	102154583	transcript	XR_002630845.1	pseudogene	1	n.91+5576A>G
10	58851635	C	CTACAAT	PASS	intron_variant	MODIFIER	LOC102154536	102154536	transcript	XR_002630849.1	pseudogene	3	n.604+8934_604+8935insATTGTA
10	58851635	C	CTACAAT	PASS	intron_variant	MODIFIER	LOC102154536	102154536	transcript	XR_002630848.1	pseudogene	3	n.600+8934_600+8935insATTGTA
10	58851635	C	CTACAAT	PASS	intron_variant	MODIFIER	LOC102154583	102154583	transcript	XR_002630845.1	pseudogene	1	n.91+6013_91+6014insTACAAT
10	58852211	G	A	GATKstd	intron_variant	MODIFIER	LOC102154536	102154536	transcript	XR_002630849.1	pseudogene	3	n.604+8359C>T
10	58852211	G	A	GATKstd	intron_variant	MODIFIER	LOC102154536	102154536	transcript	XR_002630848.1	pseudogene	3	n.600+8359C>T
10	58852211	G	A	GATKstd	intron_variant	MODIFIER	LOC102154583	102154583	transcript	XR_002630845.1	pseudogene	1	n.91+6589G>A
10	58853938	C	T	GATKstd	intron_variant	MODIFIER	LOC102154536	102154536	transcript	XR_002630849.1	pseudogene	3	n.604+6632G>A
10	58853938	C	T	GATKstd	intron_variant	MODIFIER	LOC102154536	102154536	transcript	XR_002630848.1	pseudogene	3	n.600+6632G>A
10	58853938	C	T	GATKstd	intron_variant	MODIFIER	LOC102154583	102154583	transcript	XR_002630845.1	pseudogene	1	n.91+8316C>T
10	58857085	T	G	GATKstd	downstream_gene_variant	MODIFIER	LOC102154536	102154536	transcript	XR_002630847.1	pseudogene	-1	n.*2700A>C
10	58857085	T	G	GATKstd	intron_variant	MODIFIER	LOC102154536	102154536	transcript	XR_002630849.1	pseudogene	3	n.604+3485A>C
10	58857085	T	G	GATKstd	intron_variant	MODIFIER	LOC102154536	102154536	transcript	XR_002630848.1	pseudogene	3	n.600+3485A>C
10	58857085	T	G	GATKstd	intron_variant	MODIFIER	LOC102154583	102154583	transcript	XR_002630845.1	pseudogene	1	n.91+11463T>G
10	58858280	T	C	GATKstd	downstream_gene_variant	MODIFIER	LOC102154536	102154536	transcript	XR_002630847.1	pseudogene	-1	n.*1505A>G
10	58858280	T	C	GATKstd	intron_variant	MODIFIER	LOC102154536	102154536	transcript	XR_002630849.1	pseudogene	3	n.604+2290A>G
10	58858280	T	C	GATKstd	intron_variant	MODIFIER	LOC102154536	102154536	transcript	XR_002630848.1	pseudogene	3	n.600+2290A>G
10	58858280	T	C	GATKstd	intron_variant	MODIFIER	LOC102154583	102154583	transcript	XR_002630845.1	pseudogene	1	n.91+12658T>C
10	58861504	A	C	GATKstd	intron_variant	MODIFIER	LOC102154536	102154536	transcript	XR_002630849.1	pseudogene	2	n.476-806T>G
10	58861504	A	C	GATKstd	intron_variant	MODIFIER	LOC102154536	102154536	transcript	XR_002630848.1	pseudogene	2	n.472-806T>G
10	58861504	A	C	GATKstd	intron_variant	MODIFIER	LOC102154583	102154583	transcript	XR_002630845.1	pseudogene	1	n.91+15882A>C
10	58861504	A	C	GATKstd	intron_variant	MODIFIER	LOC102154536	102154536	transcript	XR_002630847.1	pseudogene	2	n.197-806T>G
10	58862132	A	C	GATKstd	intron_variant	MODIFIER	LOC102154536	102154536	transcript	XR_002630849.1	pseudogene	2	n.476-1434T>G
10	58862132	A	C	GATKstd	intron_variant	MODIFIER	LOC102154536	102154536	transcript	XR_002630848.1	pseudogene	2	n.472-1434T>G
10	58862132	A	C	GATKstd	intron_variant	MODIFIER	LOC102154583	102154583	transcript	XR_002630845.1	pseudogene	1	n.91+16510A>C
10	58862132	A	C	GATKstd	intron_variant	MODIFIER	LOC102154536	102154536	transcript	XR_002630847.1	pseudogene	2	n.197-1434T>G
10	58863947	C	A	GATKstd	intron_variant	MODIFIER	LOC102154536	102154536	transcript	XR_002630849.1	pseudogene	2	n.475+3176G>T
10	58863947	C	A	GATKstd	intron_variant	MODIFIER	LOC102154536	102154536	transcript	XR_002630848.1	pseudogene	2	n.471+3176G>T
10	58863947	C	A	GATKstd	intron_variant	MODIFIER	LOC102154583	102154583	transcript	XR_002630845.1	pseudogene	1	n.91+18325C>A
10	58863947	C	A	GATKstd	intron_variant	MODIFIER	LOC102154536	102154536	transcript	XR_002630847.1	pseudogene	2	n.196+3176G>T
10	58864079	GCGCA	G	PASS	intron_variant	MODIFIER	LOC102154536	102154536	transcript	XR_002630849.1	pseudogene	2	n.475+3040_475+3043delTGCG
10	58864079	GCGCA	G	PASS	intron_variant	MODIFIER	LOC102154536	102154536	transcript	XR_002630848.1	pseudogene	2	n.471+3040_471+3043delTGCG
10	58864079	GCGCA	G	PASS	intron_variant	MODIFIER	LOC102154583	102154583	transcript	XR_002630845.1	pseudogene	1	n.91+18458_91+18461delCGCA
10	58864079	GCGCA	G	PASS	intron_variant	MODIFIER	LOC102154536	102154536	transcript	XR_002630847.1	pseudogene	2	n.196+3040_196+3043delTGCG
10	58864351	GC	G	PASS	intron_variant	MODIFIER	LOC102154536	102154536	transcript	XR_002630849.1	pseudogene	2	n.475+2771delG
10	58864351	GC	G	PASS	intron_variant	MODIFIER	LOC102154536	102154536	transcript	XR_002630848.1	pseudogene	2	n.471+2771delG
10	58864351	GC	G	PASS	intron_variant	MODIFIER	LOC102154583	102154583	transcript	XR_002630845.1	pseudogene	1	n.91+18730delC
10	58864351	GC	G	PASS	intron_variant	MODIFIER	LOC102154536	102154536	transcript	XR_002630847.1	pseudogene	2	n.196+2771delG
10	58868045	C	T	GATKstd	intron_variant	MODIFIER	LOC102154536	102154536	transcript	XR_002630849.1	pseudogene	1	n.411-858G>A
10	58868045	C	T	GATKstd	intron_variant	MODIFIER	LOC102154536	102154536	transcript	XR_002630848.1	pseudogene	1	n.407-858G>A
10	58868045	C	T	GATKstd	intron_variant	MODIFIER	LOC102154583	102154583	transcript	XR_002630845.1	pseudogene	1	n.91+22423C>T
10	58868045	C	T	GATKstd	intron_variant	MODIFIER	LOC102154536	102154536	transcript	XR_002630847.1	pseudogene	1	n.132-858G>A
10	58872921	G	A	PASS	intron_variant	MODIFIER	LOC102154536	102154536	transcript	XR_002630849.1	pseudogene	1	n.411-5734C>T
10	58872921	G	A	PASS	intron_variant	MODIFIER	LOC102154536	102154536	transcript	XR_002630848.1	pseudogene	1	n.407-5734C>T
10	58872921	G	A	PASS	intron_variant	MODIFIER	LOC102154583	102154583	transcript	XR_002630845.1	pseudogene	1	n.91+27299G>A
10	58872921	G	A	PASS	intron_variant	MODIFIER	LOC102154536	102154536	transcript	XR_002630847.1	pseudogene	1	n.132-5734C>T
10	58873128	G	A	GATKstd	intron_variant	MODIFIER	LOC102154536	102154536	transcript	XR_002630849.1	pseudogene	1	n.411-5941C>T
10	58873128	G	A	GATKstd	intron_variant	MODIFIER	LOC102154536	102154536	transcript	XR_002630848.1	pseudogene	1	n.407-5941C>T
10	58873128	G	A	GATKstd	intron_variant	MODIFIER	LOC102154583	102154583	transcript	XR_002630845.1	pseudogene	1	n.91+27506G>A
10	58873128	G	A	GATKstd	intron_variant	MODIFIER	LOC102154536	102154536	transcript	XR_002630847.1	pseudogene	1	n.132-5941C>T
10	58874572	TTG	T	PASS	intron_variant	MODIFIER	LOC102154536	102154536	transcript	XR_002630849.1	pseudogene	1	n.411-7387_411-7386delCA
10	58874572	TTG	T	PASS	intron_variant	MODIFIER	LOC102154536	102154536	transcript	XR_002630848.1	pseudogene	1	n.407-7387_407-7386delCA
10	58874572	TTG	T	PASS	intron_variant	MODIFIER	LOC102154583	102154583	transcript	XR_002630845.1	pseudogene	1	n.91+28951_91+28952delTG
10	58874572	TTG	T	PASS	intron_variant	MODIFIER	LOC102154536	102154536	transcript	XR_002630847.1	pseudogene	1	n.132-7387_132-7386delCA
10	58874662	C	A	GATKstd	intron_variant	MODIFIER	LOC102154536	102154536	transcript	XR_002630849.1	pseudogene	1	n.411-7475G>T
10	58874662	C	A	GATKstd	intron_variant	MODIFIER	LOC102154536	102154536	transcript	XR_002630848.1	pseudogene	1	n.407-7475G>T
10	58874662	C	A	GATKstd	intron_variant	MODIFIER	LOC102154583	102154583	transcript	XR_002630845.1	pseudogene	1	n.91+29040C>A
10	58874662	C	A	GATKstd	intron_variant	MODIFIER	LOC102154536	102154536	transcript	XR_002630847.1	pseudogene	1	n.132-7475G>T
10	58875878	CA	C	PASS	intron_variant	MODIFIER	LOC102154536	102154536	transcript	XR_002630849.1	pseudogene	1	n.411-8692delT
10	58875878	CA	C	PASS	intron_variant	MODIFIER	LOC102154536	102154536	transcript	XR_002630848.1	pseudogene	1	n.407-8692delT
10	58875878	CA	C	PASS	intron_variant	MODIFIER	LOC102154583	102154583	transcript	XR_002630845.1	pseudogene	1	n.91+30257delA
10	58875878	CA	C	PASS	intron_variant	MODIFIER	LOC102154536	102154536	transcript	XR_002630847.1	pseudogene	1	n.132-8692delT
10	58875880	G	C	GATKstd	intron_variant	MODIFIER	LOC102154536	102154536	transcript	XR_002630849.1	pseudogene	1	n.411-8693C>G
10	58875880	G	C	GATKstd	intron_variant	MODIFIER	LOC102154536	102154536	transcript	XR_002630848.1	pseudogene	1	n.407-8693C>G
10	58875880	G	C	GATKstd	intron_variant	MODIFIER	LOC102154583	102154583	transcript	XR_002630845.1	pseudogene	1	n.91+30258G>C
10	58875880	G	C	GATKstd	intron_variant	MODIFIER	LOC102154536	102154536	transcript	XR_002630847.1	pseudogene	1	n.132-8693C>G
10	58875882	C	CTT	PASS	intron_variant	MODIFIER	LOC102154536	102154536	transcript	XR_002630849.1	pseudogene	1	n.411-8696_411-8695insAA
10	58875882	C	CTT	PASS	intron_variant	MODIFIER	LOC102154536	102154536	transcript	XR_002630848.1	pseudogene	1	n.407-8696_407-8695insAA
10	58875882	C	CTT	PASS	intron_variant	MODIFIER	LOC102154583	102154583	transcript	XR_002630845.1	pseudogene	1	n.91+30260_91+30261insTT
10	58875882	C	CTT	PASS	intron_variant	MODIFIER	LOC102154536	102154536	transcript	XR_002630847.1	pseudogene	1	n.132-8696_132-8695insAA
10	58877941	A	C	GATKstd	intron_variant	MODIFIER	LOC102154536	102154536	transcript	XR_002630849.1	pseudogene	1	n.411-10754T>G
10	58877941	A	C	GATKstd	intron_variant	MODIFIER	LOC102154536	102154536	transcript	XR_002630848.1	pseudogene	1	n.407-10754T>G
10	58877941	A	C	GATKstd	intron_variant	MODIFIER	LOC102154583	102154583	transcript	XR_002630845.1	pseudogene	1	n.91+32319A>C
10	58877941	A	C	GATKstd	intron_variant	MODIFIER	LOC102154536	102154536	transcript	XR_002630847.1	pseudogene	1	n.132-10754T>G
10	58877987	G	A	GATKstd	intron_variant	MODIFIER	LOC102154536	102154536	transcript	XR_002630849.1	pseudogene	1	n.411-10800C>T
10	58877987	G	A	GATKstd	intron_variant	MODIFIER	LOC102154536	102154536	transcript	XR_002630848.1	pseudogene	1	n.407-10800C>T
10	58877987	G	A	GATKstd	intron_variant	MODIFIER	LOC102154583	102154583	transcript	XR_002630845.1	pseudogene	1	n.91+32365G>A
10	58877987	G	A	GATKstd	intron_variant	MODIFIER	LOC102154536	102154536	transcript	XR_002630847.1	pseudogene	1	n.132-10800C>T
10	58880059	T	C	GATKstd	intron_variant	MODIFIER	LOC102154536	102154536	transcript	XR_002630849.1	pseudogene	1	n.410+11192A>G
10	58880059	T	C	GATKstd	intron_variant	MODIFIER	LOC102154536	102154536	transcript	XR_002630848.1	pseudogene	1	n.406+11192A>G
10	58880059	T	C	GATKstd	intron_variant	MODIFIER	LOC102154583	102154583	transcript	XR_002630845.1	pseudogene	1	n.91+34437T>C
10	58880059	T	C	GATKstd	intron_variant	MODIFIER	LOC102154536	102154536	transcript	XR_002630847.1	pseudogene	1	n.131+11192A>G
10	58881166	A	C	PASS	intron_variant	MODIFIER	LOC102154536	102154536	transcript	XR_002630849.1	pseudogene	1	n.410+10085T>G
10	58881166	A	C	PASS	intron_variant	MODIFIER	LOC102154536	102154536	transcript	XR_002630848.1	pseudogene	1	n.406+10085T>G
10	58881166	A	C	PASS	intron_variant	MODIFIER	LOC102154583	102154583	transcript	XR_002630845.1	pseudogene	1	n.91+35544A>C
10	58881166	A	C	PASS	intron_variant	MODIFIER	LOC102154536	102154536	transcript	XR_002630847.1	pseudogene	1	n.131+10085T>G
10	58881191	A	T	PASS	intron_variant	MODIFIER	LOC102154536	102154536	transcript	XR_002630849.1	pseudogene	1	n.410+10060T>A
10	58881191	A	T	PASS	intron_variant	MODIFIER	LOC102154536	102154536	transcript	XR_002630848.1	pseudogene	1	n.406+10060T>A
10	58881191	A	T	PASS	intron_variant	MODIFIER	LOC102154583	102154583	transcript	XR_002630845.1	pseudogene	1	n.91+35569A>T
10	58881191	A	T	PASS	intron_variant	MODIFIER	LOC102154536	102154536	transcript	XR_002630847.1	pseudogene	1	n.131+10060T>A
10	58882135	A	G	PASS	intron_variant	MODIFIER	LOC102154536	102154536	transcript	XR_002630849.1	pseudogene	1	n.410+9116T>C
10	58882135	A	G	PASS	intron_variant	MODIFIER	LOC102154536	102154536	transcript	XR_002630848.1	pseudogene	1	n.406+9116T>C
10	58882135	A	G	PASS	intron_variant	MODIFIER	LOC102154583	102154583	transcript	XR_002630845.1	pseudogene	1	n.91+36513A>G
10	58882135	A	G	PASS	intron_variant	MODIFIER	LOC102154536	102154536	transcript	XR_002630847.1	pseudogene	1	n.131+9116T>C
10	58882488	G	A	GATKstd	intron_variant	MODIFIER	LOC102154536	102154536	transcript	XR_002630849.1	pseudogene	1	n.410+8763C>T
10	58882488	G	A	GATKstd	intron_variant	MODIFIER	LOC102154536	102154536	transcript	XR_002630848.1	pseudogene	1	n.406+8763C>T
10	58882488	G	A	GATKstd	intron_variant	MODIFIER	LOC102154583	102154583	transcript	XR_002630845.1	pseudogene	1	n.91+36866G>A
10	58882488	G	A	GATKstd	intron_variant	MODIFIER	LOC102154536	102154536	transcript	XR_002630847.1	pseudogene	1	n.131+8763C>T
10	58891320	G	T	GATKstd	intron_variant	MODIFIER	LOC102154583	102154583	transcript	XR_002630845.1	pseudogene	1	n.91+45698G>T
10	58891320	G	T	GATKstd	non_coding_transcript_exon_variant	MODIFIER	LOC102154536	102154536	transcript	XR_002630849.1	pseudogene	1	n.341C>A
10	58891320	G	T	GATKstd	non_coding_transcript_exon_variant	MODIFIER	LOC102154536	102154536	transcript	XR_002630848.1	pseudogene	1	n.337C>A
10	58891320	G	T	GATKstd	non_coding_transcript_exon_variant	MODIFIER	LOC102154536	102154536	transcript	XR_002630847.1	pseudogene	1	n.62C>A
10	58891683	G	GGGGA	PASS	upstream_gene_variant	MODIFIER	LOC102154536	102154536	transcript	XR_002630849.1	pseudogene	-1	n.-24_-23insTCCC
10	58891683	G	GGGGA	PASS	upstream_gene_variant	MODIFIER	LOC102154536	102154536	transcript	XR_002630848.1	pseudogene	-1	n.-28_-27insTCCC
10	58891683	G	GGGGA	PASS	upstream_gene_variant	MODIFIER	LOC102154536	102154536	transcript	XR_002630847.1	pseudogene	-1	n.-303_-302insTCCC
10	58891683	G	GGGGA	PASS	intron_variant	MODIFIER	LOC102154583	102154583	transcript	XR_002630845.1	pseudogene	1	n.91+46061_91+46062insGGGA
10	58892358	A	G	PASS	upstream_gene_variant	MODIFIER	LOC102154536	102154536	transcript	XR_002630849.1	pseudogene	-1	n.-698T>C
10	58892358	A	G	PASS	upstream_gene_variant	MODIFIER	LOC102154536	102154536	transcript	XR_002630848.1	pseudogene	-1	n.-702T>C
10	58892358	A	G	PASS	upstream_gene_variant	MODIFIER	LOC102154536	102154536	transcript	XR_002630847.1	pseudogene	-1	n.-977T>C
10	58892358	A	G	PASS	intron_variant	MODIFIER	LOC102154583	102154583	transcript	XR_002630845.1	pseudogene	1	n.91+46736A>G
10	58892519	T	C	PASS	upstream_gene_variant	MODIFIER	LOC102154536	102154536	transcript	XR_002630849.1	pseudogene	-1	n.-859A>G
10	58892519	T	C	PASS	upstream_gene_variant	MODIFIER	LOC102154536	102154536	transcript	XR_002630848.1	pseudogene	-1	n.-863A>G
10	58892519	T	C	PASS	upstream_gene_variant	MODIFIER	LOC102154536	102154536	transcript	XR_002630847.1	pseudogene	-1	n.-1138A>G
10	58892519	T	C	PASS	intron_variant	MODIFIER	LOC102154583	102154583	transcript	XR_002630845.1	pseudogene	1	n.91+46897T>C
10	58892794	T	C	GATKstd	upstream_gene_variant	MODIFIER	LOC102154536	102154536	transcript	XR_002630849.1	pseudogene	-1	n.-1134A>G
10	58892794	T	C	GATKstd	upstream_gene_variant	MODIFIER	LOC102154536	102154536	transcript	XR_002630848.1	pseudogene	-1	n.-1138A>G
10	58892794	T	C	GATKstd	upstream_gene_variant	MODIFIER	LOC102154536	102154536	transcript	XR_002630847.1	pseudogene	-1	n.-1413A>G
10	58892794	T	C	GATKstd	intron_variant	MODIFIER	LOC102154583	102154583	transcript	XR_002630845.1	pseudogene	1	n.91+47172T>C
10	58893172	G	A	PASS	upstream_gene_variant	MODIFIER	LOC102154536	102154536	transcript	XR_002630849.1	pseudogene	-1	n.-1512C>T
10	58893172	G	A	PASS	upstream_gene_variant	MODIFIER	LOC102154536	102154536	transcript	XR_002630848.1	pseudogene	-1	n.-1516C>T
10	58893172	G	A	PASS	upstream_gene_variant	MODIFIER	LOC102154536	102154536	transcript	XR_002630847.1	pseudogene	-1	n.-1791C>T
10	58893172	G	A	PASS	intron_variant	MODIFIER	LOC102154583	102154583	transcript	XR_002630845.1	pseudogene	1	n.91+47550G>A
10	58893790	C	CAG	PASS	upstream_gene_variant	MODIFIER	LOC102154536	102154536	transcript	XR_002630849.1	pseudogene	-1	n.-2131_-2130insCT
10	58893790	C	CAG	PASS	upstream_gene_variant	MODIFIER	LOC102154536	102154536	transcript	XR_002630848.1	pseudogene	-1	n.-2135_-2134insCT
10	58893790	C	CAG	PASS	upstream_gene_variant	MODIFIER	LOC102154536	102154536	transcript	XR_002630847.1	pseudogene	-1	n.-2410_-2409insCT
10	58893790	C	CAG	PASS	intron_variant	MODIFIER	LOC102154583	102154583	transcript	XR_002630845.1	pseudogene	1	n.91+48168_91+48169insAG
10	58894470	C	T	PASS	upstream_gene_variant	MODIFIER	LOC102154536	102154536	transcript	XR_002630849.1	pseudogene	-1	n.-2810G>A
10	58894470	C	T	PASS	upstream_gene_variant	MODIFIER	LOC102154536	102154536	transcript	XR_002630848.1	pseudogene	-1	n.-2814G>A
10	58894470	C	T	PASS	upstream_gene_variant	MODIFIER	LOC102154536	102154536	transcript	XR_002630847.1	pseudogene	-1	n.-3089G>A
10	58894470	C	T	PASS	intron_variant	MODIFIER	LOC102154583	102154583	transcript	XR_002630845.1	pseudogene	1	n.92-47998C>T
10	58894493	G	A	PASS	upstream_gene_variant	MODIFIER	LOC102154536	102154536	transcript	XR_002630849.1	pseudogene	-1	n.-2833C>T
10	58894493	G	A	PASS	upstream_gene_variant	MODIFIER	LOC102154536	102154536	transcript	XR_002630848.1	pseudogene	-1	n.-2837C>T
10	58894493	G	A	PASS	upstream_gene_variant	MODIFIER	LOC102154536	102154536	transcript	XR_002630847.1	pseudogene	-1	n.-3112C>T
10	58894493	G	A	PASS	intron_variant	MODIFIER	LOC102154583	102154583	transcript	XR_002630845.1	pseudogene	1	n.92-47975G>A
10	58894620	G	C	GATKstd	upstream_gene_variant	MODIFIER	LOC102154536	102154536	transcript	XR_002630849.1	pseudogene	-1	n.-2960C>G
10	58894620	G	C	GATKstd	upstream_gene_variant	MODIFIER	LOC102154536	102154536	transcript	XR_002630848.1	pseudogene	-1	n.-2964C>G
10	58894620	G	C	GATKstd	upstream_gene_variant	MODIFIER	LOC102154536	102154536	transcript	XR_002630847.1	pseudogene	-1	n.-3239C>G
10	58894620	G	C	GATKstd	intron_variant	MODIFIER	LOC102154583	102154583	transcript	XR_002630845.1	pseudogene	1	n.92-47848G>C
10	58897903	G	A	PASS	intron_variant	MODIFIER	LOC102154583	102154583	transcript	XR_002630845.1	pseudogene	1	n.92-44565G>A
10	58898650	G	A	GATKstd	intron_variant	MODIFIER	LOC102154583	102154583	transcript	XR_002630845.1	pseudogene	1	n.92-43818G>A
10	58899271	TA	T	PASS	intron_variant	MODIFIER	LOC102154583	102154583	transcript	XR_002630845.1	pseudogene	1	n.92-43196delA
10	58901059	T	TC	PASS	intron_variant	MODIFIER	LOC102154583	102154583	transcript	XR_002630845.1	pseudogene	1	n.92-41409_92-41408insC
10	58905019	G	GACACACACAC	PASS	intron_variant	MODIFIER	LOC102154583	102154583	transcript	XR_002630845.1	pseudogene	1	n.92-37449_92-37448insACACACACAC
10	58905021	G	C	PASS	intron_variant	MODIFIER	LOC102154583	102154583	transcript	XR_002630845.1	pseudogene	1	n.92-37447G>C
10	58905405	C	T	GATKstd	intron_variant	MODIFIER	LOC102154583	102154583	transcript	XR_002630845.1	pseudogene	1	n.92-37063C>T
10	58906360	TC	T	PASS	downstream_gene_variant	MODIFIER	LOC111097765	111097765	transcript	XR_002630850.1	pseudogene	-1	n.*4502delG
10	58906360	TC	T	PASS	intron_variant	MODIFIER	LOC102154583	102154583	transcript	XR_002630845.1	pseudogene	1	n.92-36107delC
10	58909047	G	A	PASS	downstream_gene_variant	MODIFIER	LOC111097765	111097765	transcript	XR_002630850.1	pseudogene	-1	n.*1816C>T
10	58909047	G	A	PASS	intron_variant	MODIFIER	LOC102154583	102154583	transcript	XR_002630845.1	pseudogene	1	n.92-33421G>A
10	58910052	A	T	GATKstd	downstream_gene_variant	MODIFIER	LOC111097765	111097765	transcript	XR_002630850.1	pseudogene	-1	n.*811T>A
10	58910052	A	T	GATKstd	intron_variant	MODIFIER	LOC102154583	102154583	transcript	XR_002630845.1	pseudogene	1	n.92-32416A>T
10	58910236	C	T	GATKstd	downstream_gene_variant	MODIFIER	LOC111097765	111097765	transcript	XR_002630850.1	pseudogene	-1	n.*627G>A
10	58910236	C	T	GATKstd	intron_variant	MODIFIER	LOC102154583	102154583	transcript	XR_002630845.1	pseudogene	1	n.92-32232C>T
10	58914530	A	G	PASS	intron_variant	MODIFIER	LOC111097765	111097765	transcript	XR_002630850.1	pseudogene	2	n.2243-2119T>C
10	58914530	A	G	PASS	intron_variant	MODIFIER	LOC102154583	102154583	transcript	XR_002630845.1	pseudogene	1	n.92-27938A>G
10	58916212	G	A	GATKstd	intron_variant	MODIFIER	LOC111097765	111097765	transcript	XR_002630850.1	pseudogene	2	n.2242+897C>T
10	58916212	G	A	GATKstd	intron_variant	MODIFIER	LOC102154583	102154583	transcript	XR_002630845.1	pseudogene	1	n.92-26256G>A
10	58916661	G	A	PASS	intron_variant	MODIFIER	LOC111097765	111097765	transcript	XR_002630850.1	pseudogene	2	n.2242+448C>T
10	58916661	G	A	PASS	intron_variant	MODIFIER	LOC102154583	102154583	transcript	XR_002630845.1	pseudogene	1	n.92-25807G>A
10	58917720	A	C	GATKstd	intron_variant	MODIFIER	LOC102154583	102154583	transcript	XR_002630845.1	pseudogene	1	n.92-24748A>C
10	58917720	A	C	GATKstd	non_coding_transcript_exon_variant	MODIFIER	LOC111097765	111097765	transcript	XR_002630850.1	pseudogene	1	n.2099T>G
10	58927503	C	G	PASS	intron_variant	MODIFIER	LOC102154583	102154583	transcript	XR_002630845.1	pseudogene	1	n.92-14965C>G
10	58927503	C	G	PASS	non_coding_transcript_exon_variant	MODIFIER	LOC111097766	111097766	transcript	XR_002630852.1	pseudogene	3	n.2322G>C
10	58927758	A	C	GATKstd	intron_variant	MODIFIER	LOC102154583	102154583	transcript	XR_002630845.1	pseudogene	1	n.92-14710A>C
10	58927758	A	C	GATKstd	non_coding_transcript_exon_variant	MODIFIER	LOC111097766	111097766	transcript	XR_002630852.1	pseudogene	3	n.2067T>G
10	58928052	TG	T	PASS	intron_variant	MODIFIER	LOC102154583	102154583	transcript	XR_002630845.1	pseudogene	1	n.92-14415delG
10	58928052	TG	T	PASS	non_coding_transcript_exon_variant	MODIFIER	LOC111097766	111097766	transcript	XR_002630852.1	pseudogene	3	n.1772delC
10	58929821	G	A	GATKstd	intron_variant	MODIFIER	LOC111097766	111097766	transcript	XR_002630852.1	pseudogene	2	n.1387-1383C>T
10	58929821	G	A	GATKstd	intron_variant	MODIFIER	LOC102154583	102154583	transcript	XR_002630845.1	pseudogene	1	n.92-12647G>A
10	58930216	AAC	A	PASS	intron_variant	MODIFIER	LOC111097766	111097766	transcript	XR_002630852.1	pseudogene	2	n.1387-1780_1387-1779delGT
10	58930216	AAC	A	PASS	intron_variant	MODIFIER	LOC102154583	102154583	transcript	XR_002630845.1	pseudogene	1	n.92-12251_92-12250delAC
10	58930416	C	T	GATKstd	intron_variant	MODIFIER	LOC111097766	111097766	transcript	XR_002630852.1	pseudogene	2	n.1387-1978G>A
10	58930416	C	T	GATKstd	intron_variant	MODIFIER	LOC102154583	102154583	transcript	XR_002630845.1	pseudogene	1	n.92-12052C>T
10	58930715	G	A	GATKstd	intron_variant	MODIFIER	LOC111097766	111097766	transcript	XR_002630852.1	pseudogene	2	n.1387-2277C>T
10	58930715	G	A	GATKstd	intron_variant	MODIFIER	LOC102154583	102154583	transcript	XR_002630845.1	pseudogene	1	n.92-11753G>A
10	58931307	T	A	GATKstd	intron_variant	MODIFIER	LOC111097766	111097766	transcript	XR_002630852.1	pseudogene	2	n.1387-2869A>T
10	58931307	T	A	GATKstd	intron_variant	MODIFIER	LOC102154583	102154583	transcript	XR_002630845.1	pseudogene	1	n.92-11161T>A
10	58933530	A	G	GATKstd	intron_variant	MODIFIER	LOC111097766	111097766	transcript	XR_002630852.1	pseudogene	2	n.1387-5092T>C
10	58933530	A	G	GATKstd	intron_variant	MODIFIER	LOC102154583	102154583	transcript	XR_002630845.1	pseudogene	1	n.92-8938A>G
10	58933793	C	A	GATKstd	intron_variant	MODIFIER	LOC111097766	111097766	transcript	XR_002630852.1	pseudogene	2	n.1387-5355G>T
10	58933793	C	A	GATKstd	intron_variant	MODIFIER	LOC102154583	102154583	transcript	XR_002630845.1	pseudogene	1	n.92-8675C>A
10	58934392	G	A	PASS	intron_variant	MODIFIER	LOC111097766	111097766	transcript	XR_002630852.1	pseudogene	2	n.1387-5954C>T
10	58934392	G	A	PASS	intron_variant	MODIFIER	LOC102154583	102154583	transcript	XR_002630845.1	pseudogene	1	n.92-8076G>A
10	58934659	T	C	GATKstd	intron_variant	MODIFIER	LOC111097766	111097766	transcript	XR_002630852.1	pseudogene	2	n.1387-6221A>G
10	58934659	T	C	GATKstd	intron_variant	MODIFIER	LOC102154583	102154583	transcript	XR_002630845.1	pseudogene	1	n.92-7809T>C
10	58934779	G	A	GATKstd	intron_variant	MODIFIER	LOC111097766	111097766	transcript	XR_002630852.1	pseudogene	2	n.1387-6341C>T
10	58934779	G	A	GATKstd	intron_variant	MODIFIER	LOC102154583	102154583	transcript	XR_002630845.1	pseudogene	1	n.92-7689G>A
10	58934984	T	C	PASS	intron_variant	MODIFIER	LOC111097766	111097766	transcript	XR_002630852.1	pseudogene	2	n.1387-6546A>G
10	58934984	T	C	PASS	intron_variant	MODIFIER	LOC102154583	102154583	transcript	XR_002630845.1	pseudogene	1	n.92-7484T>C
10	58937444	A	G	GATKstd	intron_variant	MODIFIER	LOC111097766	111097766	transcript	XR_002630852.1	pseudogene	2	n.1387-9006T>C
10	58937444	A	G	GATKstd	intron_variant	MODIFIER	LOC102154583	102154583	transcript	XR_002630845.1	pseudogene	1	n.92-5024A>G
10	58939319	A	G	PASS	intron_variant	MODIFIER	LOC111097766	111097766	transcript	XR_002630852.1	pseudogene	2	n.1387-10881T>C
10	58939319	A	G	PASS	intron_variant	MODIFIER	LOC102154583	102154583	transcript	XR_002630845.1	pseudogene	1	n.92-3149A>G
10	58940371	C	CTT	PASS	intron_variant	MODIFIER	LOC111097766	111097766	transcript	XR_002630852.1	pseudogene	2	n.1387-11934_1387-11933insAA
10	58940371	C	CTT	PASS	intron_variant	MODIFIER	LOC102154583	102154583	transcript	XR_002630845.1	pseudogene	1	n.92-2097_92-2096insTT
10	58941202	G	T	GATKstd	intron_variant	MODIFIER	LOC111097766	111097766	transcript	XR_002630852.1	pseudogene	2	n.1387-12764C>A
10	58941202	G	T	GATKstd	intron_variant	MODIFIER	LOC102154583	102154583	transcript	XR_002630845.1	pseudogene	1	n.92-1266G>T
10	58941858	A	AC	PASS	intron_variant	MODIFIER	LOC111097766	111097766	transcript	XR_002630852.1	pseudogene	2	n.1387-13421_1387-13420insG
10	58941858	A	AC	PASS	intron_variant	MODIFIER	LOC102154583	102154583	transcript	XR_002630845.1	pseudogene	1	n.92-610_92-609insC
10	58942075	A	G	GATKstd	intron_variant	MODIFIER	LOC111097766	111097766	transcript	XR_002630852.1	pseudogene	2	n.1386+13565T>C
10	58942075	A	G	GATKstd	intron_variant	MODIFIER	LOC102154583	102154583	transcript	XR_002630845.1	pseudogene	1	n.92-393A>G
10	58942738	A	T	GATKstd	intron_variant	MODIFIER	LOC111097766	111097766	transcript	XR_002630852.1	pseudogene	2	n.1386+12902T>A
10	58942738	A	T	GATKstd	intron_variant	MODIFIER	LOC102154583	102154583	transcript	XR_002630845.1	pseudogene	2	n.145+217A>T
10	58944442	G	A	GATKstd	downstream_gene_variant	MODIFIER	LOC111097766	111097766	transcript	XR_002630851.1	pseudogene	-1	n.*4911C>T
10	58944442	G	A	GATKstd	intron_variant	MODIFIER	LOC111097766	111097766	transcript	XR_002630852.1	pseudogene	2	n.1386+11198C>T
10	58944442	G	A	GATKstd	intron_variant	MODIFIER	LOC102154583	102154583	transcript	XR_002630845.1	pseudogene	3	n.208+337G>A
10	58946263	C	T	GATKstd	downstream_gene_variant	MODIFIER	LOC111097766	111097766	transcript	XR_002630851.1	pseudogene	-1	n.*3090G>A
10	58946263	C	T	GATKstd	intron_variant	MODIFIER	LOC111097766	111097766	transcript	XR_002630852.1	pseudogene	2	n.1386+9377G>A
10	58946263	C	T	GATKstd	intron_variant	MODIFIER	LOC102154583	102154583	transcript	XR_002630845.1	pseudogene	3	n.208+2158C>T
10	58947377	T	C	GATKstd	downstream_gene_variant	MODIFIER	LOC111097766	111097766	transcript	XR_002630851.1	pseudogene	-1	n.*1976A>G
10	58947377	T	C	GATKstd	intron_variant	MODIFIER	LOC111097766	111097766	transcript	XR_002630852.1	pseudogene	2	n.1386+8263A>G
10	58947377	T	C	GATKstd	intron_variant	MODIFIER	LOC102154583	102154583	transcript	XR_002630845.1	pseudogene	3	n.208+3272T>C
10	58949408	G	A	PASS	intron_variant	MODIFIER	LOC111097766	111097766	transcript	XR_002630852.1	pseudogene	2	n.1386+6232C>T
10	58949408	G	A	PASS	intron_variant	MODIFIER	LOC102154583	102154583	transcript	XR_002630845.1	pseudogene	3	n.208+5303G>A
10	58949408	G	A	PASS	non_coding_transcript_exon_variant	MODIFIER	LOC111097766	111097766	transcript	XR_002630851.1	pseudogene	3	n.1930C>T
10	58951495	C	T	GATKstd	intron_variant	MODIFIER	LOC111097766	111097766	transcript	XR_002630852.1	pseudogene	2	n.1386+4145G>A
10	58951495	C	T	GATKstd	intron_variant	MODIFIER	LOC102154583	102154583	transcript	XR_002630845.1	pseudogene	3	n.208+7390C>T
10	58951495	C	T	GATKstd	intron_variant	MODIFIER	LOC111097766	111097766	transcript	XR_002630851.1	pseudogene	2	n.1387-1544G>A
10	58951593	T	C	GATKstd	intron_variant	MODIFIER	LOC111097766	111097766	transcript	XR_002630852.1	pseudogene	2	n.1386+4047A>G
10	58951593	T	C	GATKstd	intron_variant	MODIFIER	LOC102154583	102154583	transcript	XR_002630845.1	pseudogene	3	n.208+7488T>C
10	58951593	T	C	GATKstd	intron_variant	MODIFIER	LOC111097766	111097766	transcript	XR_002630851.1	pseudogene	2	n.1387-1642A>G
10	58951749	C	T	GATKstd	intron_variant	MODIFIER	LOC111097766	111097766	transcript	XR_002630852.1	pseudogene	2	n.1386+3891G>A
10	58951749	C	T	GATKstd	intron_variant	MODIFIER	LOC102154583	102154583	transcript	XR_002630845.1	pseudogene	3	n.208+7644C>T
10	58951749	C	T	GATKstd	intron_variant	MODIFIER	LOC111097766	111097766	transcript	XR_002630851.1	pseudogene	2	n.1387-1798G>A
10	58952312	A	AT	PASS	intron_variant	MODIFIER	LOC111097766	111097766	transcript	XR_002630852.1	pseudogene	2	n.1386+3327_1386+3328insA
10	58952312	A	AT	PASS	intron_variant	MODIFIER	LOC102154583	102154583	transcript	XR_002630845.1	pseudogene	3	n.208+8207_208+8208insT
10	58952312	A	AT	PASS	intron_variant	MODIFIER	LOC111097766	111097766	transcript	XR_002630851.1	pseudogene	2	n.1387-2362_1387-2361insA
10	58952400	T	C	PASS	intron_variant	MODIFIER	LOC111097766	111097766	transcript	XR_002630852.1	pseudogene	2	n.1386+3240A>G
10	58952400	T	C	PASS	intron_variant	MODIFIER	LOC102154583	102154583	transcript	XR_002630845.1	pseudogene	3	n.208+8295T>C
10	58952400	T	C	PASS	intron_variant	MODIFIER	LOC111097766	111097766	transcript	XR_002630851.1	pseudogene	2	n.1387-2449A>G
10	58952735	C	G	PASS	intron_variant	MODIFIER	LOC111097766	111097766	transcript	XR_002630852.1	pseudogene	2	n.1386+2905G>C
10	58952735	C	G	PASS	intron_variant	MODIFIER	LOC102154583	102154583	transcript	XR_002630845.1	pseudogene	3	n.208+8630C>G
10	58952735	C	G	PASS	intron_variant	MODIFIER	LOC111097766	111097766	transcript	XR_002630851.1	pseudogene	2	n.1387-2784G>C
10	58953389	C	T	PASS	intron_variant	MODIFIER	LOC111097766	111097766	transcript	XR_002630852.1	pseudogene	2	n.1386+2251G>A
10	58953389	C	T	PASS	intron_variant	MODIFIER	LOC102154583	102154583	transcript	XR_002630845.1	pseudogene	3	n.208+9284C>T
10	58953389	C	T	PASS	intron_variant	MODIFIER	LOC111097766	111097766	transcript	XR_002630851.1	pseudogene	2	n.1386+2251G>A
10	58953430	A	G	PASS	intron_variant	MODIFIER	LOC111097766	111097766	transcript	XR_002630852.1	pseudogene	2	n.1386+2210T>C
10	58953430	A	G	PASS	intron_variant	MODIFIER	LOC102154583	102154583	transcript	XR_002630845.1	pseudogene	3	n.208+9325A>G
10	58953430	A	G	PASS	intron_variant	MODIFIER	LOC111097766	111097766	transcript	XR_002630851.1	pseudogene	2	n.1386+2210T>C
10	58955736	G	A	GATKstd	intron_variant	MODIFIER	LOC102154583	102154583	transcript	XR_002630845.1	pseudogene	3	n.208+11631G>A
10	58955736	G	A	GATKstd	non_coding_transcript_exon_variant	MODIFIER	LOC111097766	111097766	transcript	XR_002630852.1	pseudogene	2	n.1290C>T
10	58955736	G	A	GATKstd	non_coding_transcript_exon_variant	MODIFIER	LOC111097766	111097766	transcript	XR_002630851.1	pseudogene	2	n.1290C>T
10	58955781	CA	C	PASS	intron_variant	MODIFIER	LOC102154583	102154583	transcript	XR_002630845.1	pseudogene	3	n.208+11678delA
10	58955781	CA	C	PASS	non_coding_transcript_exon_variant	MODIFIER	LOC111097766	111097766	transcript	XR_002630852.1	pseudogene	2	n.1244delT
10	58955781	CA	C	PASS	non_coding_transcript_exon_variant	MODIFIER	LOC111097766	111097766	transcript	XR_002630851.1	pseudogene	2	n.1244delT
10	58955838	G	A	GATKstd	intron_variant	MODIFIER	LOC111097766	111097766	transcript	XR_002630852.1	pseudogene	1	n.1229-41C>T
10	58955838	G	A	GATKstd	intron_variant	MODIFIER	LOC102154583	102154583	transcript	XR_002630845.1	pseudogene	3	n.208+11733G>A
10	58955838	G	A	GATKstd	intron_variant	MODIFIER	LOC111097766	111097766	transcript	XR_002630851.1	pseudogene	1	n.1229-41C>T
10	58955846	T	G	GATKstd	intron_variant	MODIFIER	LOC111097766	111097766	transcript	XR_002630852.1	pseudogene	1	n.1229-49A>C
10	58955846	T	G	GATKstd	intron_variant	MODIFIER	LOC102154583	102154583	transcript	XR_002630845.1	pseudogene	3	n.208+11741T>G
10	58955846	T	G	GATKstd	intron_variant	MODIFIER	LOC111097766	111097766	transcript	XR_002630851.1	pseudogene	1	n.1229-49A>C
10	58956424	T	A	PASS	intron_variant	MODIFIER	LOC111097766	111097766	transcript	XR_002630852.1	pseudogene	1	n.1229-627A>T
10	58956424	T	A	PASS	intron_variant	MODIFIER	LOC102154583	102154583	transcript	XR_002630845.1	pseudogene	3	n.208+12319T>A
10	58956424	T	A	PASS	intron_variant	MODIFIER	LOC111097766	111097766	transcript	XR_002630851.1	pseudogene	1	n.1229-627A>T
10	58956880	T	C	GATKstd	intron_variant	MODIFIER	LOC111097766	111097766	transcript	XR_002630852.1	pseudogene	1	n.1229-1083A>G
10	58956880	T	C	GATKstd	intron_variant	MODIFIER	LOC102154583	102154583	transcript	XR_002630845.1	pseudogene	3	n.208+12775T>C
10	58956880	T	C	GATKstd	intron_variant	MODIFIER	LOC111097766	111097766	transcript	XR_002630851.1	pseudogene	1	n.1229-1083A>G
10	58957147	G	GT	PASS	intron_variant	MODIFIER	LOC111097766	111097766	transcript	XR_002630852.1	pseudogene	1	n.1229-1351_1229-1350insA
10	58957147	G	GT	PASS	intron_variant	MODIFIER	LOC102154583	102154583	transcript	XR_002630845.1	pseudogene	3	n.208+13042_208+13043insT
10	58957147	G	GT	PASS	intron_variant	MODIFIER	LOC111097766	111097766	transcript	XR_002630851.1	pseudogene	1	n.1229-1351_1229-1350insA
10	58957487	A	G	GATKstd	intron_variant	MODIFIER	LOC111097766	111097766	transcript	XR_002630852.1	pseudogene	1	n.1229-1690T>C
10	58957487	A	G	GATKstd	intron_variant	MODIFIER	LOC102154583	102154583	transcript	XR_002630845.1	pseudogene	3	n.208+13382A>G
10	58957487	A	G	GATKstd	intron_variant	MODIFIER	LOC111097766	111097766	transcript	XR_002630851.1	pseudogene	1	n.1229-1690T>C
10	58957832	T	G	GATKstd	intron_variant	MODIFIER	LOC111097766	111097766	transcript	XR_002630852.1	pseudogene	1	n.1229-2035A>C
10	58957832	T	G	GATKstd	intron_variant	MODIFIER	LOC102154583	102154583	transcript	XR_002630845.1	pseudogene	3	n.208+13727T>G
10	58957832	T	G	GATKstd	intron_variant	MODIFIER	LOC111097766	111097766	transcript	XR_002630851.1	pseudogene	1	n.1229-2035A>C
10	58958416	A	AGGGG	PASS	intron_variant	MODIFIER	LOC111097766	111097766	transcript	XR_002630852.1	pseudogene	1	n.1229-2620_1229-2619insCCCC
10	58958416	A	AGGGG	PASS	intron_variant	MODIFIER	LOC102154583	102154583	transcript	XR_002630845.1	pseudogene	3	n.208+14311_208+14312insGGGG
10	58958416	A	AGGGG	PASS	intron_variant	MODIFIER	LOC111097766	111097766	transcript	XR_002630851.1	pseudogene	1	n.1229-2620_1229-2619insCCCC
10	58960443	G	A	GATKstd	intron_variant	MODIFIER	LOC111097766	111097766	transcript	XR_002630852.1	pseudogene	1	n.1229-4646C>T
10	58960443	G	A	GATKstd	intron_variant	MODIFIER	LOC102154583	102154583	transcript	XR_002630845.1	pseudogene	3	n.208+16338G>A
10	58960443	G	A	GATKstd	intron_variant	MODIFIER	LOC111097766	111097766	transcript	XR_002630851.1	pseudogene	1	n.1229-4646C>T
10	58960898	T	A	GATKstd	intron_variant	MODIFIER	LOC111097766	111097766	transcript	XR_002630852.1	pseudogene	1	n.1229-5101A>T
10	58960898	T	A	GATKstd	intron_variant	MODIFIER	LOC102154583	102154583	transcript	XR_002630845.1	pseudogene	3	n.208+16793T>A
10	58960898	T	A	GATKstd	intron_variant	MODIFIER	LOC111097766	111097766	transcript	XR_002630851.1	pseudogene	1	n.1229-5101A>T
10	58961182	T	TAA	PASS	intron_variant	MODIFIER	LOC111097766	111097766	transcript	XR_002630852.1	pseudogene	1	n.1229-5386_1229-5385insTT
10	58961182	T	TAA	PASS	intron_variant	MODIFIER	LOC102154583	102154583	transcript	XR_002630845.1	pseudogene	3	n.208+17077_208+17078insAA
10	58961182	T	TAA	PASS	intron_variant	MODIFIER	LOC111097766	111097766	transcript	XR_002630851.1	pseudogene	1	n.1229-5386_1229-5385insTT
10	58962783	A	AAAAC	PASS	intron_variant	MODIFIER	LOC111097766	111097766	transcript	XR_002630852.1	pseudogene	1	n.1229-6987_1229-6986insGTTT
10	58962783	A	AAAAC	PASS	intron_variant	MODIFIER	LOC102154583	102154583	transcript	XR_002630845.1	pseudogene	3	n.208+18678_208+18679insAAAC
10	58962783	A	AAAAC	PASS	intron_variant	MODIFIER	LOC111097766	111097766	transcript	XR_002630851.1	pseudogene	1	n.1229-6987_1229-6986insGTTT
10	58963213	G	A	GATKstd	intron_variant	MODIFIER	LOC111097766	111097766	transcript	XR_002630852.1	pseudogene	1	n.1229-7416C>T
10	58963213	G	A	GATKstd	intron_variant	MODIFIER	LOC102154583	102154583	transcript	XR_002630845.1	pseudogene	3	n.208+19108G>A
10	58963213	G	A	GATKstd	intron_variant	MODIFIER	LOC111097766	111097766	transcript	XR_002630851.1	pseudogene	1	n.1229-7416C>T
10	58963465	C	A	GATKstd	intron_variant	MODIFIER	LOC111097766	111097766	transcript	XR_002630852.1	pseudogene	1	n.1229-7668G>T
10	58963465	C	A	GATKstd	intron_variant	MODIFIER	LOC102154583	102154583	transcript	XR_002630845.1	pseudogene	3	n.208+19360C>A
10	58963465	C	A	GATKstd	intron_variant	MODIFIER	LOC111097766	111097766	transcript	XR_002630851.1	pseudogene	1	n.1229-7668G>T
10	58964250	C	T	GATKstd	intron_variant	MODIFIER	LOC111097766	111097766	transcript	XR_002630852.1	pseudogene	1	n.1229-8453G>A
10	58964250	C	T	GATKstd	intron_variant	MODIFIER	LOC102154583	102154583	transcript	XR_002630845.1	pseudogene	3	n.208+20145C>T
10	58964250	C	T	GATKstd	intron_variant	MODIFIER	LOC111097766	111097766	transcript	XR_002630851.1	pseudogene	1	n.1229-8453G>A
10	58964492	C	T	GATKstd	intron_variant	MODIFIER	LOC111097766	111097766	transcript	XR_002630852.1	pseudogene	1	n.1229-8695G>A
10	58964492	C	T	GATKstd	intron_variant	MODIFIER	LOC102154583	102154583	transcript	XR_002630845.1	pseudogene	3	n.208+20387C>T
10	58964492	C	T	GATKstd	intron_variant	MODIFIER	LOC111097766	111097766	transcript	XR_002630851.1	pseudogene	1	n.1229-8695G>A
10	58964657	A	G	GATKstd	intron_variant	MODIFIER	LOC111097766	111097766	transcript	XR_002630852.1	pseudogene	1	n.1229-8860T>C
10	58964657	A	G	GATKstd	intron_variant	MODIFIER	LOC102154583	102154583	transcript	XR_002630845.1	pseudogene	3	n.208+20552A>G
10	58964657	A	G	GATKstd	intron_variant	MODIFIER	LOC111097766	111097766	transcript	XR_002630851.1	pseudogene	1	n.1229-8860T>C
10	58964838	A	G	GATKstd	intron_variant	MODIFIER	LOC111097766	111097766	transcript	XR_002630852.1	pseudogene	1	n.1229-9041T>C
10	58964838	A	G	GATKstd	intron_variant	MODIFIER	LOC102154583	102154583	transcript	XR_002630845.1	pseudogene	3	n.208+20733A>G
10	58964838	A	G	GATKstd	intron_variant	MODIFIER	LOC111097766	111097766	transcript	XR_002630851.1	pseudogene	1	n.1229-9041T>C
10	58965256	G	GA	PASS	intron_variant	MODIFIER	LOC111097766	111097766	transcript	XR_002630852.1	pseudogene	1	n.1229-9460_1229-9459insT
10	58965256	G	GA	PASS	intron_variant	MODIFIER	LOC102154583	102154583	transcript	XR_002630845.1	pseudogene	3	n.208+21151_208+21152insA
10	58965256	G	GA	PASS	intron_variant	MODIFIER	LOC111097766	111097766	transcript	XR_002630851.1	pseudogene	1	n.1229-9460_1229-9459insT
10	58965462	A	C	GATKstd	intron_variant	MODIFIER	LOC111097766	111097766	transcript	XR_002630852.1	pseudogene	1	n.1229-9665T>G
10	58965462	A	C	GATKstd	intron_variant	MODIFIER	LOC102154583	102154583	transcript	XR_002630845.1	pseudogene	3	n.208+21357A>C
10	58965462	A	C	GATKstd	intron_variant	MODIFIER	LOC111097766	111097766	transcript	XR_002630851.1	pseudogene	1	n.1229-9665T>G
10	58965527	T	C	GATKstd	intron_variant	MODIFIER	LOC111097766	111097766	transcript	XR_002630852.1	pseudogene	1	n.1229-9730A>G
10	58965527	T	C	GATKstd	intron_variant	MODIFIER	LOC102154583	102154583	transcript	XR_002630845.1	pseudogene	3	n.208+21422T>C
10	58965527	T	C	GATKstd	intron_variant	MODIFIER	LOC111097766	111097766	transcript	XR_002630851.1	pseudogene	1	n.1229-9730A>G
10	58965598	A	C	GATKstd	intron_variant	MODIFIER	LOC111097766	111097766	transcript	XR_002630852.1	pseudogene	1	n.1229-9801T>G
10	58965598	A	C	GATKstd	intron_variant	MODIFIER	LOC102154583	102154583	transcript	XR_002630845.1	pseudogene	3	n.208+21493A>C
10	58965598	A	C	GATKstd	intron_variant	MODIFIER	LOC111097766	111097766	transcript	XR_002630851.1	pseudogene	1	n.1229-9801T>G
10	58965945	T	G	PASS	intron_variant	MODIFIER	LOC111097766	111097766	transcript	XR_002630852.1	pseudogene	1	n.1229-10148A>C
10	58965945	T	G	PASS	intron_variant	MODIFIER	LOC102154583	102154583	transcript	XR_002630845.1	pseudogene	3	n.208+21840T>G
10	58965945	T	G	PASS	intron_variant	MODIFIER	LOC111097766	111097766	transcript	XR_002630851.1	pseudogene	1	n.1229-10148A>C
10	58967367	T	TTTTTTC	PASS	intron_variant	MODIFIER	LOC111097766	111097766	transcript	XR_002630852.1	pseudogene	1	n.1229-11571_1229-11570insGAAAAA
10	58967367	T	TTTTTTC	PASS	intron_variant	MODIFIER	LOC102154583	102154583	transcript	XR_002630845.1	pseudogene	3	n.208+23262_208+23263insTTTTTC
10	58967367	T	TTTTTTC	PASS	intron_variant	MODIFIER	LOC111097766	111097766	transcript	XR_002630851.1	pseudogene	1	n.1229-11571_1229-11570insGAAAAA
10	58968139	T	C	PASS	intron_variant	MODIFIER	LOC111097766	111097766	transcript	XR_002630852.1	pseudogene	1	n.1229-12342A>G
10	58968139	T	C	PASS	intron_variant	MODIFIER	LOC102154583	102154583	transcript	XR_002630845.1	pseudogene	3	n.208+24034T>C
10	58968139	T	C	PASS	intron_variant	MODIFIER	LOC111097766	111097766	transcript	XR_002630851.1	pseudogene	1	n.1229-12342A>G
10	58968481	A	G	PASS	intron_variant	MODIFIER	LOC111097766	111097766	transcript	XR_002630852.1	pseudogene	1	n.1229-12684T>C
10	58968481	A	G	PASS	intron_variant	MODIFIER	LOC102154583	102154583	transcript	XR_002630845.1	pseudogene	3	n.208+24376A>G
10	58968481	A	G	PASS	intron_variant	MODIFIER	LOC111097766	111097766	transcript	XR_002630851.1	pseudogene	1	n.1229-12684T>C
10	58969112	T	C	GATKstd	intron_variant	MODIFIER	LOC111097766	111097766	transcript	XR_002630852.1	pseudogene	1	n.1229-13315A>G
10	58969112	T	C	GATKstd	intron_variant	MODIFIER	LOC102154583	102154583	transcript	XR_002630845.1	pseudogene	3	n.208+25007T>C
10	58969112	T	C	GATKstd	intron_variant	MODIFIER	LOC111097766	111097766	transcript	XR_002630851.1	pseudogene	1	n.1229-13315A>G
10	58971350	C	A	GATKstd	intron_variant	MODIFIER	LOC111097766	111097766	transcript	XR_002630852.1	pseudogene	1	n.1229-15553G>T
10	58971350	C	A	GATKstd	intron_variant	MODIFIER	LOC102154583	102154583	transcript	XR_002630845.1	pseudogene	3	n.208+27245C>A
10	58971350	C	A	GATKstd	intron_variant	MODIFIER	LOC111097766	111097766	transcript	XR_002630851.1	pseudogene	1	n.1229-15553G>T
10	58971856	A	G	GATKstd	intron_variant	MODIFIER	LOC111097766	111097766	transcript	XR_002630852.1	pseudogene	1	n.1229-16059T>C
10	58971856	A	G	GATKstd	intron_variant	MODIFIER	LOC102154583	102154583	transcript	XR_002630845.1	pseudogene	3	n.208+27751A>G
10	58971856	A	G	GATKstd	intron_variant	MODIFIER	LOC111097766	111097766	transcript	XR_002630851.1	pseudogene	1	n.1229-16059T>C
10	58972090	T	C	GATKstd	intron_variant	MODIFIER	LOC111097766	111097766	transcript	XR_002630852.1	pseudogene	1	n.1229-16293A>G
10	58972090	T	C	GATKstd	intron_variant	MODIFIER	LOC102154583	102154583	transcript	XR_002630845.1	pseudogene	3	n.208+27985T>C
10	58972090	T	C	GATKstd	intron_variant	MODIFIER	LOC111097766	111097766	transcript	XR_002630851.1	pseudogene	1	n.1229-16293A>G
10	58972514	A	T	GATKstd	intron_variant	MODIFIER	LOC111097766	111097766	transcript	XR_002630852.1	pseudogene	1	n.1228+16219T>A
10	58972514	A	T	GATKstd	intron_variant	MODIFIER	LOC102154583	102154583	transcript	XR_002630845.1	pseudogene	3	n.208+28409A>T
10	58972514	A	T	GATKstd	intron_variant	MODIFIER	LOC111097766	111097766	transcript	XR_002630851.1	pseudogene	1	n.1228+16219T>A
10	58973124	G	A	GATKstd	intron_variant	MODIFIER	LOC111097766	111097766	transcript	XR_002630852.1	pseudogene	1	n.1228+15609C>T
10	58973124	G	A	GATKstd	intron_variant	MODIFIER	LOC102154583	102154583	transcript	XR_002630845.1	pseudogene	3	n.208+29019G>A
10	58973124	G	A	GATKstd	intron_variant	MODIFIER	LOC111097766	111097766	transcript	XR_002630851.1	pseudogene	1	n.1228+15609C>T
10	58973268	A	G	GATKstd	intron_variant	MODIFIER	LOC111097766	111097766	transcript	XR_002630852.1	pseudogene	1	n.1228+15465T>C
10	58973268	A	G	GATKstd	intron_variant	MODIFIER	LOC102154583	102154583	transcript	XR_002630845.1	pseudogene	3	n.208+29163A>G
10	58973268	A	G	GATKstd	intron_variant	MODIFIER	LOC111097766	111097766	transcript	XR_002630851.1	pseudogene	1	n.1228+15465T>C
10	58973407	C	T	GATKstd	intron_variant	MODIFIER	LOC111097766	111097766	transcript	XR_002630852.1	pseudogene	1	n.1228+15326G>A
10	58973407	C	T	GATKstd	intron_variant	MODIFIER	LOC102154583	102154583	transcript	XR_002630845.1	pseudogene	3	n.208+29302C>T
10	58973407	C	T	GATKstd	intron_variant	MODIFIER	LOC111097766	111097766	transcript	XR_002630851.1	pseudogene	1	n.1228+15326G>A
10	58973871	A	G	GATKstd	intron_variant	MODIFIER	LOC111097766	111097766	transcript	XR_002630852.1	pseudogene	1	n.1228+14862T>C
10	58973871	A	G	GATKstd	intron_variant	MODIFIER	LOC102154583	102154583	transcript	XR_002630845.1	pseudogene	3	n.208+29766A>G
10	58973871	A	G	GATKstd	intron_variant	MODIFIER	LOC111097766	111097766	transcript	XR_002630851.1	pseudogene	1	n.1228+14862T>C
10	58974227	T	C	GATKstd	intron_variant	MODIFIER	LOC111097766	111097766	transcript	XR_002630852.1	pseudogene	1	n.1228+14506A>G
10	58974227	T	C	GATKstd	intron_variant	MODIFIER	LOC102154583	102154583	transcript	XR_002630845.1	pseudogene	3	n.208+30122T>C
10	58974227	T	C	GATKstd	intron_variant	MODIFIER	LOC111097766	111097766	transcript	XR_002630851.1	pseudogene	1	n.1228+14506A>G
10	58974570	TA	T	PASS	intron_variant	MODIFIER	LOC111097766	111097766	transcript	XR_002630852.1	pseudogene	1	n.1228+14162delT
10	58974570	TA	T	PASS	intron_variant	MODIFIER	LOC102154583	102154583	transcript	XR_002630845.1	pseudogene	3	n.208+30466delA
10	58974570	TA	T	PASS	intron_variant	MODIFIER	LOC111097766	111097766	transcript	XR_002630851.1	pseudogene	1	n.1228+14162delT
10	58974844	T	G	PASS	intron_variant	MODIFIER	LOC111097766	111097766	transcript	XR_002630852.1	pseudogene	1	n.1228+13889A>C
10	58974844	T	G	PASS	intron_variant	MODIFIER	LOC102154583	102154583	transcript	XR_002630845.1	pseudogene	3	n.208+30739T>G
10	58974844	T	G	PASS	intron_variant	MODIFIER	LOC111097766	111097766	transcript	XR_002630851.1	pseudogene	1	n.1228+13889A>C
10	58976749	G	T	GATKstd	intron_variant	MODIFIER	LOC111097766	111097766	transcript	XR_002630852.1	pseudogene	1	n.1228+11984C>A
10	58976749	G	T	GATKstd	intron_variant	MODIFIER	LOC102154583	102154583	transcript	XR_002630845.1	pseudogene	3	n.208+32644G>T
10	58976749	G	T	GATKstd	intron_variant	MODIFIER	LOC111097766	111097766	transcript	XR_002630851.1	pseudogene	1	n.1228+11984C>A
10	58977389	A	T	PASS	intron_variant	MODIFIER	LOC111097766	111097766	transcript	XR_002630852.1	pseudogene	1	n.1228+11344T>A
10	58977389	A	T	PASS	intron_variant	MODIFIER	LOC102154583	102154583	transcript	XR_002630845.1	pseudogene	3	n.208+33284A>T
10	58977389	A	T	PASS	intron_variant	MODIFIER	LOC111097766	111097766	transcript	XR_002630851.1	pseudogene	1	n.1228+11344T>A
10	58977588	A	C	GATKstd	intron_variant	MODIFIER	LOC111097766	111097766	transcript	XR_002630852.1	pseudogene	1	n.1228+11145T>G
10	58977588	A	C	GATKstd	intron_variant	MODIFIER	LOC102154583	102154583	transcript	XR_002630845.1	pseudogene	3	n.208+33483A>C
10	58977588	A	C	GATKstd	intron_variant	MODIFIER	LOC111097766	111097766	transcript	XR_002630851.1	pseudogene	1	n.1228+11145T>G
10	58979332	G	A	PASS	intron_variant	MODIFIER	LOC111097766	111097766	transcript	XR_002630852.1	pseudogene	1	n.1228+9401C>T
10	58979332	G	A	PASS	intron_variant	MODIFIER	LOC102154583	102154583	transcript	XR_002630845.1	pseudogene	3	n.208+35227G>A
10	58979332	G	A	PASS	intron_variant	MODIFIER	LOC111097766	111097766	transcript	XR_002630851.1	pseudogene	1	n.1228+9401C>T
10	58979450	C	A	PASS	intron_variant	MODIFIER	LOC111097766	111097766	transcript	XR_002630852.1	pseudogene	1	n.1228+9283G>T
10	58979450	C	A	PASS	intron_variant	MODIFIER	LOC102154583	102154583	transcript	XR_002630845.1	pseudogene	3	n.208+35345C>A
10	58979450	C	A	PASS	intron_variant	MODIFIER	LOC111097766	111097766	transcript	XR_002630851.1	pseudogene	1	n.1228+9283G>T
10	58979550	G	GTTAA	PASS	intron_variant	MODIFIER	LOC111097766	111097766	transcript	XR_002630852.1	pseudogene	1	n.1228+9182_1228+9183insTTAA
10	58979550	G	GTTAA	PASS	intron_variant	MODIFIER	LOC102154583	102154583	transcript	XR_002630845.1	pseudogene	3	n.208+35445_208+35446insTTAA
10	58979550	G	GTTAA	PASS	intron_variant	MODIFIER	LOC111097766	111097766	transcript	XR_002630851.1	pseudogene	1	n.1228+9182_1228+9183insTTAA
10	58981476	C	T	GATKstd	intron_variant	MODIFIER	LOC111097766	111097766	transcript	XR_002630852.1	pseudogene	1	n.1228+7257G>A
10	58981476	C	T	GATKstd	intron_variant	MODIFIER	LOC102154583	102154583	transcript	XR_002630845.1	pseudogene	3	n.208+37371C>T
10	58981476	C	T	GATKstd	intron_variant	MODIFIER	LOC111097766	111097766	transcript	XR_002630851.1	pseudogene	1	n.1228+7257G>A
10	58984212	T	C	PASS	intron_variant	MODIFIER	LOC111097766	111097766	transcript	XR_002630852.1	pseudogene	1	n.1228+4521A>G
10	58984212	T	C	PASS	intron_variant	MODIFIER	LOC102154583	102154583	transcript	XR_002630845.1	pseudogene	3	n.208+40107T>C
10	58984212	T	C	PASS	intron_variant	MODIFIER	LOC111097766	111097766	transcript	XR_002630851.1	pseudogene	1	n.1228+4521A>G
10	58986281	A	AAAT	PASS	intron_variant	MODIFIER	LOC111097766	111097766	transcript	XR_002630852.1	pseudogene	1	n.1228+2451_1228+2452insATT
10	58986281	A	AAAT	PASS	intron_variant	MODIFIER	LOC102154583	102154583	transcript	XR_002630845.1	pseudogene	3	n.208+42176_208+42177insAAT
10	58986281	A	AAAT	PASS	intron_variant	MODIFIER	LOC111097766	111097766	transcript	XR_002630851.1	pseudogene	1	n.1228+2451_1228+2452insATT
10	58990190	A	G	PASS	upstream_gene_variant	MODIFIER	LOC111097766	111097766	transcript	XR_002630852.1	pseudogene	-1	n.-230T>C
10	58990190	A	G	PASS	upstream_gene_variant	MODIFIER	LOC111097768	111097768	transcript	XR_002630854.1	pseudogene	-1	n.-1740A>G
10	58990190	A	G	PASS	upstream_gene_variant	MODIFIER	LOC111097766	111097766	transcript	XR_002630851.1	pseudogene	-1	n.-230T>C
10	58990190	A	G	PASS	intron_variant	MODIFIER	LOC102154583	102154583	transcript	XR_002630845.1	pseudogene	3	n.208+46085A>G
10	58990213	T	C	PASS	upstream_gene_variant	MODIFIER	LOC111097766	111097766	transcript	XR_002630852.1	pseudogene	-1	n.-253A>G
10	58990213	T	C	PASS	upstream_gene_variant	MODIFIER	LOC111097768	111097768	transcript	XR_002630854.1	pseudogene	-1	n.-1717T>C
10	58990213	T	C	PASS	upstream_gene_variant	MODIFIER	LOC111097766	111097766	transcript	XR_002630851.1	pseudogene	-1	n.-253A>G
10	58990213	T	C	PASS	intron_variant	MODIFIER	LOC102154583	102154583	transcript	XR_002630845.1	pseudogene	3	n.208+46108T>C
10	58990886	T	C	PASS	upstream_gene_variant	MODIFIER	LOC111097766	111097766	transcript	XR_002630852.1	pseudogene	-1	n.-926A>G
10	58990886	T	C	PASS	upstream_gene_variant	MODIFIER	LOC111097768	111097768	transcript	XR_002630854.1	pseudogene	-1	n.-1044T>C
10	58990886	T	C	PASS	upstream_gene_variant	MODIFIER	LOC111097766	111097766	transcript	XR_002630851.1	pseudogene	-1	n.-926A>G
10	58990886	T	C	PASS	intron_variant	MODIFIER	LOC102154583	102154583	transcript	XR_002630845.1	pseudogene	3	n.208+46781T>C
10	58991394	AT	A	PASS	upstream_gene_variant	MODIFIER	LOC111097766	111097766	transcript	XR_002630852.1	pseudogene	-1	n.-1435delA
10	58991394	AT	A	PASS	upstream_gene_variant	MODIFIER	LOC111097768	111097768	transcript	XR_002630854.1	pseudogene	-1	n.-535delT
10	58991394	AT	A	PASS	upstream_gene_variant	MODIFIER	LOC111097766	111097766	transcript	XR_002630851.1	pseudogene	-1	n.-1435delA
10	58991394	AT	A	PASS	intron_variant	MODIFIER	LOC102154583	102154583	transcript	XR_002630845.1	pseudogene	3	n.208+47290delT
10	58993046	T	G	GATKstd	upstream_gene_variant	MODIFIER	LOC111097766	111097766	transcript	XR_002630852.1	pseudogene	-1	n.-3086A>C
10	58993046	T	G	GATKstd	upstream_gene_variant	MODIFIER	LOC111097766	111097766	transcript	XR_002630851.1	pseudogene	-1	n.-3086A>C
10	58993046	T	G	GATKstd	downstream_gene_variant	MODIFIER	LOC111097768	111097768	transcript	XR_002630854.1	pseudogene	-1	n.*438T>G
10	58993046	T	G	GATKstd	intron_variant	MODIFIER	LOC102154583	102154583	transcript	XR_002630845.1	pseudogene	3	n.209-46788T>G
10	58993183	A	G	GATKstd	upstream_gene_variant	MODIFIER	LOC111097766	111097766	transcript	XR_002630852.1	pseudogene	-1	n.-3223T>C
10	58993183	A	G	GATKstd	upstream_gene_variant	MODIFIER	LOC111097766	111097766	transcript	XR_002630851.1	pseudogene	-1	n.-3223T>C
10	58993183	A	G	GATKstd	downstream_gene_variant	MODIFIER	LOC111097768	111097768	transcript	XR_002630854.1	pseudogene	-1	n.*575A>G
10	58993183	A	G	GATKstd	intron_variant	MODIFIER	LOC102154583	102154583	transcript	XR_002630845.1	pseudogene	3	n.209-46651A>G
10	58993953	A	ATG	PASS	upstream_gene_variant	MODIFIER	LOC111097766	111097766	transcript	XR_002630852.1	pseudogene	-1	n.-3994_-3993insCA
10	58993953	A	ATG	PASS	upstream_gene_variant	MODIFIER	LOC111097766	111097766	transcript	XR_002630851.1	pseudogene	-1	n.-3994_-3993insCA
10	58993953	A	ATG	PASS	downstream_gene_variant	MODIFIER	LOC111097768	111097768	transcript	XR_002630854.1	pseudogene	-1	n.*1345_*1346insTG
10	58993953	A	ATG	PASS	intron_variant	MODIFIER	LOC102154583	102154583	transcript	XR_002630845.1	pseudogene	3	n.209-45881_209-45880insTG
10	58995004	TC	T	PASS	downstream_gene_variant	MODIFIER	LOC111097768	111097768	transcript	XR_002630854.1	pseudogene	-1	n.*2397delC
10	58995004	TC	T	PASS	intron_variant	MODIFIER	LOC102154583	102154583	transcript	XR_002630845.1	pseudogene	3	n.209-44829delC
10	58995767	G	A	GATKstd	downstream_gene_variant	MODIFIER	LOC111097768	111097768	transcript	XR_002630854.1	pseudogene	-1	n.*3159G>A
10	58995767	G	A	GATKstd	intron_variant	MODIFIER	LOC102154583	102154583	transcript	XR_002630845.1	pseudogene	3	n.209-44067G>A
10	58998982	A	G	GATKstd	intron_variant	MODIFIER	LOC102154583	102154583	transcript	XR_002630845.1	pseudogene	3	n.209-40852A>G
10	58999341	C	G	GATKstd	intron_variant	MODIFIER	LOC102154583	102154583	transcript	XR_002630845.1	pseudogene	3	n.209-40493C>G
10	58999549	G	GA	PASS	intron_variant	MODIFIER	LOC102154583	102154583	transcript	XR_002630845.1	pseudogene	3	n.209-40285_209-40284insA
10	58999955	GA	G	PASS	intron_variant	MODIFIER	LOC102154583	102154583	transcript	XR_002630845.1	pseudogene	3	n.209-39878delA
10	59000001	G	A	PASS	intron_variant	MODIFIER	LOC102154583	102154583	transcript	XR_002630845.1	pseudogene	3	n.209-39833G>A
10	59000121	A	G	GATKstd	intron_variant	MODIFIER	LOC102154583	102154583	transcript	XR_002630845.1	pseudogene	3	n.209-39713A>G
10	59000126	C	T	GATKstd	intron_variant	MODIFIER	LOC102154583	102154583	transcript	XR_002630845.1	pseudogene	3	n.209-39708C>T
10	59000203	AAAC	A	PASS	intron_variant	MODIFIER	LOC102154583	102154583	transcript	XR_002630845.1	pseudogene	3	n.209-39630_209-39628delAAC
10	59001102	G	A	GATKstd	intron_variant	MODIFIER	LOC102154583	102154583	transcript	XR_002630845.1	pseudogene	3	n.209-38732G>A
10	59004556	G	T	GATKstd	intron_variant	MODIFIER	LOC102154583	102154583	transcript	XR_002630845.1	pseudogene	3	n.209-35278G>T
10	59004875	AGAT	A	PASS	intron_variant	MODIFIER	LOC102154583	102154583	transcript	XR_002630845.1	pseudogene	3	n.209-34958_209-34956delGAT
10	59008245	GAT	G	PASS	intron_variant	MODIFIER	LOC102154583	102154583	transcript	XR_002630845.1	pseudogene	3	n.209-31588_209-31587delAT
10	59008470	T	C	PASS	intron_variant	MODIFIER	LOC102154583	102154583	transcript	XR_002630845.1	pseudogene	3	n.209-31364T>C
10	59008472	C	T	PASS	intron_variant	MODIFIER	LOC102154583	102154583	transcript	XR_002630845.1	pseudogene	3	n.209-31362C>T
10	59009241	G	A	GATKstd	intron_variant	MODIFIER	LOC102154583	102154583	transcript	XR_002630845.1	pseudogene	3	n.209-30593G>A
10	59009656	C	A	PASS	intron_variant	MODIFIER	LOC102154583	102154583	transcript	XR_002630845.1	pseudogene	3	n.209-30178C>A
10	59009686	C	CATAA	PASS	intron_variant	MODIFIER	LOC102154583	102154583	transcript	XR_002630845.1	pseudogene	3	n.209-30148_209-30147insATAA
10	59010114	AT	A	PASS	intron_variant	MODIFIER	LOC102154583	102154583	transcript	XR_002630845.1	pseudogene	3	n.209-29719delT
10	59010268	A	T	PASS	intron_variant	MODIFIER	LOC102154583	102154583	transcript	XR_002630845.1	pseudogene	3	n.209-29566A>T
10	59010413	C	T	GATKstd	intron_variant	MODIFIER	LOC102154583	102154583	transcript	XR_002630845.1	pseudogene	3	n.209-29421C>T
10	59013975	ATG	A	PASS	intron_variant	MODIFIER	LOC102154583	102154583	transcript	XR_002630845.1	pseudogene	3	n.209-25858_209-25857delTG
10	59016450	A	G	GATKstd	intron_variant	MODIFIER	LOC102154583	102154583	transcript	XR_002630845.1	pseudogene	3	n.209-23384A>G
10	59018735	C	T	GATKstd	intron_variant	MODIFIER	LOC102154583	102154583	transcript	XR_002630845.1	pseudogene	3	n.209-21099C>T
10	59019105	T	C	GATKstd	intron_variant	MODIFIER	LOC102154583	102154583	transcript	XR_002630845.1	pseudogene	3	n.209-20729T>C
10	59019864	T	C	GATKstd	intron_variant	MODIFIER	LOC102154583	102154583	transcript	XR_002630845.1	pseudogene	3	n.209-19970T>C
10	59020879	T	C	GATKstd	intron_variant	MODIFIER	LOC102154583	102154583	transcript	XR_002630845.1	pseudogene	3	n.209-18955T>C
10	59021169	T	C	GATKstd	intron_variant	MODIFIER	LOC102154583	102154583	transcript	XR_002630845.1	pseudogene	3	n.209-18665T>C
10	59021786	G	A	PASS	intron_variant	MODIFIER	LOC102154583	102154583	transcript	XR_002630845.1	pseudogene	3	n.209-18048G>A
10	59023094	C	G	PASS	intron_variant	MODIFIER	LOC102154583	102154583	transcript	XR_002630845.1	pseudogene	3	n.209-16740C>G
10	59023314	C	T	PASS	intron_variant	MODIFIER	LOC102154583	102154583	transcript	XR_002630845.1	pseudogene	3	n.209-16520C>T
10	59024785	G	GA	PASS	intron_variant	MODIFIER	LOC102154583	102154583	transcript	XR_002630845.1	pseudogene	3	n.209-15049_209-15048insA
10	59027192	T	C	PASS	intron_variant	MODIFIER	LOC102154583	102154583	transcript	XR_002630845.1	pseudogene	3	n.209-12642T>C
10	59029336	A	G	GATKstd	intron_variant	MODIFIER	LOC102154583	102154583	transcript	XR_002630845.1	pseudogene	3	n.209-10498A>G
10	59030106	G	C	GATKstd	intron_variant	MODIFIER	LOC102154583	102154583	transcript	XR_002630845.1	pseudogene	3	n.209-9728G>C
10	59031841	A	G	GATKstd	intron_variant	MODIFIER	LOC102154583	102154583	transcript	XR_002630845.1	pseudogene	3	n.209-7993A>G
10	59033670	G	A	GATKstd	intron_variant	MODIFIER	LOC102154583	102154583	transcript	XR_002630845.1	pseudogene	3	n.209-6164G>A
10	59033961	G	A	PASS	intron_variant	MODIFIER	LOC102154583	102154583	transcript	XR_002630845.1	pseudogene	3	n.209-5873G>A
10	59035586	G	A	PASS	intron_variant	MODIFIER	LOC102154583	102154583	transcript	XR_002630845.1	pseudogene	3	n.209-4248G>A
10	59035810	A	G	GATKstd	intron_variant	MODIFIER	LOC102154583	102154583	transcript	XR_002630845.1	pseudogene	3	n.209-4024A>G
10	59036045	G	A	PASS	intron_variant	MODIFIER	LOC102154583	102154583	transcript	XR_002630845.1	pseudogene	3	n.209-3789G>A
10	59036994	G	T	GATKstd	intron_variant	MODIFIER	LOC102154583	102154583	transcript	XR_002630845.1	pseudogene	3	n.209-2840G>T
10	59038082	A	T	GATKstd	intron_variant	MODIFIER	LOC102154583	102154583	transcript	XR_002630845.1	pseudogene	3	n.209-1752A>T
10	59038124	G	T	GATKstd	intron_variant	MODIFIER	LOC102154583	102154583	transcript	XR_002630845.1	pseudogene	3	n.209-1710G>T
10	59038376	G	T	GATKstd	intron_variant	MODIFIER	LOC102154583	102154583	transcript	XR_002630845.1	pseudogene	3	n.209-1458G>T
10	59038485	A	T	GATKstd	intron_variant	MODIFIER	LOC102154583	102154583	transcript	XR_002630845.1	pseudogene	3	n.209-1349A>T
10	59040047	G	A	GATKstd	intron_variant	MODIFIER	LOC102154583	102154583	transcript	XR_002630845.1	pseudogene	4	n.341+81G>A
10	59040159	A	T	GATKstd	intron_variant	MODIFIER	LOC102154583	102154583	transcript	XR_002630845.1	pseudogene	4	n.341+193A>T
10	59040160	A	C	GATKstd	intron_variant	MODIFIER	LOC102154583	102154583	transcript	XR_002630845.1	pseudogene	4	n.341+194A>C
10	59040352	GGGAA	G	PASS	intron_variant	MODIFIER	LOC102154583	102154583	transcript	XR_002630845.1	pseudogene	4	n.341+387_341+390delGGAA
10	59040637	C	T	GATKstd	intron_variant	MODIFIER	LOC102154583	102154583	transcript	XR_002630845.1	pseudogene	4	n.341+671C>T
10	59041414	G	T	GATKstd	non_coding_transcript_exon_variant	MODIFIER	LOC102154583	102154583	transcript	XR_002630845.1	pseudogene	5	n.439G>T
10	59041754	A	G	PASS	intron_variant	MODIFIER	LOC102154583	102154583	transcript	XR_002630845.1	pseudogene	5	n.525+254A>G
10	59042327	A	G	GATKstd	intron_variant	MODIFIER	LOC102154583	102154583	transcript	XR_002630845.1	pseudogene	5	n.525+827A>G
10	59043464	G	T	PASS	intron_variant	MODIFIER	LOC102154583	102154583	transcript	XR_002630845.1	pseudogene	5	n.525+1964G>T
10	59043835	C	CAG	PASS	intron_variant	MODIFIER	LOC102154583	102154583	transcript	XR_002630845.1	pseudogene	5	n.525+2335_525+2336insAG
10	59045709	C	CT	PASS	intron_variant	MODIFIER	LOC102154583	102154583	transcript	XR_002630845.1	pseudogene	5	n.525+4209_525+4210insT
10	59045962	C	T	GATKstd	intron_variant	MODIFIER	LOC102154583	102154583	transcript	XR_002630845.1	pseudogene	5	n.525+4462C>T
10	59046675	T	C	GATKstd	intron_variant	MODIFIER	LOC102154583	102154583	transcript	XR_002630845.1	pseudogene	5	n.525+5175T>C
10	59047718	T	A	GATKstd	intron_variant	MODIFIER	LOC102154583	102154583	transcript	XR_002630845.1	pseudogene	5	n.525+6218T>A
10	59048386	G	A	PASS	intron_variant	MODIFIER	LOC102154583	102154583	transcript	XR_002630845.1	pseudogene	5	n.525+6886G>A
10	59048913	G	A	PASS	intron_variant	MODIFIER	LOC102154583	102154583	transcript	XR_002630845.1	pseudogene	5	n.525+7413G>A
10	59050798	A	C	PASS	intron_variant	MODIFIER	LOC102154583	102154583	transcript	XR_002630845.1	pseudogene	5	n.525+9298A>C
10	59052486	A	T	PASS	intron_variant	MODIFIER	LOC102154583	102154583	transcript	XR_002630845.1	pseudogene	5	n.525+10986A>T
10	59053133	C	T	GATKstd	intron_variant	MODIFIER	LOC102154583	102154583	transcript	XR_002630845.1	pseudogene	5	n.525+11633C>T
10	59053333	T	TC	PASS	intron_variant	MODIFIER	LOC102154583	102154583	transcript	XR_002630845.1	pseudogene	5	n.525+11833_525+11834insC
10	59053547	A	C	GATKstd	intron_variant	MODIFIER	LOC102154583	102154583	transcript	XR_002630845.1	pseudogene	5	n.525+12047A>C
10	59054183	T	TCTAA	PASS	intron_variant	MODIFIER	LOC102154583	102154583	transcript	XR_002630845.1	pseudogene	5	n.525+12683_525+12684insCTAA
10	59054775	T	C	GATKstd	intron_variant	MODIFIER	LOC102154583	102154583	transcript	XR_002630845.1	pseudogene	5	n.525+13275T>C
10	59054831	A	G	GATKstd	intron_variant	MODIFIER	LOC102154583	102154583	transcript	XR_002630845.1	pseudogene	5	n.525+13331A>G
10	59055121	C	CTACTATTACTATTACTAT	PASS	intron_variant	MODIFIER	LOC102154583	102154583	transcript	XR_002630845.1	pseudogene	5	n.525+13621_525+13622insTACTATTACTATTACTAT
10	59055406	TG	T	PASS	intron_variant	MODIFIER	LOC102154583	102154583	transcript	XR_002630845.1	pseudogene	5	n.525+13907delG
10	59055409	G	T	PASS	intron_variant	MODIFIER	LOC102154583	102154583	transcript	XR_002630845.1	pseudogene	5	n.525+13909G>T
10	59055672	A	G	PASS	intron_variant	MODIFIER	LOC102154583	102154583	transcript	XR_002630845.1	pseudogene	5	n.525+14172A>G
10	59055840	C	T	GATKstd	intron_variant	MODIFIER	LOC102154583	102154583	transcript	XR_002630845.1	pseudogene	5	n.525+14340C>T
10	59056297	AAAC	A	PASS	intron_variant	MODIFIER	LOC102154583	102154583	transcript	XR_002630845.1	pseudogene	5	n.525+14798_525+14800delAAC
10	59056310	A	C	PASS	intron_variant	MODIFIER	LOC102154583	102154583	transcript	XR_002630845.1	pseudogene	5	n.525+14810A>C
10	59056544	C	T	PASS	intron_variant	MODIFIER	LOC102154583	102154583	transcript	XR_002630845.1	pseudogene	5	n.525+15044C>T
10	59058068	G	A	GATKstd	intron_variant	MODIFIER	LOC102154583	102154583	transcript	XR_002630845.1	pseudogene	5	n.525+16568G>A
10	59058154	A	G	GATKstd	intron_variant	MODIFIER	LOC102154583	102154583	transcript	XR_002630845.1	pseudogene	5	n.525+16654A>G
10	59058546	A	G	GATKstd	intron_variant	MODIFIER	LOC102154583	102154583	transcript	XR_002630845.1	pseudogene	5	n.525+17046A>G
10	59062738	G	C	GATKstd	intron_variant	MODIFIER	LOC102154583	102154583	transcript	XR_002630845.1	pseudogene	5	n.525+21238G>C
10	59064354	C	T	GATKstd	intron_variant	MODIFIER	LOC102154583	102154583	transcript	XR_002630845.1	pseudogene	5	n.525+22854C>T
10	59066587	C	T	GATKstd	intron_variant	MODIFIER	LOC102154583	102154583	transcript	XR_002630845.1	pseudogene	5	n.526-21905C>T
10	59067478	A	G	GATKstd	intron_variant	MODIFIER	LOC102154583	102154583	transcript	XR_002630845.1	pseudogene	5	n.526-21014A>G
10	59071045	A	G	GATKstd	intron_variant	MODIFIER	LOC102154583	102154583	transcript	XR_002630845.1	pseudogene	5	n.526-17447A>G
10	59074661	C	T	GATKstd	intron_variant	MODIFIER	LOC102154583	102154583	transcript	XR_002630845.1	pseudogene	5	n.526-13831C>T
10	59077778	C	A	GATKstd	intron_variant	MODIFIER	LOC102154583	102154583	transcript	XR_002630845.1	pseudogene	5	n.526-10714C>A
10	59079957	C	T	GATKstd	intron_variant	MODIFIER	LOC102154583	102154583	transcript	XR_002630845.1	pseudogene	5	n.526-8535C>T
10	59086094	G	GTAGTCAGGCAGCTTTTTTTTTTTTTTTTTTTTTTTTTTTTTTTTTTTTTTTT	PASS	intron_variant	MODIFIER	LOC102154583	102154583	transcript	XR_002630845.1	pseudogene	5	n.526-2398_526-2397insTAGTCAGGCAGCTTTTTTTTTTTTTTTTTTTTTTTTTTTTTTTTTTTTTTTT
10	59088999	C	T	GATKstd	intron_variant	MODIFIER	LOC102154583	102154583	transcript	XR_002630845.1	pseudogene	6	n.676+357C>T
10	59093169	G	A	GATKstd	intron_variant	MODIFIER	LOC102154583	102154583	transcript	XR_002630845.1	pseudogene	6	n.676+4527G>A
10	59094961	C	A	GATKstd	intron_variant	MODIFIER	LOC102154583	102154583	transcript	XR_002630845.1	pseudogene	6	n.676+6319C>A
10	59147499	T	C	GATKstd	intron_variant	MODIFIER	LOC102154583	102154583	transcript	XR_002630846.1	pseudogene	2	n.1616+9604T>C
10	59147499	T	C	GATKstd	intron_variant	MODIFIER	LOC102154583	102154583	transcript	XR_002630845.1	pseudogene	8	n.911+9604T>C
10	59174030	CAGTT	C	PASS	intron_variant	MODIFIER	LOC102154583	102154583	transcript	XR_002630846.1	pseudogene	3	n.1791+8649_1791+8652delAGTT
10	59174030	CAGTT	C	PASS	intron_variant	MODIFIER	LOC102154583	102154583	transcript	XR_002630845.1	pseudogene	10	n.1195+3685_1195+3688delAGTT
10	68059296	G	T	PASS	upstream_gene_variant	MODIFIER	LOC111097808	111097808	transcript	XR_002630964.1	pseudogene	-1	n.-4797C>A
10	68059296	G	T	PASS	upstream_gene_variant	MODIFIER	LOC111097808	111097808	transcript	XR_002630965.1	pseudogene	-1	n.-4797C>A
10	68059296	G	T	PASS	intergenic_region	MODIFIER	LOC111097808-GFPT1	111097808-474624	intergenic_region	111097808-474624		-1	n.68059296G>T
10	68693482	C	A	PASS	downstream_gene_variant	MODIFIER	LOC111097866	111097866	transcript	XR_002631067.1	pseudogene	-1	n.*478C>A
10	68693482	C	A	PASS	intergenic_region	MODIFIER	LOC111097866-LOC102151723	111097866-102151723	intergenic_region	111097866-102151723		-1	n.68693482C>A
11	256385	G	GCC	PASS	intron_variant	MODIFIER	BTNL9	491672	transcript	XM_005626271.3	protein_coding	7	c.925+6408_925+6409insCC
11	7514164	TG	T	PASS	intergenic_region	MODIFIER	LOC111097917-LOC100687242	111097917-100687242	intergenic_region	111097917-100687242		-1	n.7514165delG
11	9479450	C	T	PASS	intergenic_region	MODIFIER	LOC102151165-LOC102155120	102151165-102155120	intergenic_region	102151165-102155120		-1	n.9479450C>T
11	9479452	A	C	PASS	intergenic_region	MODIFIER	LOC102151165-LOC102155120	102151165-102155120	intergenic_region	102151165-102155120		-1	n.9479452A>C
11	10852189	G	GT	PASS	intergenic_region	MODIFIER	LOC100856583-LOC111097922	100856583-111097922	intergenic_region	100856583-111097922		-1	n.10852189_10852190insT
11	17195220	T	TTTTTTTATTGGTGTTCAATTTAC	PASS	intron_variant	MODIFIER	SLC12A2	481490	transcript	XM_538611.6	protein_coding	6	c.1017+899_1017+900insTTTTTTATTGGTGTTCAATTTAC
11	18017791	C	CCCCCCT	PASS	intron_variant	MODIFIER	ISOC1	100688371	transcript	XM_003431591.4	protein_coding	2	c.325-3416_325-3415insCCCCCT
11	33851687	G	GCC	PASS	intergenic_region	MODIFIER	MPDZ-LOC111098042	474708-111098042	intergenic_region	474708-111098042		-1	n.33851687_33851688insCC
11	33851699	G	GCCGTCGCGGGGCCCCTCCTACGCGAGGCAGTCCCAGCCTGCATTTCCATGTGATCTGCTGGAAAGAATAGCCCGGCCTTTGTGCCTCTGCAAAGAACGCA	PASS	intergenic_region	MODIFIER	MPDZ-LOC111098042	474708-111098042	intergenic_region	474708-111098042		-1	n.33851699_33851700insCCGTCGCGGGGCCCCTCCTACGCGAGGCAGTCCCAGCCTGCATTTCCATGTGATCTGCTGGAAAGAATAGCCCGGCCTTTGTGCCTCTGCAAAGAACGCA
11	40735616	G	A	GATKstd	upstream_gene_variant	MODIFIER	LOC100687692	100687692	transcript	XM_003431640.3	protein_coding	-1	c.-3507C>T
11	40735616	G	A	GATKstd	intergenic_region	MODIFIER	LOC100687692-LOC100687778	100687692-100687778	intergenic_region	100687692-100687778		-1	n.40735616G>A
11	43504278	G	C	PASS	intergenic_region	MODIFIER	LOC111098069-LOC100686955	111098069-100686955	intergenic_region	111098069-100686955		-1	n.43504278G>C
11	48780853	C	G	PASS	intergenic_region	MODIFIER	LOC111097947-LOC111098079	111097947-111098079	intergenic_region	111097947-111098079		-1	n.48780853C>G
11	60935424	G	C	PASS	intron_variant	MODIFIER	LOC111098116	111098116	transcript	XR_002631643.1	pseudogene	7	n.1191-11992C>G
12	1697504	G	A	PASS	intergenic_region	MODIFIER	LOC481727-LOC111098215	481727-111098215	intergenic_region	481727-111098215		-1	n.1697504G>A
12	5046145	C	CACTGCCTATG	PASS	downstream_gene_variant	MODIFIER	LOC106559591	106559591	transcript	106559591	pseudogene	-1	n.*3772_*3773insACTGCCTATG
12	5046145	C	CACTGCCTATG	PASS	intergenic_region	MODIFIER	LOC106559591-SLC26A8	106559591-474888	intergenic_region	106559591-474888		-1	n.5046145_5046146insACTGCCTATG
12	7991168	C	G	PASS	downstream_gene_variant	MODIFIER	LOC111098246	111098246	transcript	XR_002631829.1	pseudogene	-1	n.*3969C>G
12	7991168	C	G	PASS	intron_variant	MODIFIER	LOC111098246	111098246	transcript	XR_002631828.1	pseudogene	3	n.2283+145C>G
12	16606615	G	T	PASS	intergenic_region	MODIFIER	LOC100686422-LOC610048	100686422-610048	intergenic_region	100686422-610048		-1	n.16606615G>T
12	21423569	C	CG	PASS	intron_variant	MODIFIER	LRRC1	481847	transcript	XM_003639435.4	protein_coding	15	c.1411-570_1411-569insG
12	22461227	C	CT	PASS	intergenic_region	MODIFIER	LOC100688283-HCRTR2	100688283-399545	intergenic_region	100688283-399545		-1	n.22461227_22461228insT
12	39722615	G	A	PASS	intergenic_region	MODIFIER	LOC111098143-LOC106559590	111098143-106559590	intergenic_region	111098143-106559590		-1	n.39722615G>A
12	39722616	A	T	PASS	intergenic_region	MODIFIER	LOC111098143-LOC106559590	111098143-106559590	intergenic_region	111098143-106559590		-1	n.39722616A>T
12	39894764	A	T	PASS	downstream_gene_variant	MODIFIER	PHIP	474976	transcript	XM_014118118.2	protein_coding	-1	c.*9839T>A
12	39894764	A	T	PASS	downstream_gene_variant	MODIFIER	PHIP	474976	transcript	XM_022426272.1	protein_coding	-1	c.*9839T>A
12	39894764	A	T	PASS	downstream_gene_variant	MODIFIER	PHIP	474976	transcript	XM_022426271.1	protein_coding	-1	c.*9839T>A
12	39894764	A	T	PASS	downstream_gene_variant	MODIFIER	PHIP	474976	transcript	XM_014118119.2	protein_coding	-1	c.*9839T>A
12	39894764	A	T	PASS	intergenic_region	MODIFIER	LOC102153751-PHIP	102153751-474976	intergenic_region	102153751-474976		-1	n.39894764A>T
12	40189562	C	T	PASS	intron_variant	MODIFIER	LOC111098329	111098329	transcript	XR_002632026.1	pseudogene	2	n.287+18598C>T
12	49562474	G	A	PASS	intron_variant	MODIFIER	LOC111098174	111098174	transcript	XR_002631724.1	pseudogene	1	n.88+4406G>A
12	50660831	A	T	PASS	intron_variant	MODIFIER	LOC111098362	111098362	transcript	XR_002632089.1	pseudogene	2	n.238-13393A>T
12	51217003	A	G	PASS	intergenic_region	MODIFIER	LOC111098363-LOC111098176	111098363-111098176	intergenic_region	111098363-111098176		-1	n.51217003A>G
12	51305396	T	C	PASS	intergenic_region	MODIFIER	LOC111098363-LOC111098176	111098363-111098176	intergenic_region	111098363-111098176		-1	n.51305396T>C
12	51305399	CA	C	PASS	intergenic_region	MODIFIER	LOC111098363-LOC111098176	111098363-111098176	intergenic_region	111098363-111098176		-1	n.51305400delA
12	51705081	T	C	GATKstd	intergenic_region	MODIFIER	LOC111098176-EPHA7	111098176-474997	intergenic_region	111098176-474997		-1	n.51705081T>C
12	51782023	A	G	GATKstd	intergenic_region	MODIFIER	LOC111098176-EPHA7	111098176-474997	intergenic_region	111098176-474997		-1	n.51782023A>G
12	51796326	T	C	GATKstd	intergenic_region	MODIFIER	LOC111098176-EPHA7	111098176-474997	intergenic_region	111098176-474997		-1	n.51796326T>C
12	52005298	G	A	PASS	intergenic_region	MODIFIER	LOC111098176-EPHA7	111098176-474997	intergenic_region	111098176-474997		-1	n.52005298G>A
12	52051117	G	T	PASS	intergenic_region	MODIFIER	LOC111098176-EPHA7	111098176-474997	intergenic_region	111098176-474997		-1	n.52051117G>T
12	52301281	T	C	GATKstd	intron_variant	MODIFIER	EPHA7	474997	transcript	XM_848830.5	protein_coding	1	c.98-941A>G
12	52301281	T	C	GATKstd	intron_variant	MODIFIER	EPHA7	474997	transcript	XM_005627643.2	protein_coding	1	c.98-941A>G
12	52301281	T	C	GATKstd	intron_variant	MODIFIER	EPHA7	474997	transcript	XM_005627645.2	protein_coding	1	c.98-941A>G
12	52301281	T	C	GATKstd	intron_variant	MODIFIER	EPHA7	474997	transcript	XM_005627646.3	protein_coding	1	c.98-941A>G
12	52585309	C	T	PASS	intergenic_region	MODIFIER	LOC100687798-LOC100684677	100687798-100684677	intergenic_region	100687798-100684677		-1	n.52585309C>T
12	52589485	TAAATAAATAAAC	T	PASS	intergenic_region	MODIFIER	LOC100687798-LOC100684677	100687798-100684677	intergenic_region	100687798-100684677		-1	n.52589486_52589497delAAATAAATAAAC
12	52605100	T	G	PASS	intergenic_region	MODIFIER	LOC100687798-LOC100684677	100687798-100684677	intergenic_region	100687798-100684677		-1	n.52605100T>G
12	52605478	T	C	PASS	intergenic_region	MODIFIER	LOC100687798-LOC100684677	100687798-100684677	intergenic_region	100687798-100684677		-1	n.52605478T>C
12	52605734	G	A	PASS	intergenic_region	MODIFIER	LOC100687798-LOC100684677	100687798-100684677	intergenic_region	100687798-100684677		-1	n.52605734G>A
12	52606972	A	G	PASS	intergenic_region	MODIFIER	LOC100687798-LOC100684677	100687798-100684677	intergenic_region	100687798-100684677		-1	n.52606972A>G
12	52607581	GA	G	PASS	intergenic_region	MODIFIER	LOC100687798-LOC100684677	100687798-100684677	intergenic_region	100687798-100684677		-1	n.52607582delA
12	52607797	G	A	PASS	intergenic_region	MODIFIER	LOC100687798-LOC100684677	100687798-100684677	intergenic_region	100687798-100684677		-1	n.52607797G>A
12	52608782	G	A	PASS	intergenic_region	MODIFIER	LOC100687798-LOC100684677	100687798-100684677	intergenic_region	100687798-100684677		-1	n.52608782G>A
12	52609680	C	T	PASS	intergenic_region	MODIFIER	LOC100687798-LOC100684677	100687798-100684677	intergenic_region	100687798-100684677		-1	n.52609680C>T
12	52984965	ATGAACTTGGCTGTCTAT	A	PASS	intergenic_region	MODIFIER	LOC100687798-LOC100684677	100687798-100684677	intergenic_region	100687798-100684677		-1	n.52984966_52984982delTGAACTTGGCTGTCTAT
12	54125844	G	A	PASS	intergenic_region	MODIFIER	LOC102151477-MANEA	102151477-481925	intergenic_region	102151477-481925		-1	n.54125844G>A
12	54318284	A	G	PASS	intergenic_region	MODIFIER	LOC111098367-LOC102152033	111098367-102152033	intergenic_region	111098367-102152033		-1	n.54318284A>G
12	63686205	A	T	PASS	upstream_gene_variant	MODIFIER	ATG5	610868	transcript	XM_014118180.2	protein_coding	-1	c.-2890T>A
12	63686205	A	T	PASS	upstream_gene_variant	MODIFIER	ATG5	610868	transcript	XM_005627676.3	protein_coding	-1	c.-2784T>A
12	63686205	A	T	PASS	intron_variant	MODIFIER	ATG5	610868	transcript	XM_005627675.3	protein_coding	1	c.-58-2726T>A
12	63686205	A	T	PASS	intron_variant	MODIFIER	ATG5	610868	transcript	XM_022426415.1	protein_coding	1	c.-58-2726T>A
12	63686205	A	T	PASS	intron_variant	MODIFIER	ATG5	610868	transcript	XM_022426416.1	protein_coding	1	c.-58-2726T>A
12	63686207	G	T	PASS	upstream_gene_variant	MODIFIER	ATG5	610868	transcript	XM_014118180.2	protein_coding	-1	c.-2892C>A
12	63686207	G	T	PASS	upstream_gene_variant	MODIFIER	ATG5	610868	transcript	XM_005627676.3	protein_coding	-1	c.-2786C>A
12	63686207	G	T	PASS	intron_variant	MODIFIER	ATG5	610868	transcript	XM_005627675.3	protein_coding	1	c.-58-2728C>A
12	63686207	G	T	PASS	intron_variant	MODIFIER	ATG5	610868	transcript	XM_022426415.1	protein_coding	1	c.-58-2728C>A
12	63686207	G	T	PASS	intron_variant	MODIFIER	ATG5	610868	transcript	XM_022426416.1	protein_coding	1	c.-58-2728C>A
12	63686209	A	T	PASS	upstream_gene_variant	MODIFIER	ATG5	610868	transcript	XM_014118180.2	protein_coding	-1	c.-2894T>A
12	63686209	A	T	PASS	upstream_gene_variant	MODIFIER	ATG5	610868	transcript	XM_005627676.3	protein_coding	-1	c.-2788T>A
12	63686209	A	T	PASS	intron_variant	MODIFIER	ATG5	610868	transcript	XM_005627675.3	protein_coding	1	c.-58-2730T>A
12	63686209	A	T	PASS	intron_variant	MODIFIER	ATG5	610868	transcript	XM_022426415.1	protein_coding	1	c.-58-2730T>A
12	63686209	A	T	PASS	intron_variant	MODIFIER	ATG5	610868	transcript	XM_022426416.1	protein_coding	1	c.-58-2730T>A
12	64657565	T	TAAAACAGATGACTTAAAAAAAAAAAAAAAAAATAAAAATAAAAAAAAATAAAAAAAAAAAAAAAAAAAAAAAAAA	PASS	intron_variant	MODIFIER	SOBP	612126	transcript	XM_022425765.1	protein_coding	1	c.-19+3602_-19+3603insAAAACAGATGACTTAAAAAAAAAAAAAAAAAATAAAAATAAAAAAAAATAAAAAAAAAAAAAAAAAAAAAAAAAA
12	65355743	A	G	PASS	intron_variant	MODIFIER	AFG1L	481952	transcript	XM_005627682.3	protein_coding	2	c.360+5489A>G
12	65355743	A	G	PASS	intron_variant	MODIFIER	AFG1L	481952	transcript	XM_022426426.1	protein_coding	2	c.360+5489A>G
12	65355743	A	G	PASS	intron_variant	MODIFIER	AFG1L	481952	transcript	XM_005627683.3	protein_coding	2	c.360+5489A>G
12	65355743	A	G	PASS	intron_variant	MODIFIER	AFG1L	481952	transcript	XR_293777.3	pseudogene	2	n.566+5489A>G
12	66349725	A	T	PASS	missense_variant	MODERATE	SMPD2	100856377	transcript	XM_014118188.2	protein_coding	9	c.775A>T	p.Thr259Ser
12	66349725	A	T	PASS	missense_variant	MODERATE	SMPD2	100856377	transcript	XM_014118190.2	protein_coding	8	c.685A>T	p.Thr229Ser
12	66349725	A	T	PASS	upstream_gene_variant	MODIFIER	PPIL6	612243	transcript	XM_005627698.3	protein_coding	-1	c.-9905T>A
12	66349725	A	T	PASS	downstream_gene_variant	MODIFIER	MICAL1	481958	transcript	XM_022425766.1	protein_coding	-1	c.*882T>A
12	66391199	G	A	PASS	intron_variant	MODIFIER	LOC111098392	111098392	transcript	XR_002632160.1	pseudogene	4	n.3876+822G>A
12	66391199	G	A	PASS	intron_variant	MODIFIER	AK9	475022	transcript	XM_005627703.3	protein_coding	37	c.5241-58C>T
12	66391199	G	A	PASS	intron_variant	MODIFIER	AK9	475022	transcript	XM_022426435.1	protein_coding	37	c.5241-58C>T
12	66391199	G	A	PASS	intron_variant	MODIFIER	LOC111098392	111098392	transcript	XR_002632159.1	pseudogene	3	n.3538+822G>A
12	66391199	G	A	PASS	intron_variant	MODIFIER	AK9	475022	transcript	XM_022426434.1	protein_coding	37	c.5238-58C>T
12	66391199	G	A	PASS	intron_variant	MODIFIER	AK9	475022	transcript	XM_022426436.1	protein_coding	36	c.5052-58C>T
12	66391199	G	A	PASS	intron_variant	MODIFIER	AK9	475022	transcript	XM_022426438.1	protein_coding	35	c.4920-58C>T
12	66391199	G	A	PASS	intron_variant	MODIFIER	AK9	475022	transcript	XM_014118192.2	protein_coding	37	c.5241-58C>T
12	66391199	G	A	PASS	intron_variant	MODIFIER	AK9	475022	transcript	XM_022426437.1	protein_coding	37	c.5241-58C>T
12	66495389	G	C	PASS	intron_variant	MODIFIER	AK9	475022	transcript	XM_005627703.3	protein_coding	5	c.331+1116C>G
12	66495389	G	C	PASS	intron_variant	MODIFIER	AK9	475022	transcript	XM_022426435.1	protein_coding	5	c.331+1116C>G
12	66495389	G	C	PASS	intron_variant	MODIFIER	AK9	475022	transcript	XM_022426434.1	protein_coding	5	c.331+1116C>G
12	66495389	G	C	PASS	intron_variant	MODIFIER	AK9	475022	transcript	XM_022426436.1	protein_coding	5	c.331+1116C>G
12	66495389	G	C	PASS	intron_variant	MODIFIER	AK9	475022	transcript	XM_022426438.1	protein_coding	5	c.331+1116C>G
12	66495389	G	C	PASS	intron_variant	MODIFIER	AK9	475022	transcript	XM_014118192.2	protein_coding	5	c.331+1116C>G
12	66495389	G	C	PASS	intron_variant	MODIFIER	AK9	475022	transcript	XM_022426437.1	protein_coding	5	c.331+1116C>G
12	66508019	A	AAAT	PASS	upstream_gene_variant	MODIFIER	FIG4	475023	transcript	NM_001114625.1	protein_coding	-1	c.-1585_-1584insAAT
12	66508019	A	AAAT	PASS	upstream_gene_variant	MODIFIER	FIG4	475023	transcript	XM_022425730.1	protein_coding	-1	c.-797_-796insAAT
12	66508019	A	AAAT	PASS	intron_variant	MODIFIER	AK9	475022	transcript	XM_005627703.3	protein_coding	1	c.-12+362_-12+363insATT
12	66508019	A	AAAT	PASS	intron_variant	MODIFIER	AK9	475022	transcript	XM_022426435.1	protein_coding	1	c.-12+362_-12+363insATT
12	66508019	A	AAAT	PASS	intron_variant	MODIFIER	AK9	475022	transcript	XM_022426434.1	protein_coding	1	c.-12+362_-12+363insATT
12	66508019	A	AAAT	PASS	intron_variant	MODIFIER	AK9	475022	transcript	XM_022426436.1	protein_coding	1	c.-12+362_-12+363insATT
12	66508019	A	AAAT	PASS	intron_variant	MODIFIER	AK9	475022	transcript	XM_022426438.1	protein_coding	1	c.-12+362_-12+363insATT
12	66508019	A	AAAT	PASS	intron_variant	MODIFIER	AK9	475022	transcript	XM_014118192.2	protein_coding	1	c.-12+484_-12+485insATT
12	66508019	A	AAAT	PASS	intron_variant	MODIFIER	AK9	475022	transcript	XM_022426437.1	protein_coding	1	c.-12+362_-12+363insATT
12	68533055	TCC	T	PASS	downstream_gene_variant	MODIFIER	LAMA4	475034	transcript	XM_022426471.1	protein_coding	-1	c.*2902_*2903delGG
12	68533055	TCC	T	PASS	downstream_gene_variant	MODIFIER	LAMA4	475034	transcript	XM_022426472.1	protein_coding	-1	c.*2902_*2903delGG
12	68533055	TCC	T	PASS	intergenic_region	MODIFIER	FAM229B-LAMA4	100683233-475034	intergenic_region	100683233-475034		-1	n.68533056_68533057delCC
12	68533058	TTCC	T	PASS	downstream_gene_variant	MODIFIER	LAMA4	475034	transcript	XM_022426471.1	protein_coding	-1	c.*2898_*2900delGGA
12	68533058	TTCC	T	PASS	downstream_gene_variant	MODIFIER	LAMA4	475034	transcript	XM_022426472.1	protein_coding	-1	c.*2898_*2900delGGA
12	68533058	TTCC	T	PASS	intergenic_region	MODIFIER	FAM229B-LAMA4	100683233-475034	intergenic_region	100683233-475034		-1	n.68533059_68533061delTCC
12	70449922	AC	A	PASS	intergenic_region	MODIFIER	LOC111098408-LOC111098195	111098408-111098195	intergenic_region	111098408-111098195		-1	n.70449923delC
12	70473033	G	C	PASS	intergenic_region	MODIFIER	LOC111098408-LOC111098195	111098408-111098195	intergenic_region	111098408-111098195		-1	n.70473033G>C
12	70473841	C	T	PASS	intergenic_region	MODIFIER	LOC111098408-LOC111098195	111098408-111098195	intergenic_region	111098408-111098195		-1	n.70473841C>T
12	70477442	T	TTTTA	PASS	intergenic_region	MODIFIER	LOC111098408-LOC111098195	111098408-111098195	intergenic_region	111098408-111098195		-1	n.70477442_70477443insTTTA
12	70482775	C	T	PASS	intergenic_region	MODIFIER	LOC111098408-LOC111098195	111098408-111098195	intergenic_region	111098408-111098195		-1	n.70482775C>T
12	70483043	G	A	PASS	intergenic_region	MODIFIER	LOC111098408-LOC111098195	111098408-111098195	intergenic_region	111098408-111098195		-1	n.70483043G>A
12	70880707	TA	T	PASS	intergenic_region	MODIFIER	LOC111098196-LOC111098197	111098196-111098197	intergenic_region	111098196-111098197		-1	n.70880708delA
12	71193796	G	A	PASS	intron_variant	MODIFIER	LOC111098197	111098197	transcript	XR_002631743.1	pseudogene	1	n.842+15919C>T
12	71237314	G	A	GATKstd	intergenic_region	MODIFIER	LOC111098197-LOC111098198	111098197-111098198	intergenic_region	111098197-111098198		-1	n.71237314G>A
12	71319230	A	G	PASS	intergenic_region	MODIFIER	LOC111098197-LOC111098198	111098197-111098198	intergenic_region	111098197-111098198		-1	n.71319230A>G
12	71726530	A	T	PASS	intron_variant	MODIFIER	FRK	481970	transcript	XM_539091.5	protein_coding	1	c.357-21001T>A
12	71828015	G	T	PASS	intron_variant	MODIFIER	NT5DC1	475036	transcript	XM_532271.5	protein_coding	6	c.586+26343G>T
12	71847517	T	A	PASS	intron_variant	MODIFIER	NT5DC1	475036	transcript	XM_532271.5	protein_coding	6	c.587-40287T>A
12	71861087	G	C	PASS	intron_variant	MODIFIER	NT5DC1	475036	transcript	XM_532271.5	protein_coding	6	c.587-26717G>C
13	12376333	A	G	PASS	intergenic_region	MODIFIER	LOC106559613-CSMD3	106559613-482016	intergenic_region	106559613-482016		-1	n.12376333A>G
13	22649481	C	T	GATKstd	intron_variant	MODIFIER	MTSS1	482037	transcript	XM_005627927.3	protein_coding	7	c.473-1094G>A
13	22649481	C	T	GATKstd	intron_variant	MODIFIER	MTSS1	482037	transcript	XM_022426690.1	protein_coding	7	c.425-1094G>A
13	22649481	C	T	GATKstd	intron_variant	MODIFIER	MTSS1	482037	transcript	XM_005627928.3	protein_coding	6	c.461-1094G>A
13	22649481	C	T	GATKstd	intron_variant	MODIFIER	MTSS1	482037	transcript	XM_005627929.3	protein_coding	7	c.473-1094G>A
13	22649481	C	T	GATKstd	intron_variant	MODIFIER	MTSS1	482037	transcript	XM_005627930.3	protein_coding	6	c.461-1094G>A
13	22649481	C	T	GATKstd	intron_variant	MODIFIER	MTSS1	482037	transcript	XM_005627931.3	protein_coding	7	c.473-1094G>A
13	22649481	C	T	GATKstd	intron_variant	MODIFIER	MTSS1	482037	transcript	XM_014118615.2	protein_coding	7	c.473-1094G>A
13	22649481	C	T	GATKstd	intron_variant	MODIFIER	MTSS1	482037	transcript	XM_014118617.2	protein_coding	7	c.473-1094G>A
13	22649481	C	T	GATKstd	intron_variant	MODIFIER	MTSS1	482037	transcript	XM_539158.6	protein_coding	6	c.461-1094G>A
13	22649481	C	T	GATKstd	intron_variant	MODIFIER	MTSS1	482037	transcript	XM_856774.5	protein_coding	7	c.473-1094G>A
13	22758843	ATTTC	A	PASS	intron_variant	MODIFIER	MTSS1	482037	transcript	XM_005627927.3	protein_coding	3	c.208+9341_208+9344delGAAA
13	22758843	ATTTC	A	PASS	intron_variant	MODIFIER	MTSS1	482037	transcript	XM_022426690.1	protein_coding	3	c.160+9341_160+9344delGAAA
13	22758843	ATTTC	A	PASS	intron_variant	MODIFIER	MTSS1	482037	transcript	XM_005627928.3	protein_coding	3	c.208+9341_208+9344delGAAA
13	22758843	ATTTC	A	PASS	intron_variant	MODIFIER	MTSS1	482037	transcript	XM_005627929.3	protein_coding	3	c.208+9341_208+9344delGAAA
13	22758843	ATTTC	A	PASS	intron_variant	MODIFIER	MTSS1	482037	transcript	XM_005627930.3	protein_coding	3	c.208+9341_208+9344delGAAA
13	22758843	ATTTC	A	PASS	intron_variant	MODIFIER	MTSS1	482037	transcript	XM_005627931.3	protein_coding	3	c.208+9341_208+9344delGAAA
13	22758843	ATTTC	A	PASS	intron_variant	MODIFIER	MTSS1	482037	transcript	XM_014118615.2	protein_coding	3	c.208+9341_208+9344delGAAA
13	22758843	ATTTC	A	PASS	intron_variant	MODIFIER	MTSS1	482037	transcript	XM_014118617.2	protein_coding	3	c.208+9341_208+9344delGAAA
13	22758843	ATTTC	A	PASS	intron_variant	MODIFIER	MTSS1	482037	transcript	XM_539158.6	protein_coding	3	c.208+9341_208+9344delGAAA
13	22758843	ATTTC	A	PASS	intron_variant	MODIFIER	MTSS1	482037	transcript	XM_856774.5	protein_coding	3	c.208+9341_208+9344delGAAA
13	23286000	G	A	GATKstd	intron_variant	MODIFIER	NSMCE2	475096	transcript	XM_022427117.1	protein_coding	7	c.618-1948G>A
13	23722120	G	A	PASS	intron_variant	MODIFIER	LOC111098549	111098549	transcript	XR_002632438.1	pseudogene	1	n.180+12445G>A
13	23722122	A	C	PASS	intron_variant	MODIFIER	LOC111098549	111098549	transcript	XR_002632438.1	pseudogene	1	n.180+12447A>C
13	23722125	GAGCCAAA	G	PASS	intron_variant	MODIFIER	LOC111098549	111098549	transcript	XR_002632438.1	pseudogene	1	n.180+12451_180+12457delAGCCAAA
13	23764065	G	A	PASS	intergenic_region	MODIFIER	LOC111098549-LOC102151540	111098549-102151540	intergenic_region	111098549-102151540		-1	n.23764065G>A
13	25340898	ACACACATGCACAGC	A	PASS	intron_variant	MODIFIER	LOC102151812	102151812	transcript	XM_022426702.1	protein_coding	2	c.-96+18011_-96+18024delCACACATGCACAGC
13	25340898	ACACACATGCACAGC	A	PASS	intron_variant	MODIFIER	LOC102151812	102151812	transcript	XR_002632456.1	pseudogene	2	n.475+18011_475+18024delCACACATGCACAGC
13	25340898	ACACACATGCACAGC	A	PASS	intron_variant	MODIFIER	LOC102151812	102151812	transcript	XR_002632457.1	pseudogene	3	n.620+2670_620+2683delCACACATGCACAGC
13	25340898	ACACACATGCACAGC	A	PASS	intron_variant	MODIFIER	LOC102151812	102151812	transcript	XR_002632458.1	pseudogene	2	n.475+18011_475+18024delCACACATGCACAGC
13	25340898	ACACACATGCACAGC	A	PASS	intron_variant	MODIFIER	LOC102151812	102151812	transcript	XR_002632459.1	pseudogene	3	n.620+2670_620+2683delCACACATGCACAGC
13	25340898	ACACACATGCACAGC	A	PASS	intron_variant	MODIFIER	LOC102151812	102151812	transcript	XR_002632465.1	pseudogene	3	n.620+2670_620+2683delCACACATGCACAGC
13	25340898	ACACACATGCACAGC	A	PASS	intron_variant	MODIFIER	LOC102151812	102151812	transcript	XR_002632466.1	pseudogene	3	n.620+2670_620+2683delCACACATGCACAGC
13	25340898	ACACACATGCACAGC	A	PASS	intron_variant	MODIFIER	LOC102151812	102151812	transcript	XR_002632472.1	pseudogene	2	n.475+18011_475+18024delCACACATGCACAGC
13	25340898	ACACACATGCACAGC	A	PASS	intron_variant	MODIFIER	LOC102151812	102151812	transcript	XR_002632470.1	pseudogene	2	n.475+18011_475+18024delCACACATGCACAGC
13	25340898	ACACACATGCACAGC	A	PASS	intron_variant	MODIFIER	LOC102151812	102151812	transcript	XR_002632469.1	pseudogene	2	n.475+18011_475+18024delCACACATGCACAGC
13	25340898	ACACACATGCACAGC	A	PASS	intron_variant	MODIFIER	LOC102151812	102151812	transcript	XR_001317540.2	pseudogene	2	n.475+18011_475+18024delCACACATGCACAGC
13	25340898	ACACACATGCACAGC	A	PASS	intron_variant	MODIFIER	LOC102151812	102151812	transcript	XR_002632468.1	pseudogene	2	n.475+18011_475+18024delCACACATGCACAGC
13	25340898	ACACACATGCACAGC	A	PASS	intron_variant	MODIFIER	LOC102151812	102151812	transcript	XR_002632471.1	pseudogene	2	n.475+18011_475+18024delCACACATGCACAGC
13	25340898	ACACACATGCACAGC	A	PASS	intron_variant	MODIFIER	LOC102151812	102151812	transcript	XR_001317541.2	pseudogene	2	n.474+18011_474+18024delCACACATGCACAGC
13	25340898	ACACACATGCACAGC	A	PASS	intron_variant	MODIFIER	LOC102151812	102151812	transcript	XR_001317535.2	pseudogene	2	n.474+18011_474+18024delCACACATGCACAGC
13	25340898	ACACACATGCACAGC	A	PASS	intron_variant	MODIFIER	LOC102151812	102151812	transcript	XR_001317521.2	pseudogene	2	n.474+18011_474+18024delCACACATGCACAGC
13	25340898	ACACACATGCACAGC	A	PASS	intron_variant	MODIFIER	LOC102151812	102151812	transcript	XR_001317531.2	pseudogene	2	n.474+18011_474+18024delCACACATGCACAGC
13	25340898	ACACACATGCACAGC	A	PASS	intron_variant	MODIFIER	LOC102151812	102151812	transcript	XR_001317539.2	pseudogene	2	n.474+18011_474+18024delCACACATGCACAGC
13	25340898	ACACACATGCACAGC	A	PASS	intron_variant	MODIFIER	LOC102151812	102151812	transcript	XR_002632453.1	pseudogene	2	n.474+18011_474+18024delCACACATGCACAGC
13	25340898	ACACACATGCACAGC	A	PASS	intron_variant	MODIFIER	LOC102151812	102151812	transcript	XR_002632455.1	pseudogene	2	n.474+18011_474+18024delCACACATGCACAGC
13	25340898	ACACACATGCACAGC	A	PASS	intron_variant	MODIFIER	LOC102151812	102151812	transcript	XR_002632460.1	pseudogene	2	n.474+18011_474+18024delCACACATGCACAGC
13	25340898	ACACACATGCACAGC	A	PASS	intron_variant	MODIFIER	LOC102151812	102151812	transcript	XR_001317537.2	pseudogene	2	n.474+18011_474+18024delCACACATGCACAGC
13	25340898	ACACACATGCACAGC	A	PASS	intron_variant	MODIFIER	LOC102151812	102151812	transcript	XR_001317536.2	pseudogene	2	n.473+18011_473+18024delCACACATGCACAGC
13	25340898	ACACACATGCACAGC	A	PASS	intron_variant	MODIFIER	LOC102151812	102151812	transcript	XR_001317520.2	pseudogene	2	n.473+18011_473+18024delCACACATGCACAGC
13	25340898	ACACACATGCACAGC	A	PASS	intron_variant	MODIFIER	LOC102151812	102151812	transcript	XR_001317530.2	pseudogene	2	n.473+18011_473+18024delCACACATGCACAGC
13	25340898	ACACACATGCACAGC	A	PASS	intron_variant	MODIFIER	LOC102151812	102151812	transcript	XM_022426703.1	protein_coding	2	c.-96+18011_-96+18024delCACACATGCACAGC
13	25340898	ACACACATGCACAGC	A	PASS	intron_variant	MODIFIER	LOC102151812	102151812	transcript	XR_002632454.1	pseudogene	2	n.1396+18011_1396+18024delCACACATGCACAGC
13	25340898	ACACACATGCACAGC	A	PASS	intron_variant	MODIFIER	LOC102151812	102151812	transcript	XM_014118629.2	protein_coding	1	c.-96+17554_-96+17567delCACACATGCACAGC
13	25340898	ACACACATGCACAGC	A	PASS	intron_variant	MODIFIER	LOC102151812	102151812	transcript	XM_014118628.2	protein_coding	1	c.-96+16125_-96+16138delCACACATGCACAGC
13	25340898	ACACACATGCACAGC	A	PASS	intron_variant	MODIFIER	LOC102151812	102151812	transcript	XR_002632461.1	pseudogene	2	n.526+2670_526+2683delCACACATGCACAGC
13	25340898	ACACACATGCACAGC	A	PASS	intron_variant	MODIFIER	LOC102151812	102151812	transcript	XR_002632462.1	pseudogene	1	n.366+16125_366+16138delCACACATGCACAGC
13	25340898	ACACACATGCACAGC	A	PASS	intron_variant	MODIFIER	LOC102151812	102151812	transcript	XR_002632464.1	pseudogene	1	n.226+16125_226+16138delCACACATGCACAGC
13	25340898	ACACACATGCACAGC	A	PASS	intron_variant	MODIFIER	LOC102151812	102151812	transcript	XR_002632463.1	pseudogene	2	n.278+2670_278+2683delCACACATGCACAGC
13	25603350	T	G	GATKstd	intergenic_region	MODIFIER	LOC102151812-LOC111098552	102151812-111098552	intergenic_region	102151812-111098552		-1	n.25603350T>G
13	25668282	C	A	PASS	intergenic_region	MODIFIER	LOC102151812-LOC111098552	102151812-111098552	intergenic_region	102151812-111098552		-1	n.25668282C>A
13	26044968	G	A	PASS	intergenic_region	MODIFIER	LOC111098552-LOC111098449	111098552-111098449	intergenic_region	111098552-111098449		-1	n.26044968G>A
13	26045473	C	T	GATKstd	intergenic_region	MODIFIER	LOC111098552-LOC111098449	111098552-111098449	intergenic_region	111098552-111098449		-1	n.26045473C>T
13	26772328	A	AG	PASS	intergenic_region	MODIFIER	LOC111098450-LOC100682648	111098450-100682648	intergenic_region	111098450-100682648		-1	n.26772328_26772329insG
13	27571927	CTT	C	PASS	intron_variant	MODIFIER	LOC111098554	111098554	transcript	XR_002632479.1	pseudogene	1	n.205+7106_205+7107delTT
13	29014333	ACAGCCACAGTGC	A	PASS	intron_variant	MODIFIER	KCNQ3	475103	transcript	XM_532334.4	protein_coding	1	c.353+47674_353+47685delGCACTGTGGCTG
13	29014333	ACAGCCACAGTGC	A	PASS	non_coding_transcript_exon_variant	MODIFIER	LOC111098556	111098556	transcript	XR_002632482.1	pseudogene	1	n.3151_3162delGCACTGTGGCTG
13	29098681	TTTATTTATTTTG	T	PASS	intergenic_region	MODIFIER	LOC102153300-LRRC6	102153300-475104	intergenic_region	102153300-475104		-1	n.29098682_29098693delTTATTTATTTTG
13	29540496	G	A	PASS	intron_variant	MODIFIER	TG	482047	transcript	NM_001048104.1	protein_coding	41	c.7240-21716G>A
13	29540496	G	A	PASS	intron_variant	MODIFIER	SLA	608259	transcript	XM_022426720.1	protein_coding	1	c.-430-1707C>T
13	29540496	G	A	PASS	intron_variant	MODIFIER	SLA	608259	transcript	XM_005627953.3	protein_coding	1	c.-306-1707C>T
13	29540496	G	A	PASS	intron_variant	MODIFIER	SLA	608259	transcript	XM_845825.5	protein_coding	1	c.-306-1707C>T
13	45753928	A	T	PASS	intron_variant	MODIFIER	SCFD2	482149	transcript	XM_844602.4	protein_coding	5	c.1558+67980T>A
13	45753928	A	T	PASS	intron_variant	MODIFIER	SCFD2	482149	transcript	XR_002632667.1	pseudogene	5	n.1658+67980T>A
13	45753928	A	T	PASS	intron_variant	MODIFIER	SCFD2	482149	transcript	XR_002632668.1	pseudogene	5	n.1658+67980T>A
13	45753928	A	T	PASS	intron_variant	MODIFIER	SCFD2	482149	transcript	XM_022426987.1	protein_coding	5	c.1559-54575T>A
13	45910606	AAAAAAAT	A	PASS	intron_variant	MODIFIER	SCFD2	482149	transcript	XM_844602.4	protein_coding	4	c.1308+4733_1308+4739delATTTTTT
13	45910606	AAAAAAAT	A	PASS	intron_variant	MODIFIER	SCFD2	482149	transcript	XR_002632667.1	pseudogene	4	n.1408+4733_1408+4739delATTTTTT
13	45910606	AAAAAAAT	A	PASS	intron_variant	MODIFIER	SCFD2	482149	transcript	XR_002632668.1	pseudogene	4	n.1408+4733_1408+4739delATTTTTT
13	45910606	AAAAAAAT	A	PASS	intron_variant	MODIFIER	SCFD2	482149	transcript	XM_022426987.1	protein_coding	4	c.1308+4733_1308+4739delATTTTTT
13	50383466	A	G	PASS	intergenic_region	MODIFIER	LOC111098627-LOC111098429	111098627-111098429	intergenic_region	111098627-111098429		-1	n.50383466A>G
13	50578048	C	A	PASS	intergenic_region	MODIFIER	LOC111098627-LOC111098429	111098627-111098429	intergenic_region	111098627-111098429		-1	n.50578048C>A
13	53960321	A	AT	PASS	intergenic_region	MODIFIER	LOC100684189-LOC100684331	100684189-100684331	intergenic_region	100684189-100684331		-1	n.53960321_53960322insT
13	54709602	G	A	PASS	intergenic_region	MODIFIER	LOC100684405-TECRL	100684405-475157	intergenic_region	100684405-475157		-1	n.54709602G>A
13	55382755	GAAAC	G	PASS	intergenic_region	MODIFIER	TECRL-LOC102153987	475157-102153987	intergenic_region	475157-102153987		-1	n.55382756_55382759delAAAC
13	55448862	A	AAAG	PASS	downstream_gene_variant	MODIFIER	LOC102153987	102153987	transcript	XR_293926.3	pseudogene	-1	n.*88_*89insAAG
13	55448862	A	AAAG	PASS	intergenic_region	MODIFIER	LOC102153987-LOC100684472	102153987-100684472	intergenic_region	102153987-100684472		-1	n.55448862_55448863insAAG
13	56758464	A	T	PASS	intergenic_region	MODIFIER	EPHA5-LOC100684630	100684553-100684630	intergenic_region	100684553-100684630		-1	n.56758464A>T
13	57036062	A	AT	PASS	intergenic_region	MODIFIER	EPHA5-LOC100684630	100684553-100684630	intergenic_region	100684553-100684630		-1	n.57036062_57036063insT
13	57234764	A	T	PASS	intergenic_region	MODIFIER	EPHA5-LOC100684630	100684553-100684630	intergenic_region	100684553-100684630		-1	n.57234764A>T
13	57438207	A	AAAT	PASS	intergenic_region	MODIFIER	LOC482170-LOC102154332	482170-102154332	intergenic_region	482170-102154332		-1	n.57438207_57438208insAAT
13	57881667	G	A	PASS	intergenic_region	MODIFIER	LOC102154332-LOC100684773	102154332-100684773	intergenic_region	102154332-100684773		-1	n.57881667G>A
13	59230861	G	A	PASS	intron_variant	MODIFIER	SULT1B1	403636	transcript	NM_001195835.1	protein_coding	6	c.779-1122C>T
13	59538811	G	C	PASS	upstream_gene_variant	MODIFIER	PRR27	611752	transcript	XM_022427055.1	protein_coding	-1	c.-7162G>C
13	59538811	G	C	PASS	upstream_gene_variant	MODIFIER	PRR27	611752	transcript	XM_022427063.1	protein_coding	-1	c.-7162G>C
13	59538811	G	C	PASS	upstream_gene_variant	MODIFIER	PRR27	611752	transcript	XM_022427056.1	protein_coding	-1	c.-7162G>C
13	59538811	G	C	PASS	upstream_gene_variant	MODIFIER	PRR27	611752	transcript	XM_022427057.1	protein_coding	-1	c.-7162G>C
13	59538811	G	C	PASS	upstream_gene_variant	MODIFIER	PRR27	611752	transcript	XM_022427058.1	protein_coding	-1	c.-7162G>C
13	59538811	G	C	PASS	upstream_gene_variant	MODIFIER	PRR27	611752	transcript	XM_022427059.1	protein_coding	-1	c.-7162G>C
13	59538811	G	C	PASS	upstream_gene_variant	MODIFIER	PRR27	611752	transcript	XM_022427060.1	protein_coding	-1	c.-7162G>C
13	59538811	G	C	PASS	upstream_gene_variant	MODIFIER	PRR27	611752	transcript	XM_022427061.1	protein_coding	-1	c.-7162G>C
13	59538811	G	C	PASS	upstream_gene_variant	MODIFIER	PRR27	611752	transcript	XM_014118681.2	protein_coding	-1	c.-7162G>C
13	59538811	G	C	PASS	upstream_gene_variant	MODIFIER	PRR27	611752	transcript	XM_022427066.1	protein_coding	-1	c.-7162G>C
13	59538811	G	C	PASS	upstream_gene_variant	MODIFIER	PRR27	611752	transcript	XM_022427067.1	protein_coding	-1	c.-7162G>C
13	59538811	G	C	PASS	upstream_gene_variant	MODIFIER	PRR27	611752	transcript	XM_022427068.1	protein_coding	-1	c.-8770G>C
13	59538811	G	C	PASS	upstream_gene_variant	MODIFIER	PRR27	611752	transcript	XM_022427069.1	protein_coding	-1	c.-8770G>C
13	59538811	G	C	PASS	upstream_gene_variant	MODIFIER	PRR27	611752	transcript	XM_022427070.1	protein_coding	-1	c.-8770G>C
13	59538811	G	C	PASS	upstream_gene_variant	MODIFIER	PRR27	611752	transcript	XM_014118680.2	protein_coding	-1	c.-7162G>C
13	59538811	G	C	PASS	upstream_gene_variant	MODIFIER	PRR27	611752	transcript	XM_022427064.1	protein_coding	-1	c.-7162G>C
13	59538811	G	C	PASS	upstream_gene_variant	MODIFIER	PRR27	611752	transcript	XM_022427065.1	protein_coding	-1	c.-7162G>C
13	59538811	G	C	PASS	intergenic_region	MODIFIER	STATH-PRR27	608839-611752	intergenic_region	608839-611752		-1	n.59538811G>C
13	59558007	A	G	PASS	downstream_gene_variant	MODIFIER	PRR27	611752	transcript	XM_022427055.1	protein_coding	-1	c.*2817A>G
13	59558007	A	G	PASS	downstream_gene_variant	MODIFIER	PRR27	611752	transcript	XM_022427063.1	protein_coding	-1	c.*5413A>G
13	59558007	A	G	PASS	downstream_gene_variant	MODIFIER	PRR27	611752	transcript	XM_022427056.1	protein_coding	-1	c.*2817A>G
13	59558007	A	G	PASS	downstream_gene_variant	MODIFIER	PRR27	611752	transcript	XM_022427057.1	protein_coding	-1	c.*2817A>G
13	59558007	A	G	PASS	downstream_gene_variant	MODIFIER	PRR27	611752	transcript	XM_022427058.1	protein_coding	-1	c.*2817A>G
13	59558007	A	G	PASS	downstream_gene_variant	MODIFIER	PRR27	611752	transcript	XM_022427059.1	protein_coding	-1	c.*2817A>G
13	59558007	A	G	PASS	downstream_gene_variant	MODIFIER	PRR27	611752	transcript	XM_022427060.1	protein_coding	-1	c.*2817A>G
13	59558007	A	G	PASS	downstream_gene_variant	MODIFIER	PRR27	611752	transcript	XM_022427061.1	protein_coding	-1	c.*2817A>G
13	59558007	A	G	PASS	downstream_gene_variant	MODIFIER	PRR27	611752	transcript	XM_014118681.2	protein_coding	-1	c.*2817A>G
13	59558007	A	G	PASS	downstream_gene_variant	MODIFIER	PRR27	611752	transcript	XM_022427066.1	protein_coding	-1	c.*2817A>G
13	59558007	A	G	PASS	downstream_gene_variant	MODIFIER	PRR27	611752	transcript	XM_022427067.1	protein_coding	-1	c.*2817A>G
13	59558007	A	G	PASS	downstream_gene_variant	MODIFIER	PRR27	611752	transcript	XM_022427068.1	protein_coding	-1	c.*2817A>G
13	59558007	A	G	PASS	downstream_gene_variant	MODIFIER	PRR27	611752	transcript	XM_022427069.1	protein_coding	-1	c.*2817A>G
13	59558007	A	G	PASS	downstream_gene_variant	MODIFIER	PRR27	611752	transcript	XM_022427070.1	protein_coding	-1	c.*2817A>G
13	59558007	A	G	PASS	downstream_gene_variant	MODIFIER	PRR27	611752	transcript	XM_014118680.2	protein_coding	-1	c.*2817A>G
13	59558007	A	G	PASS	downstream_gene_variant	MODIFIER	PRR27	611752	transcript	XM_022427064.1	protein_coding	-1	c.*2817A>G
13	59558007	A	G	PASS	downstream_gene_variant	MODIFIER	PRR27	611752	transcript	XM_022427065.1	protein_coding	-1	c.*2817A>G
13	59558007	A	G	PASS	intergenic_region	MODIFIER	PRR27-ODAM	611752-611755	intergenic_region	611752-611755		-1	n.59558007A>G
13	59690970	T	A	PASS	upstream_gene_variant	MODIFIER	CABS1	102151383	transcript	XM_005628272.2	protein_coding	-1	c.-679T>A
13	59690970	T	A	PASS	upstream_gene_variant	MODIFIER	CABS1	102151383	transcript	XM_532397.6	protein_coding	-1	c.-679T>A
13	59690970	T	A	PASS	intergenic_region	MODIFIER	CSN3-CABS1	100685434-102151383	intergenic_region	100685434-102151383		-1	n.59690970T>A
13	59690974	T	G	PASS	upstream_gene_variant	MODIFIER	CABS1	102151383	transcript	XM_005628272.2	protein_coding	-1	c.-675T>G
13	59690974	T	G	PASS	upstream_gene_variant	MODIFIER	CABS1	102151383	transcript	XM_532397.6	protein_coding	-1	c.-675T>G
13	59690974	T	G	PASS	intergenic_region	MODIFIER	CSN3-CABS1	100685434-102151383	intergenic_region	100685434-102151383		-1	n.59690974T>G
13	59977577	A	C	PASS	intergenic_region	MODIFIER	JCHAIN-UTP3	475166-475167	intergenic_region	475166-475167		-1	n.59977577A>C
13	60005900	A	AAG	PASS	upstream_gene_variant	MODIFIER	RUFY3	475168	transcript	XM_022427080.1	protein_coding	-1	c.-1156_-1155insAG
13	60005900	A	AAG	PASS	upstream_gene_variant	MODIFIER	RUFY3	475168	transcript	XM_003431831.4	protein_coding	-1	c.-1156_-1155insAG
13	60005900	A	AAG	PASS	upstream_gene_variant	MODIFIER	RUFY3	475168	transcript	XR_002632707.1	pseudogene	-1	n.-1141_-1140insAG
13	60005900	A	AAG	PASS	upstream_gene_variant	MODIFIER	RUFY3	475168	transcript	XM_022427083.1	protein_coding	-1	c.-1156_-1155insAG
13	60005900	A	AAG	PASS	upstream_gene_variant	MODIFIER	RUFY3	475168	transcript	XM_022427081.1	protein_coding	-1	c.-1156_-1155insAG
13	60005900	A	AAG	PASS	upstream_gene_variant	MODIFIER	RUFY3	475168	transcript	XM_022427082.1	protein_coding	-1	c.-1156_-1155insAG
13	60005900	A	AAG	PASS	intergenic_region	MODIFIER	UTP3-RUFY3	475167-475168	intergenic_region	475167-475168		-1	n.60005900_60005901insAG
14	10757722	GT	G	PASS	intergenic_region	MODIFIER	LOC100683176-LOC609108	100683176-609108	intergenic_region	100683176-609108		-1	n.10757723delT
14	17907885	G	A	PASS	intron_variant	MODIFIER	ANKIB1	475226	transcript	XM_005628502.3	protein_coding	1	c.-91-9976G>A
14	17907885	G	A	PASS	intron_variant	MODIFIER	ANKIB1	475226	transcript	XM_022427329.1	protein_coding	3	c.-91-9976G>A
14	17907885	G	A	PASS	intron_variant	MODIFIER	ANKIB1	475226	transcript	XM_022427330.1	protein_coding	2	c.-91-9976G>A
14	17907885	G	A	PASS	intron_variant	MODIFIER	ANKIB1	475226	transcript	XM_022427331.1	protein_coding	1	c.-91-9976G>A
14	17907885	G	A	PASS	intron_variant	MODIFIER	ANKIB1	475226	transcript	XM_022427332.1	protein_coding	1	c.-91-9976G>A
14	17907885	G	A	PASS	intron_variant	MODIFIER	ANKIB1	475226	transcript	XM_022427334.1	protein_coding	1	c.-91-9976G>A
14	17907885	G	A	PASS	intron_variant	MODIFIER	ANKIB1	475226	transcript	XM_005628504.3	protein_coding	2	c.-91-9976G>A
14	18068272	C	T	PASS	intergenic_region	MODIFIER	LOC106559718-PEX1	106559718-475227	intergenic_region	106559718-475227		-1	n.18068272C>T
14	19226955	T	A	PASS	intron_variant	MODIFIER	GNGT1	403895	transcript	XM_022427126.1	protein_coding	2	c.-402-69797T>A
14	19226955	T	A	PASS	intron_variant	MODIFIER	GNGT1	403895	transcript	XM_022427127.1	protein_coding	2	c.-298-89055T>A
14	19226955	T	A	PASS	intron_variant	MODIFIER	GNGT1	403895	transcript	XM_022427128.1	protein_coding	2	c.-402-69797T>A
14	20022335	G	A	PASS	intron_variant	MODIFIER	CASD1	475232	transcript	XM_022427156.1	protein_coding	17	c.2104-1334G>A
14	23975455	G	T	PASS	intron_variant	MODIFIER	NXPH1	610361	transcript	XM_014119202.2	protein_coding	4	c.54+17579G>T
14	23975455	G	T	PASS	intron_variant	MODIFIER	NXPH1	610361	transcript	XM_847844.5	protein_coding	2	c.54+17579G>T
14	24278587	A	T	PASS	intergenic_region	MODIFIER	NXPH1-LOC610367	610361-610367	intergenic_region	610361-610367		-1	n.24278587A>T
14	24622370	A	T	PASS	upstream_gene_variant	MODIFIER	LOC610367	610367	transcript	610367	pseudogene	-1	n.-4770A>T
14	24622370	A	T	PASS	intergenic_region	MODIFIER	NXPH1-LOC610367	610361-610367	intergenic_region	610361-610367		-1	n.24622370A>T
14	24756148	G	T	PASS	intergenic_region	MODIFIER	LOC610367-LOC111098672	610367-111098672	intergenic_region	610367-111098672		-1	n.24756148G>T
14	24785880	A	G	PASS	intergenic_region	MODIFIER	LOC610367-LOC111098672	610367-111098672	intergenic_region	610367-111098672		-1	n.24785880A>G
14	24793053	AC	A	PASS	intergenic_region	MODIFIER	LOC610367-LOC111098672	610367-111098672	intergenic_region	610367-111098672		-1	n.24793054delC
14	24804977	T	C	PASS	intergenic_region	MODIFIER	LOC610367-LOC111098672	610367-111098672	intergenic_region	610367-111098672		-1	n.24804977T>C
14	25070236	A	G	PASS	intergenic_region	MODIFIER	LOC610367-LOC111098672	610367-111098672	intergenic_region	610367-111098672		-1	n.25070236A>G
14	25115957	TAGAG	T	PASS	intergenic_region	MODIFIER	LOC610367-LOC111098672	610367-111098672	intergenic_region	610367-111098672		-1	n.25115958_25115961delAGAG
14	25692038	TGAAACATCAATATCGGGATCCCTGGGTGGCGCAGCGGTTTGGCGCCTGCCTTTGGCCCAGGGCGCGATTCTGGAGACCCAGGATCGAATCCCACATCGGGCTCCCAGTGCATGGAGCCTGCTTCTCCCTCTGCCTGTGTCTCTGCCTCTCTCTCTCTCTCTCTCTCTCTCTGTGACTATCATAAATAAATAAAAATTTAAAAAAAAAAAAAAAAAA	T	PASS	intergenic_region	MODIFIER	LOC111098672-LOC106559672	111098672-106559672	intergenic_region	111098672-106559672		-1	n.25692039_25692254del
14	26103615	A	C	PASS	intron_variant	MODIFIER	LOC111098772	111098772	transcript	XR_002632946.1	pseudogene	4	n.796-2611T>G
14	26103615	A	C	PASS	intron_variant	MODIFIER	LOC111098772	111098772	transcript	XR_002632945.1	pseudogene	3	n.417-2611T>G
14	26103615	A	C	PASS	intron_variant	MODIFIER	LOC111098772	111098772	transcript	XR_002632948.1	pseudogene	2	n.360-2611T>G
14	26103615	A	C	PASS	intron_variant	MODIFIER	LOC111098772	111098772	transcript	XR_002632944.1	pseudogene	4	n.563-2611T>G
14	26103615	A	C	PASS	intron_variant	MODIFIER	LOC111098772	111098772	transcript	XR_002632947.1	pseudogene	3	n.504-2611T>G
14	26709790	T	C	PASS	intron_variant	MODIFIER	THSD7A	100686606	transcript	XM_005628560.3	protein_coding	1	c.184+59484A>G
14	26709790	T	C	PASS	intron_variant	MODIFIER	THSD7A	100686606	transcript	XM_003431865.5	protein_coding	1	c.184+59484A>G
14	26709790	T	C	PASS	intron_variant	MODIFIER	THSD7A	100686606	transcript	XM_022427411.1	protein_coding	1	c.184+59484A>G
14	26709790	T	C	PASS	intron_variant	MODIFIER	THSD7A	100686606	transcript	XM_022427412.1	protein_coding	1	c.184+59484A>G
14	26709790	T	C	PASS	intron_variant	MODIFIER	THSD7A	100686606	transcript	XM_022427413.1	protein_coding	1	c.184+59484A>G
14	26709790	T	C	PASS	intron_variant	MODIFIER	THSD7A	100686606	transcript	XM_005628561.3	protein_coding	1	c.184+59484A>G
14	26709791	C	A	PASS	intron_variant	MODIFIER	THSD7A	100686606	transcript	XM_005628560.3	protein_coding	1	c.184+59483G>T
14	26709791	C	A	PASS	intron_variant	MODIFIER	THSD7A	100686606	transcript	XM_003431865.5	protein_coding	1	c.184+59483G>T
14	26709791	C	A	PASS	intron_variant	MODIFIER	THSD7A	100686606	transcript	XM_022427411.1	protein_coding	1	c.184+59483G>T
14	26709791	C	A	PASS	intron_variant	MODIFIER	THSD7A	100686606	transcript	XM_022427412.1	protein_coding	1	c.184+59483G>T
14	26709791	C	A	PASS	intron_variant	MODIFIER	THSD7A	100686606	transcript	XM_022427413.1	protein_coding	1	c.184+59483G>T
14	26709791	C	A	PASS	intron_variant	MODIFIER	THSD7A	100686606	transcript	XM_005628561.3	protein_coding	1	c.184+59483G>T
14	26951646	G	A	PASS	intergenic_region	MODIFIER	LOC106559673-LOC100686927	106559673-100686927	intergenic_region	106559673-100686927		-1	n.26951646G>A
14	26988891	T	G	PASS	intergenic_region	MODIFIER	LOC106559673-LOC100686927	106559673-100686927	intergenic_region	106559673-100686927		-1	n.26988891T>G
14	26988975	G	A	PASS	intergenic_region	MODIFIER	LOC106559673-LOC100686927	106559673-100686927	intergenic_region	106559673-100686927		-1	n.26988975G>A
14	27303290	T	A	PASS	intergenic_region	MODIFIER	VWDE-CAFA-T2R2	482323-100271741	intergenic_region	482323-100271741		-1	n.27303290T>A
14	27303307	A	AT	PASS	intergenic_region	MODIFIER	VWDE-CAFA-T2R2	482323-100271741	intergenic_region	482323-100271741		-1	n.27303307_27303308insT
14	40926487	T	TTCC	PASS	intron_variant	MODIFIER	TAX1BP1	475264	transcript	XM_005628662.3	protein_coding	16	c.2166+4641_2166+4642insTCC
14	40926487	T	TTCC	PASS	intron_variant	MODIFIER	TAX1BP1	475264	transcript	XM_022427514.1	protein_coding	16	c.2136+4641_2136+4642insTCC
14	40926487	T	TTCC	PASS	intron_variant	MODIFIER	TAX1BP1	475264	transcript	XM_022427515.1	protein_coding	16	c.2040+4641_2040+4642insTCC
14	40926487	T	TTCC	PASS	intron_variant	MODIFIER	TAX1BP1	475264	transcript	XM_022427516.1	protein_coding	14	c.1941+4641_1941+4642insTCC
14	40926487	T	TTCC	PASS	intron_variant	MODIFIER	TAX1BP1	475264	transcript	XM_859678.5	protein_coding	16	c.2028+4641_2028+4642insTCC
14	40926487	T	TTCC	PASS	intron_variant	MODIFIER	TAX1BP1	475264	transcript	XM_022427513.1	protein_coding	16	c.2166+4641_2166+4642insTCC
14	42851896	C	CT	PASS	intron_variant	MODIFIER	PLEKHA8	482381	transcript	XM_022427142.1	protein_coding	12	c.1400-3037_1400-3036insT
14	42851896	C	CT	PASS	intron_variant	MODIFIER	PLEKHA8	482381	transcript	NM_001167698.1	protein_coding	12	c.1301-3037_1301-3036insT
14	42851896	C	CT	PASS	intron_variant	MODIFIER	PLEKHA8	482381	transcript	XM_022427144.1	protein_coding	12	c.1166-3037_1166-3036insT
14	42851896	C	CT	PASS	intron_variant	MODIFIER	PLEKHA8	482381	transcript	XM_022427145.1	protein_coding	12	c.1166-3037_1166-3036insT
14	42851896	C	CT	PASS	intron_variant	MODIFIER	PLEKHA8	482381	transcript	XM_022427143.1	protein_coding	12	c.1268-3037_1268-3036insT
14	57149894	G	T	PASS	intergenic_region	MODIFIER	LOC100855948-LOC111098713	100855948-111098713	intergenic_region	100855948-111098713		-1	n.57149894G>T
15	4117398	ACCACCG	A	PASS	intergenic_region	MODIFIER	LOC111098951-LOC102151429	111098951-102151429	intergenic_region	111098951-102151429		-1	n.4117399_4117404delCCACCG
15	7891371	C	G	PASS	intron_variant	MODIFIER	CSMD2	609494	transcript	XM_022403576.1	protein_coding	5	c.836+18943C>G
15	9667771	C	CT	PASS	upstream_gene_variant	MODIFIER	OSBPL9	475355	transcript	XM_005629007.3	protein_coding	-1	c.-1549_-1548insA
15	9667771	C	CT	PASS	upstream_gene_variant	MODIFIER	OSBPL9	475355	transcript	XM_854496.5	protein_coding	-1	c.-1549_-1548insA
15	9667771	C	CT	PASS	upstream_gene_variant	MODIFIER	OSBPL9	475355	transcript	XM_014119375.2	protein_coding	-1	c.-1549_-1548insA
15	9667771	C	CT	PASS	upstream_gene_variant	MODIFIER	OSBPL9	475355	transcript	XM_003431990.4	protein_coding	-1	c.-1549_-1548insA
15	9667771	C	CT	PASS	upstream_gene_variant	MODIFIER	OSBPL9	475355	transcript	XM_844634.5	protein_coding	-1	c.-1549_-1548insA
15	9667771	C	CT	PASS	upstream_gene_variant	MODIFIER	OSBPL9	475355	transcript	XM_854358.5	protein_coding	-1	c.-1549_-1548insA
15	9667771	C	CT	PASS	upstream_gene_variant	MODIFIER	OSBPL9	475355	transcript	XR_294143.3	pseudogene	-1	n.-1522_-1521insA
15	9667771	C	CT	PASS	intergenic_region	MODIFIER	OSBPL9-LOC111098969	475355-111098969	intergenic_region	475355-111098969		-1	n.9667771_9667772insT
15	12412692	G	C	PASS	intron_variant	MODIFIER	AGBL4	610123	transcript	XM_022427936.1	protein_coding	13	c.1838-7520G>C
15	12412692	G	C	PASS	intron_variant	MODIFIER	AGBL4	610123	transcript	XM_022427939.1	protein_coding	13	c.1787-7520G>C
15	12412692	G	C	PASS	intron_variant	MODIFIER	AGBL4	610123	transcript	XM_022427947.1	protein_coding	11	c.1319-7520G>C
15	12412692	G	C	PASS	intron_variant	MODIFIER	AGBL4	610123	transcript	XM_847536.4	protein_coding	11	c.1268-7520G>C
15	12412692	G	C	PASS	intron_variant	MODIFIER	AGBL4	610123	transcript	XR_002633401.1	pseudogene	13	n.1906-7520G>C
15	12412692	G	C	PASS	intron_variant	MODIFIER	AGBL4	610123	transcript	XM_022427938.1	protein_coding	13	c.1838-7520G>C
15	12412692	G	C	PASS	intron_variant	MODIFIER	AGBL4	610123	transcript	XM_022427940.1	protein_coding	13	c.1787-7520G>C
15	12412692	G	C	PASS	intron_variant	MODIFIER	AGBL4	610123	transcript	XM_022427941.1	protein_coding	11	c.1661-7520G>C
15	12412692	G	C	PASS	intron_variant	MODIFIER	AGBL4	610123	transcript	XM_022427943.1	protein_coding	11	c.1562-7520G>C
15	12412692	G	C	PASS	intron_variant	MODIFIER	AGBL4	610123	transcript	XM_022427942.1	protein_coding	11	c.1649-7520G>C
15	12412692	G	C	PASS	intron_variant	MODIFIER	AGBL4	610123	transcript	XM_022427945.1	protein_coding	11	c.1484-7520G>C
15	12412692	G	C	PASS	intron_variant	MODIFIER	AGBL4	610123	transcript	XM_022427950.1	protein_coding	8	c.1238-7520G>C
15	12412692	G	C	PASS	intron_variant	MODIFIER	AGBL4	610123	transcript	XM_022427951.1	protein_coding	9	c.1238-7520G>C
15	12412692	G	C	PASS	intron_variant	MODIFIER	AGBL4	610123	transcript	XM_022427952.1	protein_coding	8	c.1175-7520G>C
15	12412692	G	C	PASS	intron_variant	MODIFIER	AGBL4	610123	transcript	XM_022427949.1	protein_coding	8	c.1253-7520G>C
15	14051049	A	C	GATKstd	downstream_gene_variant	MODIFIER	NSUN4	610446	transcript	XM_005629034.2	protein_coding	-1	c.*4955T>G
15	14051049	A	C	GATKstd	intergenic_region	MODIFIER	LOC482510-NSUN4	482510-610446	intergenic_region	482510-610446		-1	n.14051049A>C
15	14105128	C	A	GATKstd	missense_variant	MODERATE	LRRC41	608535	transcript	XM_845204.5	protein_coding	4	c.896C>A	p.Ala299Glu
15	14105128	C	A	GATKstd	missense_variant	MODERATE	LRRC41	608535	transcript	XM_022427982.1	protein_coding	4	c.896C>A	p.Ala299Glu
15	14105128	C	A	GATKstd	missense_variant	MODERATE	LRRC41	608535	transcript	XM_014119565.2	protein_coding	4	c.566C>A	p.Ala189Glu
15	14105128	C	A	GATKstd	missense_variant	MODERATE	LRRC41	608535	transcript	XM_014119564.2	protein_coding	4	c.758C>A	p.Ala253Glu
15	14105128	C	A	GATKstd	downstream_gene_variant	MODIFIER	LOC106559767	106559767	transcript	XR_001317792.2	pseudogene	-1	n.*2663G>T
15	14235353	C	A	GATKstd	5_prime_UTR_variant	MODIFIER	PIK3R3	100856339	transcript	XM_014119571.2	protein_coding	1	c.-475C>A
15	14235353	C	A	GATKstd	intron_variant	MODIFIER	PIK3R3	100856339	transcript	XM_022427996.1	protein_coding	2	c.-27+11290C>A
15	14235353	C	A	GATKstd	intron_variant	MODIFIER	PIK3R3	100856339	transcript	XM_005629040.2	protein_coding	1	c.-27+1617C>A
15	14282907	G	C	GATKstd	intron_variant	MODIFIER	PIK3R3	100856339	transcript	XM_014119571.2	protein_coding	1	c.107-26853G>C
15	14282907	G	C	GATKstd	intron_variant	MODIFIER	PIK3R3	100856339	transcript	XM_022427996.1	protein_coding	2	c.-26-26853G>C
15	14282907	G	C	GATKstd	intron_variant	MODIFIER	PIK3R3	100856339	transcript	XM_005629040.2	protein_coding	1	c.-26-26853G>C
15	14393679	G	A	GATKstd	intron_variant	MODIFIER	MAST2	482513	transcript	XM_022427985.1	protein_coding	10	c.1130+625C>T
15	14393679	G	A	GATKstd	intron_variant	MODIFIER	MAST2	482513	transcript	XM_005629047.3	protein_coding	6	c.473+625C>T
15	14393679	G	A	GATKstd	intron_variant	MODIFIER	MAST2	482513	transcript	XM_005629046.3	protein_coding	7	c.668+625C>T
15	14393679	G	A	GATKstd	intron_variant	MODIFIER	MAST2	482513	transcript	XM_022427993.1	protein_coding	8	c.578+625C>T
15	14393679	G	A	GATKstd	intron_variant	MODIFIER	MAST2	482513	transcript	XM_014119591.2	protein_coding	7	c.494+625C>T
15	14393679	G	A	GATKstd	intron_variant	MODIFIER	MAST2	482513	transcript	XM_022427992.1	protein_coding	8	c.689+625C>T
15	14393679	G	A	GATKstd	intron_variant	MODIFIER	MAST2	482513	transcript	XM_022427991.1	protein_coding	9	c.695+625C>T
15	14393679	G	A	GATKstd	intron_variant	MODIFIER	MAST2	482513	transcript	XM_022427994.1	protein_coding	8	c.500+625C>T
15	14393679	G	A	GATKstd	intron_variant	MODIFIER	MAST2	482513	transcript	XM_005629044.3	protein_coding	9	c.935+625C>T
15	14393679	G	A	GATKstd	intron_variant	MODIFIER	MAST2	482513	transcript	XM_005629045.3	protein_coding	8	c.914+625C>T
15	14393679	G	A	GATKstd	intron_variant	MODIFIER	MAST2	482513	transcript	XM_022427986.1	protein_coding	10	c.1130+625C>T
15	14393679	G	A	GATKstd	intron_variant	MODIFIER	MAST2	482513	transcript	XM_022427987.1	protein_coding	9	c.1109+625C>T
15	14393679	G	A	GATKstd	intron_variant	MODIFIER	MAST2	482513	transcript	XM_022427988.1	protein_coding	11	c.1073+625C>T
15	14393679	G	A	GATKstd	intron_variant	MODIFIER	MAST2	482513	transcript	XM_022427990.1	protein_coding	9	c.827+625C>T
15	14393679	G	A	GATKstd	intron_variant	MODIFIER	MAST2	482513	transcript	XM_539630.6	protein_coding	8	c.914+625C>T
15	14431162	C	T	GATKstd	intron_variant	MODIFIER	MAST2	482513	transcript	XM_022427985.1	protein_coding	5	c.708-8208G>A
15	14431162	C	T	GATKstd	intron_variant	MODIFIER	MAST2	482513	transcript	XM_005629047.3	protein_coding	1	c.51-8208G>A
15	14431162	C	T	GATKstd	intron_variant	MODIFIER	MAST2	482513	transcript	XM_005629046.3	protein_coding	2	c.246-8208G>A
15	14431162	C	T	GATKstd	intron_variant	MODIFIER	MAST2	482513	transcript	XM_022427993.1	protein_coding	3	c.156-8208G>A
15	14431162	C	T	GATKstd	intron_variant	MODIFIER	MAST2	482513	transcript	XM_014119591.2	protein_coding	2	c.72-8208G>A
15	14431162	C	T	GATKstd	intron_variant	MODIFIER	MAST2	482513	transcript	XM_022427992.1	protein_coding	3	c.267-8208G>A
15	14431162	C	T	GATKstd	intron_variant	MODIFIER	MAST2	482513	transcript	XM_022427991.1	protein_coding	4	c.273-8208G>A
15	14431162	C	T	GATKstd	intron_variant	MODIFIER	MAST2	482513	transcript	XM_022427994.1	protein_coding	3	c.78-8208G>A
15	14431162	C	T	GATKstd	intron_variant	MODIFIER	MAST2	482513	transcript	XM_005629044.3	protein_coding	4	c.513-8208G>A
15	14431162	C	T	GATKstd	intron_variant	MODIFIER	MAST2	482513	transcript	XM_005629045.3	protein_coding	4	c.513-8208G>A
15	14431162	C	T	GATKstd	intron_variant	MODIFIER	MAST2	482513	transcript	XM_022427986.1	protein_coding	5	c.708-8208G>A
15	14431162	C	T	GATKstd	intron_variant	MODIFIER	MAST2	482513	transcript	XM_022427987.1	protein_coding	5	c.708-8208G>A
15	14431162	C	T	GATKstd	intron_variant	MODIFIER	MAST2	482513	transcript	XM_022427988.1	protein_coding	6	c.651-8208G>A
15	14431162	C	T	GATKstd	intron_variant	MODIFIER	MAST2	482513	transcript	XM_022427990.1	protein_coding	4	c.405-8208G>A
15	14431162	C	T	GATKstd	intron_variant	MODIFIER	MAST2	482513	transcript	XM_539630.6	protein_coding	4	c.513-8208G>A
15	14539001	CTT	C	PASS	intron_variant	MODIFIER	MAST2	482513	transcript	XM_022427985.1	protein_coding	1	c.190-363_190-362delAA
15	14539001	CTT	C	PASS	intron_variant	MODIFIER	MAST2	482513	transcript	XM_022427991.1	protein_coding	1	c.-103-363_-103-362delAA
15	14539001	CTT	C	PASS	intron_variant	MODIFIER	MAST2	482513	transcript	XM_022427994.1	protein_coding	1	c.-103-363_-103-362delAA
15	14539001	CTT	C	PASS	intron_variant	MODIFIER	MAST2	482513	transcript	XM_005629044.3	protein_coding	1	c.190-363_190-362delAA
15	14539001	CTT	C	PASS	intron_variant	MODIFIER	MAST2	482513	transcript	XM_005629045.3	protein_coding	1	c.190-363_190-362delAA
15	14539001	CTT	C	PASS	intron_variant	MODIFIER	MAST2	482513	transcript	XM_022427986.1	protein_coding	1	c.190-363_190-362delAA
15	14539001	CTT	C	PASS	intron_variant	MODIFIER	MAST2	482513	transcript	XM_022427987.1	protein_coding	1	c.190-363_190-362delAA
15	14539001	CTT	C	PASS	intron_variant	MODIFIER	MAST2	482513	transcript	XM_022427988.1	protein_coding	1	c.190-363_190-362delAA
15	14539001	CTT	C	PASS	intron_variant	MODIFIER	MAST2	482513	transcript	XM_022427990.1	protein_coding	1	c.190-363_190-362delAA
15	14539001	CTT	C	PASS	intron_variant	MODIFIER	MAST2	482513	transcript	XM_539630.6	protein_coding	1	c.190-363_190-362delAA
15	14539571	ACGAGGG	A	PASS	intron_variant	MODIFIER	MAST2	482513	transcript	XM_022427985.1	protein_coding	1	c.190-937_190-932delCCCTCG
15	14539571	ACGAGGG	A	PASS	intron_variant	MODIFIER	MAST2	482513	transcript	XM_022427991.1	protein_coding	1	c.-103-937_-103-932delCCCTCG
15	14539571	ACGAGGG	A	PASS	intron_variant	MODIFIER	MAST2	482513	transcript	XM_022427994.1	protein_coding	1	c.-103-937_-103-932delCCCTCG
15	14539571	ACGAGGG	A	PASS	intron_variant	MODIFIER	MAST2	482513	transcript	XM_005629044.3	protein_coding	1	c.190-937_190-932delCCCTCG
15	14539571	ACGAGGG	A	PASS	intron_variant	MODIFIER	MAST2	482513	transcript	XM_005629045.3	protein_coding	1	c.190-937_190-932delCCCTCG
15	14539571	ACGAGGG	A	PASS	intron_variant	MODIFIER	MAST2	482513	transcript	XM_022427986.1	protein_coding	1	c.190-937_190-932delCCCTCG
15	14539571	ACGAGGG	A	PASS	intron_variant	MODIFIER	MAST2	482513	transcript	XM_022427987.1	protein_coding	1	c.190-937_190-932delCCCTCG
15	14539571	ACGAGGG	A	PASS	intron_variant	MODIFIER	MAST2	482513	transcript	XM_022427988.1	protein_coding	1	c.190-937_190-932delCCCTCG
15	14539571	ACGAGGG	A	PASS	intron_variant	MODIFIER	MAST2	482513	transcript	XM_022427990.1	protein_coding	1	c.190-937_190-932delCCCTCG
15	14539571	ACGAGGG	A	PASS	intron_variant	MODIFIER	MAST2	482513	transcript	XM_539630.6	protein_coding	1	c.190-937_190-932delCCCTCG
15	14699534	G	A	GATKstd	intron_variant	MODIFIER	GPBP1L1	475372	transcript	XM_005629053.3	protein_coding	1	c.-1085-1769G>A
15	14699534	G	A	GATKstd	intron_variant	MODIFIER	GPBP1L1	475372	transcript	XM_022427998.1	protein_coding	1	c.-1085-1769G>A
15	14699534	G	A	GATKstd	intron_variant	MODIFIER	GPBP1L1	475372	transcript	XM_005629054.3	protein_coding	1	c.-1085-1769G>A
15	14699534	G	A	GATKstd	intron_variant	MODIFIER	GPBP1L1	475372	transcript	XM_532596.6	protein_coding	1	c.-1085-1769G>A
15	14893592	C	T	PASS	intron_variant	MODIFIER	TESK2	608657	transcript	XM_014119538.2	protein_coding	1	c.-91-12951C>T
15	14893592	C	T	PASS	intron_variant	MODIFIER	TESK2	608657	transcript	XM_845459.5	protein_coding	1	c.-91-12951C>T
15	14943421	AT	A	PASS	intron_variant	MODIFIER	TESK2	608657	transcript	XM_005629075.3	protein_coding	2	c.223-2404delT
15	14943421	AT	A	PASS	intron_variant	MODIFIER	TESK2	608657	transcript	XM_014119538.2	protein_coding	2	c.223-2404delT
15	14943421	AT	A	PASS	intron_variant	MODIFIER	TESK2	608657	transcript	XM_845459.5	protein_coding	2	c.223-2404delT
15	14991835	A	AAAAG	PASS	intron_variant	MODIFIER	TESK2	608657	transcript	XM_005629075.3	protein_coding	4	c.394-9481_394-9480insAAAG
15	14991835	A	AAAAG	PASS	intron_variant	MODIFIER	TESK2	608657	transcript	XM_014119538.2	protein_coding	4	c.393+16217_393+16218insAAAG
15	14991835	A	AAAAG	PASS	intron_variant	MODIFIER	TESK2	608657	transcript	XM_845459.5	protein_coding	4	c.394-9481_394-9480insAAAG
15	14991840	G	GAAAGGAA	PASS	intron_variant	MODIFIER	TESK2	608657	transcript	XM_005629075.3	protein_coding	4	c.394-9476_394-9475insAAAGGAA
15	14991840	G	GAAAGGAA	PASS	intron_variant	MODIFIER	TESK2	608657	transcript	XM_014119538.2	protein_coding	4	c.393+16222_393+16223insAAAGGAA
15	14991840	G	GAAAGGAA	PASS	intron_variant	MODIFIER	TESK2	608657	transcript	XM_845459.5	protein_coding	4	c.394-9476_394-9475insAAAGGAA
15	15037887	C	T	GATKstd	intergenic_region	MODIFIER	HPDL-LOC111098982	100856610-111098982	intergenic_region	100856610-111098982		-1	n.15037887C>T
15	15191736	G	A	GATKstd	intron_variant	MODIFIER	ZSWIM5	610608	transcript	XM_848143.5	protein_coding	2	c.470-51207G>A
15	15193033	G	GAGTAAATTCGC	PASS	intron_variant	MODIFIER	ZSWIM5	610608	transcript	XM_848143.5	protein_coding	2	c.470-49910_470-49909insAGTAAATTCGC
15	15209250	A	T	GATKstd	intron_variant	MODIFIER	ZSWIM5	610608	transcript	XM_848143.5	protein_coding	2	c.470-33693A>T
15	15250241	ACT	A	PASS	intron_variant	MODIFIER	ZSWIM5	610608	transcript	XM_848143.5	protein_coding	4	c.975+350_975+351delCT
15	15342651	G	C	PASS	intron_variant	MODIFIER	EIF2B3	475379	transcript	XM_532603.6	protein_coding	2	c.148+1404G>C
15	15396672	GCGAT	G	PASS	intron_variant	MODIFIER	EIF2B3	475379	transcript	XM_532603.6	protein_coding	5	c.566+6136_566+6139delCGAT
15	15505706	C	T	GATKstd	downstream_gene_variant	MODIFIER	PTCH2	482519	transcript	XM_005629080.3	protein_coding	-1	c.*2472C>T
15	15505706	C	T	GATKstd	downstream_gene_variant	MODIFIER	PTCH2	482519	transcript	XM_022428023.1	protein_coding	-1	c.*2472C>T
15	15505706	C	T	GATKstd	downstream_gene_variant	MODIFIER	PTCH2	482519	transcript	XM_005629082.3	protein_coding	-1	c.*4602C>T
15	15505706	C	T	GATKstd	downstream_gene_variant	MODIFIER	PTCH2	482519	transcript	XM_005629081.3	protein_coding	-1	c.*2800C>T
15	15505706	C	T	GATKstd	downstream_gene_variant	MODIFIER	PTCH2	482519	transcript	XM_014119704.2	protein_coding	-1	c.*2472C>T
15	15505706	C	T	GATKstd	downstream_gene_variant	MODIFIER	PTCH2	482519	transcript	XM_539636.7	protein_coding	-1	c.*2472C>T
15	15505706	C	T	GATKstd	downstream_gene_variant	MODIFIER	PTCH2	482519	transcript	XM_022428025.1	protein_coding	-1	c.*2472C>T
15	15505706	C	T	GATKstd	intergenic_region	MODIFIER	PTCH2-BTBD19	482519-610643	intergenic_region	482519-610643		-1	n.15505706C>T
15	25400183	T	TG	PASS	intergenic_region	MODIFIER	LOC111098890-LOC111098891	111098890-111098891	intergenic_region	111098890-111098891		-1	n.25400183_25400184insG
15	36602435	T	C	PASS	intergenic_region	MODIFIER	NEDD1-LOC111098903	100855622-111098903	intergenic_region	100855622-111098903		-1	n.36602435T>C
15	42797447	CG	C	PASS	intergenic_region	MODIFIER	SMARCA5-LOC111090075	475451-111090075	intergenic_region	475451-111090075		-1	n.42797448delG
15	59372840	A	AT	PASS	intergenic_region	MODIFIER	LOC111098925-NAF1	111098925-475486	intergenic_region	111098925-475486		-1	n.59372840_59372841insT
15	59649647	C	T	GATKstd	intergenic_region	MODIFIER	NPY5R-LOC106559737	403712-106559737	intergenic_region	403712-106559737		-1	n.59649647C>T
15	62010233	C	A	PASS	intergenic_region	MODIFIER	LOC111098878-LOC102152603	111098878-102152603	intergenic_region	111098878-102152603		-1	n.62010233C>A
16	5358017	CT	C	PASS	intron_variant	MODIFIER	TPK1	475515	transcript	XM_022403666.1	protein_coding	2	c.119-18257delT
16	5358017	CT	C	PASS	intron_variant	MODIFIER	TPK1	475515	transcript	XM_022403669.1	protein_coding	3	c.152+38196delT
16	5358017	CT	C	PASS	intron_variant	MODIFIER	TPK1	475515	transcript	XM_022403667.1	protein_coding	2	c.116-18257delT
16	5358017	CT	C	PASS	intron_variant	MODIFIER	TPK1	475515	transcript	XM_532737.6	protein_coding	2	c.116-18257delT
16	5358017	CT	C	PASS	intron_variant	MODIFIER	TPK1	475515	transcript	XM_022403671.1	protein_coding	2	c.119-18257delT
16	5358017	CT	C	PASS	intron_variant	MODIFIER	TPK1	475515	transcript	XM_022403670.1	protein_coding	2	c.119-18257delT
16	5358017	CT	C	PASS	intron_variant	MODIFIER	TPK1	475515	transcript	XM_022403668.1	protein_coding	2	c.119-18257delT
16	13468480	C	G	PASS	upstream_gene_variant	MODIFIER	LOC102152103	102152103	transcript	XM_005629605.3	protein_coding	-1	c.-5188C>G
16	13468480	C	G	PASS	upstream_gene_variant	MODIFIER	LOC102152103	102152103	transcript	XR_294332.3	pseudogene	-1	n.-4798C>G
16	13468480	C	G	PASS	upstream_gene_variant	MODIFIER	LOC102152103	102152103	transcript	XR_294334.3	pseudogene	-1	n.-4798C>G
16	13468480	C	G	PASS	intergenic_region	MODIFIER	BPGM-LOC102152103	482704-102152103	intergenic_region	482704-102152103		-1	n.13468480C>G
16	13720948	A	AAT	PASS	intron_variant	MODIFIER	SH3BP5L	482700	transcript	XM_022403798.1	protein_coding	2	c.183+1535_183+1536insAT
16	13720948	A	AAT	PASS	intron_variant	MODIFIER	SH3BP5L	482700	transcript	XM_854895.5	protein_coding	2	c.183+1535_183+1536insAT
16	14153208	A	C	PASS	intron_variant	MODIFIER	ZNF786	106557477	transcript	XM_005629624.3	protein_coding	2	c.173-3341T>G
16	14153208	A	C	PASS	intron_variant	MODIFIER	ZNF786	106557477	transcript	XM_022403812.1	protein_coding	1	c.5-3341T>G
16	14153208	A	C	PASS	intron_variant	MODIFIER	ZNF786	106557477	transcript	XM_005629625.3	protein_coding	2	c.131-3341T>G
16	14153208	A	C	PASS	intron_variant	MODIFIER	ZNF786	106557477	transcript	XM_014119939.2	protein_coding	2	c.173-3341T>G
16	14153208	A	C	PASS	intron_variant	MODIFIER	ZNF786	106557477	transcript	XM_022403811.1	protein_coding	2	c.35-3341T>G
16	14153208	A	C	PASS	intron_variant	MODIFIER	ZNF786	106557477	transcript	XM_005629629.3	protein_coding	3	c.35-3341T>G
16	14153208	A	C	PASS	intron_variant	MODIFIER	ZNF786	106557477	transcript	XM_003432053.4	protein_coding	2	c.146-3341T>G
16	30041166	AG	A	PASS	intergenic_region	MODIFIER	LOC608270-LOC100685458	608270-100685458	intergenic_region	608270-100685458		-1	n.30041167delG
16	30041168	A	T	PASS	intergenic_region	MODIFIER	LOC608270-LOC100685458	608270-100685458	intergenic_region	608270-100685458		-1	n.30041168A>T
16	30348491	G	A	PASS	intergenic_region	MODIFIER	LOC111090193-LOC111090167	111090193-111090167	intergenic_region	111090193-111090167		-1	n.30348491G>A
16	30348492	G	C	PASS	intergenic_region	MODIFIER	LOC111090193-LOC111090167	111090193-111090167	intergenic_region	111090193-111090167		-1	n.30348492G>C
16	30387437	A	C	PASS	intergenic_region	MODIFIER	LOC111090193-LOC111090167	111090193-111090167	intergenic_region	111090193-111090167		-1	n.30387437A>C
16	30445177	C	T	PASS	intergenic_region	MODIFIER	LOC111090193-LOC111090167	111090193-111090167	intergenic_region	111090193-111090167		-1	n.30445177C>T
16	30484224	T	C	PASS	intergenic_region	MODIFIER	LOC111090193-LOC111090167	111090193-111090167	intergenic_region	111090193-111090167		-1	n.30484224T>C
16	30611720	A	G	PASS	intron_variant	MODIFIER	LOC111090291	111090291	transcript	XR_002614649.1	pseudogene	3	n.1542+599A>G
16	30611720	A	G	PASS	intron_variant	MODIFIER	LOC111090291	111090291	transcript	XR_002614650.1	pseudogene	2	n.356+599A>G
16	31610674	A	G	PASS	intergenic_region	MODIFIER	FUT10-LOC102152509	503548-102152509	intergenic_region	503548-102152509		-1	n.31610674A>G
16	31643293	T	G	PASS	upstream_gene_variant	MODIFIER	LOC102152509	102152509	transcript	XR_002614659.1	pseudogene	-1	n.-2687T>G
16	31643293	T	G	PASS	upstream_gene_variant	MODIFIER	LOC102152509	102152509	transcript	XR_002614662.1	pseudogene	-1	n.-2687T>G
16	31643293	T	G	PASS	upstream_gene_variant	MODIFIER	LOC102152509	102152509	transcript	XR_002614663.1	pseudogene	-1	n.-2687T>G
16	31643293	T	G	PASS	upstream_gene_variant	MODIFIER	LOC102152509	102152509	transcript	XR_002614665.1	pseudogene	-1	n.-2687T>G
16	31643293	T	G	PASS	upstream_gene_variant	MODIFIER	LOC102152509	102152509	transcript	XR_002614660.1	pseudogene	-1	n.-2687T>G
16	31643293	T	G	PASS	upstream_gene_variant	MODIFIER	LOC102152509	102152509	transcript	XR_002614666.1	pseudogene	-1	n.-2687T>G
16	31643293	T	G	PASS	upstream_gene_variant	MODIFIER	LOC102152509	102152509	transcript	XR_294379.2	pseudogene	-1	n.-2687T>G
16	31643293	T	G	PASS	upstream_gene_variant	MODIFIER	LOC102152509	102152509	transcript	XR_002614661.1	pseudogene	-1	n.-2687T>G
16	31643293	T	G	PASS	upstream_gene_variant	MODIFIER	LOC102152509	102152509	transcript	XR_002614664.1	pseudogene	-1	n.-2687T>G
16	31643293	T	G	PASS	intergenic_region	MODIFIER	FUT10-LOC102152509	503548-102152509	intergenic_region	503548-102152509		-1	n.31643293T>G
16	43452523	C	T	PASS	intron_variant	MODIFIER	LOC100682675	100682675	transcript	100682675	pseudogene	1	n.80+4893C>T
16	47307190	C	T	PASS	intron_variant	MODIFIER	LOC102156721	102156721	transcript	XM_005630047.3	protein_coding	1	c.-22+106G>A
16	47307283	T	C	PASS	intron_variant	MODIFIER	LOC102156721	102156721	transcript	XM_005630047.3	protein_coding	1	c.-22+13A>G
16	50812740	C	T	PASS	3_prime_UTR_variant	MODIFIER	LOC102157035	102157035	transcript	XM_022403626.1	protein_coding	4	c.*69C>T
16	50812743	T	C	PASS	3_prime_UTR_variant	MODIFIER	LOC102157035	102157035	transcript	XM_022403626.1	protein_coding	4	c.*72T>C
16	51060585	ATCCTTGGGTGTATCTTTTTTTTTTCTTTTTTTTTTTTTTTATTTATTTACTTATGATAGTCACAGAGAGAGAGAGGCAGAGACACAGGCAGAGGGAGAAGCAGGCTCCATGCATCGGGAGCCTGATATGGGATTCGATCCCGGGTCTCCAGGATTGCGCCCTGGGCCAAAGGCAGGCGCCAAACCGCTGCGCCACCCAGGGATCCC	A	PASS	intergenic_region	MODIFIER	LOC102157108-LOC100685409	102157108-100685409	intergenic_region	102157108-100685409		-1	n.51060586_51060791del
17	9776870	AAACATTTTTATTTATTTATGATAGTCACAGAGAGATAGAGGCAGAGACATAGGCAGAGGGAGAAGCAGGCTCCATGCACCGAGAGCCCGATGTGGGATTCGATCCCGGGTCTCCAGGATTGCGCCCTGGGGCAAAGGCAGGCGCCAAACCGCTGCGCCACCCAGGGATCCCTTTTTTT	A	PASS	intergenic_region	MODIFIER	LOC111090417-LOC100684124	111090417-100684124	intergenic_region	111090417-100684124		-1	n.9776871_9777048del
17	20050424	T	A	PASS	intron_variant	MODIFIER	ASXL2	100684260	transcript	XM_022404522.1	protein_coding	2	c.-28+12360A>T
17	24252925	T	A	PASS	intron_variant	MODIFIER	LCLAT1	483023	transcript	XM_022404613.1	protein_coding	5	c.628+3599T>A
17	24252925	T	A	PASS	intron_variant	MODIFIER	LCLAT1	483023	transcript	XM_022404614.1	protein_coding	5	c.628+3599T>A
17	24252925	T	A	PASS	intron_variant	MODIFIER	LCLAT1	483023	transcript	XM_022404615.1	protein_coding	4	c.628+3599T>A
17	28343857	A	T	PASS	intergenic_region	MODIFIER	LOC111090427-LOC111090428	111090427-111090428	intergenic_region	111090427-111090428		-1	n.28343857A>T
17	33238710	C	T	PASS	intron_variant	MODIFIER	LOC102151150	102151150	transcript	XR_002615238.1	pseudogene	5	n.878-4810G>A
17	33238710	C	T	PASS	intron_variant	MODIFIER	LOC102151150	102151150	transcript	XR_002615240.1	pseudogene	5	n.878-4810G>A
17	33238710	C	T	PASS	intron_variant	MODIFIER	LOC102151150	102151150	transcript	XR_002615239.1	pseudogene	5	n.878-5662G>A
17	33238710	C	T	PASS	intron_variant	MODIFIER	LOC102151150	102151150	transcript	XR_002615242.1	pseudogene	5	n.878-5662G>A
17	33238710	C	T	PASS	intron_variant	MODIFIER	LOC102151150	102151150	transcript	XR_002615244.1	pseudogene	6	n.1038-7785G>A
17	33238710	C	T	PASS	intron_variant	MODIFIER	LOC102151150	102151150	transcript	XR_002615246.1	pseudogene	6	n.1008-7785G>A
17	33238710	C	T	PASS	intron_variant	MODIFIER	LOC102151150	102151150	transcript	XR_002615247.1	pseudogene	4	n.735-7785G>A
17	33238710	C	T	PASS	intron_variant	MODIFIER	LOC102151150	102151150	transcript	XR_002615249.1	pseudogene	5	n.574-7785G>A
17	33238710	C	T	PASS	intron_variant	MODIFIER	LOC102151150	102151150	transcript	XR_002615248.1	pseudogene	5	n.772-7785G>A
17	33238710	C	T	PASS	intron_variant	MODIFIER	LOC102151150	102151150	transcript	XR_002615241.1	pseudogene	5	n.643-7785G>A
17	33238710	C	T	PASS	intron_variant	MODIFIER	LOC102151150	102151150	transcript	XR_002615236.1	pseudogene	5	n.878-7785G>A
17	33238710	C	T	PASS	intron_variant	MODIFIER	LOC102151150	102151150	transcript	XR_001318051.2	pseudogene	5	n.878-7785G>A
17	33238710	C	T	PASS	intron_variant	MODIFIER	LOC102151150	102151150	transcript	XR_002615237.1	pseudogene	5	n.878-7785G>A
17	33238710	C	T	PASS	intron_variant	MODIFIER	LOC102151150	102151150	transcript	XR_002615243.1	pseudogene	5	n.878-7785G>A
17	33319501	C	A	PASS	intron_variant	MODIFIER	LOC102151150	102151150	transcript	XR_002615238.1	pseudogene	4	n.734+4553G>T
17	33319501	C	A	PASS	intron_variant	MODIFIER	LOC102151150	102151150	transcript	XR_002615240.1	pseudogene	4	n.734+4553G>T
17	33319501	C	A	PASS	intron_variant	MODIFIER	LOC102151150	102151150	transcript	XR_002615239.1	pseudogene	4	n.734+4553G>T
17	33319501	C	A	PASS	intron_variant	MODIFIER	LOC102151150	102151150	transcript	XR_002615242.1	pseudogene	4	n.734+4553G>T
17	33319501	C	A	PASS	intron_variant	MODIFIER	LOC102151150	102151150	transcript	XR_002615244.1	pseudogene	5	n.894+4553G>T
17	33319501	C	A	PASS	intron_variant	MODIFIER	LOC102151150	102151150	transcript	XR_002615246.1	pseudogene	5	n.864+4553G>T
17	33319501	C	A	PASS	intron_variant	MODIFIER	LOC102151150	102151150	transcript	XR_002615247.1	pseudogene	4	n.734+4553G>T
17	33319501	C	A	PASS	intron_variant	MODIFIER	LOC102151150	102151150	transcript	XR_002615249.1	pseudogene	4	n.430+4553G>T
17	33319501	C	A	PASS	intron_variant	MODIFIER	LOC102151150	102151150	transcript	XR_002615248.1	pseudogene	4	n.628+4553G>T
17	33319501	C	A	PASS	intron_variant	MODIFIER	LOC102151150	102151150	transcript	XR_002615241.1	pseudogene	4	n.499+4553G>T
17	33319501	C	A	PASS	intron_variant	MODIFIER	LOC102151150	102151150	transcript	XR_002615236.1	pseudogene	4	n.734+4553G>T
17	33319501	C	A	PASS	intron_variant	MODIFIER	LOC102151150	102151150	transcript	XR_001318051.2	pseudogene	4	n.734+4553G>T
17	33319501	C	A	PASS	intron_variant	MODIFIER	LOC102151150	102151150	transcript	XR_002615237.1	pseudogene	4	n.734+4553G>T
17	33319501	C	A	PASS	intron_variant	MODIFIER	LOC102151150	102151150	transcript	XR_002615243.1	pseudogene	4	n.734+4553G>T
17	33319501	C	A	PASS	intron_variant	MODIFIER	LOC102151150	102151150	transcript	XR_001318052.2	pseudogene	4	n.734+4553G>T
17	33621402	C	T	PASS	intergenic_region	MODIFIER	LOC102151259-LOC111090433	102151259-111090433	intergenic_region	102151259-111090433		-1	n.33621402C>T
17	33796071	A	G	PASS	intron_variant	MODIFIER	EML4	483048	transcript	XM_005630380.3	protein_coding	1	c.25+21326A>G
17	33870308	A	G	PASS	intron_variant	MODIFIER	EML4	483048	transcript	XM_014120446.2	protein_coding	7	c.742+7071A>G
17	33870308	A	G	PASS	intron_variant	MODIFIER	EML4	483048	transcript	XM_005630380.3	protein_coding	7	c.700+7071A>G
17	33870308	A	G	PASS	intron_variant	MODIFIER	EML4	483048	transcript	XM_014120447.2	protein_coding	6	c.709+7302A>G
17	33870308	A	G	PASS	intron_variant	MODIFIER	EML4	483048	transcript	XM_014120448.2	protein_coding	6	c.568+7071A>G
17	33870308	A	G	PASS	intron_variant	MODIFIER	EML4	483048	transcript	XM_014120449.2	protein_coding	5	c.535+7302A>G
17	33942416	G	A	PASS	non_coding_transcript_exon_variant	MODIFIER	LOC111090591	111090591	transcript	XR_002615254.1	pseudogene	1	n.44C>T
17	34036860	T	C	PASS	intron_variant	MODIFIER	KCNG3	483049	transcript	XM_003432199.4	protein_coding	1	c.666-792A>G
17	34036860	T	C	PASS	intron_variant	MODIFIER	KCNG3	483049	transcript	XM_022404667.1	protein_coding	1	c.666-792A>G
17	34036860	T	C	PASS	intron_variant	MODIFIER	KCNG3	483049	transcript	XM_022404669.1	protein_coding	1	c.666-792A>G
17	34036860	T	C	PASS	intron_variant	MODIFIER	KCNG3	483049	transcript	XM_022404671.1	protein_coding	1	c.666-792A>G
17	34036860	T	C	PASS	intron_variant	MODIFIER	KCNG3	483049	transcript	XM_022404672.1	protein_coding	1	c.633-792A>G
17	34036860	T	C	PASS	intron_variant	MODIFIER	KCNG3	483049	transcript	XM_014120550.2	protein_coding	1	c.666-792A>G
17	34036860	T	C	PASS	intron_variant	MODIFIER	KCNG3	483049	transcript	XM_014120551.2	protein_coding	1	c.666-792A>G
17	34036860	T	C	PASS	intron_variant	MODIFIER	KCNG3	483049	transcript	XM_022404668.1	protein_coding	1	c.666-792A>G
17	34036860	T	C	PASS	intron_variant	MODIFIER	KCNG3	483049	transcript	XM_022404670.1	protein_coding	1	c.666-792A>G
17	34036860	T	C	PASS	intron_variant	MODIFIER	KCNG3	483049	transcript	XR_002615255.1	pseudogene	1	n.691-792A>G
17	34036860	T	C	PASS	intron_variant	MODIFIER	KCNG3	483049	transcript	XR_002615256.1	pseudogene	1	n.691-792A>G
17	34036860	T	C	PASS	intron_variant	MODIFIER	KCNG3	483049	transcript	XR_002615257.1	pseudogene	1	n.691-792A>G
17	34036860	T	C	PASS	intron_variant	MODIFIER	KCNG3	483049	transcript	XM_014120549.2	protein_coding	1	c.666-792A>G
17	34036860	T	C	PASS	intron_variant	MODIFIER	KCNG3	483049	transcript	XM_858942.5	protein_coding	1	c.633-792A>G
17	34150931	TA	T	PASS	intergenic_region	MODIFIER	KCNG3-LOC111090593	483049-111090593	intergenic_region	483049-111090593		-1	n.34150932delA
17	34332512	G	A	PASS	upstream_gene_variant	MODIFIER	ARID5A	483050	transcript	XM_022404674.1	protein_coding	-1	c.-2692C>T
17	34332512	G	A	PASS	upstream_gene_variant	MODIFIER	ARID5A	483050	transcript	XM_022404676.1	protein_coding	-1	c.-2692C>T
17	34332512	G	A	PASS	upstream_gene_variant	MODIFIER	ARID5A	483050	transcript	XM_022404675.1	protein_coding	-1	c.-2692C>T
17	34332512	G	A	PASS	upstream_gene_variant	MODIFIER	ARID5A	483050	transcript	XM_022404678.1	protein_coding	-1	c.-8265C>T
17	34332512	G	A	PASS	intron_variant	MODIFIER	ARID5A	483050	transcript	XM_005630383.3	protein_coding	1	c.-167+1048C>T
17	34332512	G	A	PASS	intron_variant	MODIFIER	ARID5A	483050	transcript	XM_022404677.1	protein_coding	1	c.4+1048C>T
17	34332512	G	A	PASS	intron_variant	MODIFIER	ARID5A	483050	transcript	XM_540165.6	protein_coding	1	c.4+1048C>T
17	34560081	C	A	PASS	downstream_gene_variant	MODIFIER	STARD7	475744	transcript	XR_002615269.1	pseudogene	-1	n.*1864C>A
17	34560081	C	A	PASS	downstream_gene_variant	MODIFIER	STARD7	475744	transcript	XM_022404685.1	protein_coding	-1	c.*2532C>A
17	34560081	C	A	PASS	downstream_gene_variant	MODIFIER	STARD7	475744	transcript	XM_532951.6	protein_coding	-1	c.*5087C>A
17	34560081	C	A	PASS	intron_variant	MODIFIER	STARD7	475744	transcript	XM_022404684.1	protein_coding	8	c.1109-2330C>A
17	34560081	C	A	PASS	intron_variant	MODIFIER	STARD7	475744	transcript	XM_022404686.1	protein_coding	7	c.959-2330C>A
17	34560081	C	A	PASS	intron_variant	MODIFIER	STARD7	475744	transcript	XR_002615270.1	pseudogene	8	n.1630-2330C>A
17	34970605	G	A	PASS	intergenic_region	MODIFIER	MRPS5-MAL	475746-403933	intergenic_region	475746-403933		-1	n.34970605G>A
17	36502498	C	T	PASS	intron_variant	MODIFIER	TMEM87B	611784	transcript	XM_005630438.3	protein_coding	15	c.1453+3035C>T
17	36502498	C	T	PASS	intron_variant	MODIFIER	TMEM87B	611784	transcript	XM_005630440.2	protein_coding	15	c.1264+3035C>T
17	36502498	C	T	PASS	intron_variant	MODIFIER	TMEM87B	611784	transcript	XM_022404716.1	protein_coding	15	c.1453+3035C>T
17	36502498	C	T	PASS	intron_variant	MODIFIER	TMEM87B	611784	transcript	XM_022404712.1	protein_coding	15	c.1453+3035C>T
17	36502498	C	T	PASS	intron_variant	MODIFIER	TMEM87B	611784	transcript	XM_005630439.3	protein_coding	15	c.1453+3035C>T
17	36502498	C	T	PASS	intron_variant	MODIFIER	TMEM87B	611784	transcript	XM_022404713.1	protein_coding	15	c.1378+3035C>T
17	36502498	C	T	PASS	intron_variant	MODIFIER	TMEM87B	611784	transcript	XM_022404715.1	protein_coding	15	c.1264+3035C>T
17	36502498	C	T	PASS	intron_variant	MODIFIER	TMEM87B	611784	transcript	XM_022404714.1	protein_coding	15	c.1264+3035C>T
17	37787870	C	G	PASS	intergenic_region	MODIFIER	LOC111090620-LOC111090619	111090620-111090619	intergenic_region	111090620-111090619		-1	n.37787870C>G
17	37787872	G	A	PASS	intergenic_region	MODIFIER	LOC111090620-LOC111090619	111090620-111090619	intergenic_region	111090620-111090619		-1	n.37787872G>A
17	37787874	G	A	PASS	intergenic_region	MODIFIER	LOC111090620-LOC111090619	111090620-111090619	intergenic_region	111090620-111090619		-1	n.37787874G>A
17	37787891	C	G	PASS	intergenic_region	MODIFIER	LOC111090620-LOC111090619	111090620-111090619	intergenic_region	111090620-111090619		-1	n.37787891C>G
17	37787913	GC	G	PASS	intergenic_region	MODIFIER	LOC111090620-LOC111090619	111090620-111090619	intergenic_region	111090620-111090619		-1	n.37787914delC
17	37787916	T	A	PASS	intergenic_region	MODIFIER	LOC111090620-LOC111090619	111090620-111090619	intergenic_region	111090620-111090619		-1	n.37787916T>A
17	37787946	G	A	PASS	intergenic_region	MODIFIER	LOC111090620-LOC111090619	111090620-111090619	intergenic_region	111090620-111090619		-1	n.37787946G>A
17	37787988	T	A	PASS	intergenic_region	MODIFIER	LOC111090620-LOC111090619	111090620-111090619	intergenic_region	111090620-111090619		-1	n.37787988T>A
17	37787994	T	C	PASS	intergenic_region	MODIFIER	LOC111090620-LOC111090619	111090620-111090619	intergenic_region	111090620-111090619		-1	n.37787994T>C
17	37787999	G	T	PASS	intergenic_region	MODIFIER	LOC111090620-LOC111090619	111090620-111090619	intergenic_region	111090620-111090619		-1	n.37787999G>T
17	52360255	G	A	PASS	intron_variant	MODIFIER	DENND2C	483130	transcript	XM_005630642.1	protein_coding	1	c.-194+14497C>T
17	52360255	G	A	PASS	intron_variant	MODIFIER	DENND2C	483130	transcript	XM_005630643.1	protein_coding	1	c.-194+14497C>T
17	52360255	G	A	PASS	intron_variant	MODIFIER	DENND2C	483130	transcript	XM_014120681.1	protein_coding	1	c.-194+14497C>T
17	52960153	CT	C	PASS	intergenic_region	MODIFIER	NGF-VANGL1	403402-483133	intergenic_region	403402-483133		-1	n.52960154delT
17	57540668	A	AGCTCTGAGGCTCCTGCTCCTGCTCCTGCTCTGAGGCTCCTGCTCCTGCTCCTGCTCCTGCTCCTGCTCCGAGGCTCCTGCTCCTGCTCCTGCTCCT	PASS	intergenic_region	MODIFIER	LOC111090699-LOC102155768	111090699-102155768	intergenic_region	111090699-102155768		-1	n.57540668_57540669insGCTCTGAGGCTCCTGCTCCTGCTCCTGCTCTGAGGCTCCTGCTCCTGCTCCTGCTCCTGCTCCTGCTCCGAGGCTCCTGCTCCTGCTCCTGCTCCT
18	1037582	C	T	PASS	intergenic_region	MODIFIER	LOC111090792-LOC100687275	111090792-100687275	intergenic_region	111090792-100687275		-1	n.1037582C>T
18	3835423	C	G	PASS	intergenic_region	MODIFIER	LOC100687611-LOC111090859	100687611-111090859	intergenic_region	100687611-111090859		-1	n.3835423C>G
18	3835769	A	C	PASS	intergenic_region	MODIFIER	LOC100687611-LOC111090859	100687611-111090859	intergenic_region	100687611-111090859		-1	n.3835769A>C
18	4691535	T	G	PASS	intergenic_region	MODIFIER	LOC111090862-LOC111090796	111090862-111090796	intergenic_region	111090862-111090796		-1	n.4691535T>G
18	5424934	A	G	PASS	intergenic_region	MODIFIER	VSTM2A-LOC106559941	608324-106559941	intergenic_region	608324-106559941		-1	n.5424934A>G
18	5425360	T	G	PASS	intergenic_region	MODIFIER	VSTM2A-LOC106559941	608324-106559941	intergenic_region	608324-106559941		-1	n.5425360T>G
18	5447513	A	AT	PASS	intergenic_region	MODIFIER	VSTM2A-LOC106559941	608324-106559941	intergenic_region	608324-106559941		-1	n.5447513_5447514insT
18	14738038	C	CTCACAGCAAGGCTTCTTTTTTTTTTTTTTTTTTTTTTTTTTTTTTTTTTTTTTTTTTTTTTTTTTTTT	PASS	upstream_gene_variant	MODIFIER	ATXN7L1	475892	transcript	XM_014120791.2	protein_coding	-1	c.-26454_-26453insTCACAGCAAGGCTTCTTTTTTTTTTTTTTTTTTTTTTTTTTTTTTTTTTTTTTTTTTTTTTTTTTTTT
18	14738038	C	CTCACAGCAAGGCTTCTTTTTTTTTTTTTTTTTTTTTTTTTTTTTTTTTTTTTTTTTTTTTTTTTTTTT	PASS	intron_variant	MODIFIER	ATXN7L1	475892	transcript	XM_022405208.1	protein_coding	1	c.104-26437_104-26436insTCACAGCAAGGCTTCTTTTTTTTTTTTTTTTTTTTTTTTTTTTTTTTTTTTTTTTTTTTTTTTTTTTT
18	14738038	C	CTCACAGCAAGGCTTCTTTTTTTTTTTTTTTTTTTTTTTTTTTTTTTTTTTTTTTTTTTTTTTTTTTTT	PASS	intron_variant	MODIFIER	ATXN7L1	475892	transcript	XM_022405209.1	protein_coding	1	c.104-26437_104-26436insTCACAGCAAGGCTTCTTTTTTTTTTTTTTTTTTTTTTTTTTTTTTTTTTTTTTTTTTTTTTTTTTTTT
18	14738038	C	CTCACAGCAAGGCTTCTTTTTTTTTTTTTTTTTTTTTTTTTTTTTTTTTTTTTTTTTTTTTTTTTTTTT	PASS	intron_variant	MODIFIER	ATXN7L1	475892	transcript	XM_022405211.1	protein_coding	1	c.104-26437_104-26436insTCACAGCAAGGCTTCTTTTTTTTTTTTTTTTTTTTTTTTTTTTTTTTTTTTTTTTTTTTTTTTTTTTT
18	14738038	C	CTCACAGCAAGGCTTCTTTTTTTTTTTTTTTTTTTTTTTTTTTTTTTTTTTTTTTTTTTTTTTTTTTTT	PASS	intron_variant	MODIFIER	ATXN7L1	475892	transcript	XM_022405212.1	protein_coding	1	c.104-26437_104-26436insTCACAGCAAGGCTTCTTTTTTTTTTTTTTTTTTTTTTTTTTTTTTTTTTTTTTTTTTTTTTTTTTTTT
18	14738038	C	CTCACAGCAAGGCTTCTTTTTTTTTTTTTTTTTTTTTTTTTTTTTTTTTTTTTTTTTTTTTTTTTTTTT	PASS	intron_variant	MODIFIER	ATXN7L1	475892	transcript	XR_002615757.1	pseudogene	1	n.106-26437_106-26436insTCACAGCAAGGCTTCTTTTTTTTTTTTTTTTTTTTTTTTTTTTTTTTTTTTTTTTTTTTTTTTTTTTT
18	14863885	A	C	PASS	intron_variant	MODIFIER	RINT1	475893	transcript	XM_005630965.3	protein_coding	4	c.525-1174T>G
18	14863885	A	C	PASS	intron_variant	MODIFIER	RINT1	475893	transcript	XM_005630966.3	protein_coding	3	c.276-1174T>G
18	15018675	C	CTT	PASS	intron_variant	MODIFIER	SRPK2	475894	transcript	XM_005630967.3	protein_coding	1	c.71+27246_71+27247insTT
18	15018675	C	CTT	PASS	intron_variant	MODIFIER	SRPK2	475894	transcript	XM_005630974.3	protein_coding	1	c.71+27246_71+27247insTT
18	15018675	C	CTT	PASS	intron_variant	MODIFIER	SRPK2	475894	transcript	XM_022405217.1	protein_coding	1	c.71+27246_71+27247insTT
18	15018675	C	CTT	PASS	intron_variant	MODIFIER	SRPK2	475894	transcript	XR_002615760.1	pseudogene	1	n.242+27246_242+27247insTT
18	15018675	C	CTT	PASS	intron_variant	MODIFIER	SRPK2	475894	transcript	XM_022405218.1	protein_coding	1	c.71+27246_71+27247insTT
18	15018675	C	CTT	PASS	intron_variant	MODIFIER	SRPK2	475894	transcript	XM_022405219.1	protein_coding	1	c.-105+27246_-105+27247insTT
18	15018675	C	CTT	PASS	intron_variant	MODIFIER	SRPK2	475894	transcript	XR_002615759.1	pseudogene	1	n.242+27246_242+27247insTT
18	15018675	C	CTT	PASS	intron_variant	MODIFIER	SRPK2	475894	transcript	XM_005630973.3	protein_coding	1	c.71+27246_71+27247insTT
18	15018675	C	CTT	PASS	intron_variant	MODIFIER	SRPK2	475894	transcript	XM_022405216.1	protein_coding	1	c.2+27368_2+27369insTT
18	15018675	C	CTT	PASS	intron_variant	MODIFIER	SRPK2	475894	transcript	XM_022405215.1	protein_coding	1	c.5+19206_5+19207insTT
18	15366117	G	C	PASS	intergenic_region	MODIFIER	LOC111091026-LOC100684455	111091026-100684455	intergenic_region	111091026-100684455		-1	n.15366117G>C
18	17941798	G	C	PASS	intergenic_region	MODIFIER	PHTF2-MAGI2	483280-475904	intergenic_region	483280-475904		-1	n.17941798G>C
18	22673297	G	A	PASS	intron_variant	MODIFIER	PCLO	483388	transcript	XM_022405104.1	protein_coding	3	c.3117+5808C>T
18	28474465	A	AAAG	PASS	intron_variant	MODIFIER	LRRC4C	483417	transcript	XM_005631098.3	protein_coding	5	c.-209+94815_-209+94816insAAG
18	28474465	A	AAAG	PASS	intron_variant	MODIFIER	LRRC4C	483417	transcript	XM_005631099.3	protein_coding	5	c.-209+94815_-209+94816insAAG
18	28474465	A	AAAG	PASS	intron_variant	MODIFIER	LRRC4C	483417	transcript	XM_005631100.3	protein_coding	4	c.-209+94815_-209+94816insAAG
18	28474465	A	AAAG	PASS	intron_variant	MODIFIER	LRRC4C	483417	transcript	XM_014121147.2	protein_coding	6	c.-209+94815_-209+94816insAAG
18	28474465	A	AAAG	PASS	intron_variant	MODIFIER	LRRC4C	483417	transcript	XM_022405301.1	protein_coding	6	c.-209+94815_-209+94816insAAG
18	28474465	A	AAAG	PASS	intron_variant	MODIFIER	LRRC4C	483417	transcript	XM_022405302.1	protein_coding	6	c.-142+94815_-142+94816insAAG
18	29571393	CT	C	PASS	intergenic_region	MODIFIER	LOC100688663-LOC100688733	100688663-100688733	intergenic_region	100688663-100688733		-1	n.29571394delT
18	30488519	T	C	PASS	intron_variant	MODIFIER	LOC111090810	111090810	transcript	XR_002615616.1	pseudogene	5	n.422-1790T>C
18	42827809	C	G	PASS	intron_variant	MODIFIER	ARHGAP1	483631	transcript	NM_001083367.1	protein_coding	4	c.450-122C>G
18	42827809	C	G	PASS	intron_variant	MODIFIER	ARHGAP1	483631	transcript	XM_005631051.3	protein_coding	5	c.450-122C>G
18	42827809	C	G	PASS	intron_variant	MODIFIER	ARHGAP1	483631	transcript	XM_005631052.3	protein_coding	5	c.450-122C>G
18	42827809	C	G	PASS	intron_variant	MODIFIER	ARHGAP1	483631	transcript	XM_022405071.1	protein_coding	5	c.450-122C>G
18	42844306	G	A	PASS	intron_variant	MODIFIER	ATG13	483632	transcript	XM_005631277.3	protein_coding	12	c.790-87C>T
18	42844306	G	A	PASS	intron_variant	MODIFIER	ATG13	483632	transcript	XM_005631280.3	protein_coding	10	c.790-87C>T
18	42844306	G	A	PASS	intron_variant	MODIFIER	ATG13	483632	transcript	XM_014121116.2	protein_coding	12	c.790-87C>T
18	42844306	G	A	PASS	intron_variant	MODIFIER	ATG13	483632	transcript	XM_014121117.2	protein_coding	11	c.790-87C>T
18	42844306	G	A	PASS	intron_variant	MODIFIER	ATG13	483632	transcript	XM_014121118.2	protein_coding	12	c.790-87C>T
18	42844306	G	A	PASS	intron_variant	MODIFIER	ATG13	483632	transcript	XM_014121119.2	protein_coding	12	c.790-87C>T
18	42844306	G	A	PASS	intron_variant	MODIFIER	ATG13	483632	transcript	XM_014121121.2	protein_coding	12	c.790-944C>T
18	42844306	G	A	PASS	intron_variant	MODIFIER	ATG13	483632	transcript	XM_014121122.2	protein_coding	12	c.790-971C>T
18	42844306	G	A	PASS	intron_variant	MODIFIER	ATG13	483632	transcript	XM_014121123.2	protein_coding	12	c.790-1466C>T
18	42844306	G	A	PASS	intron_variant	MODIFIER	ATG13	483632	transcript	XM_022405478.1	protein_coding	11	c.790-87C>T
18	42844306	G	A	PASS	intron_variant	MODIFIER	ATG13	483632	transcript	XM_022405479.1	protein_coding	12	c.790-87C>T
18	42844306	G	A	PASS	intron_variant	MODIFIER	ATG13	483632	transcript	XM_022405480.1	protein_coding	11	c.790-87C>T
18	42844306	G	A	PASS	intron_variant	MODIFIER	ATG13	483632	transcript	XM_022405481.1	protein_coding	10	c.790-87C>T
18	42844306	G	A	PASS	intron_variant	MODIFIER	ATG13	483632	transcript	XM_022405482.1	protein_coding	12	c.790-944C>T
18	42844306	G	A	PASS	intron_variant	MODIFIER	ATG13	483632	transcript	XM_022405483.1	protein_coding	12	c.790-1466C>T
18	42844306	G	A	PASS	intron_variant	MODIFIER	ATG13	483632	transcript	XM_540752.7	protein_coding	11	c.790-87C>T
18	42882863	T	TAACTGCGTCTCAAAAAAAAAAAAAAAAAAAAAAAAAAAAAAAAAAAAAAAAAA	PASS	upstream_gene_variant	MODIFIER	HARBI1	483633	transcript	XM_005631285.3	protein_coding	-1	c.-5645_-5644insAACTGCGTCTCAAAAAAAAAAAAAAAAAAAAAAAAAAAAAAAAAAAAAAAAAA
18	42882863	T	TAACTGCGTCTCAAAAAAAAAAAAAAAAAAAAAAAAAAAAAAAAAAAAAAAAAA	PASS	upstream_gene_variant	MODIFIER	HARBI1	483633	transcript	XM_540753.5	protein_coding	-1	c.-5645_-5644insAACTGCGTCTCAAAAAAAAAAAAAAAAAAAAAAAAAAAAAAAAAAAAAAAAAA
18	42882863	T	TAACTGCGTCTCAAAAAAAAAAAAAAAAAAAAAAAAAAAAAAAAAAAAAAAAAA	PASS	upstream_gene_variant	MODIFIER	HARBI1	483633	transcript	XM_005631287.2	protein_coding	-1	c.-5645_-5644insAACTGCGTCTCAAAAAAAAAAAAAAAAAAAAAAAAAAAAAAAAAAAAAAAAAA
18	42882863	T	TAACTGCGTCTCAAAAAAAAAAAAAAAAAAAAAAAAAAAAAAAAAAAAAAAAAA	PASS	upstream_gene_variant	MODIFIER	HARBI1	483633	transcript	XM_005631286.3	protein_coding	-1	c.-5645_-5644insAACTGCGTCTCAAAAAAAAAAAAAAAAAAAAAAAAAAAAAAAAAAAAAAAAAA
18	42882863	T	TAACTGCGTCTCAAAAAAAAAAAAAAAAAAAAAAAAAAAAAAAAAAAAAAAAAA	PASS	intron_variant	MODIFIER	ATG13	483632	transcript	XM_005631277.3	protein_coding	2	c.-100+3189_-100+3190insTTTTTTTTTTTTTTTTTTTTTTTTTTTTTTTTTTTTTTTTTTGAGACGCAGTT
18	42882863	T	TAACTGCGTCTCAAAAAAAAAAAAAAAAAAAAAAAAAAAAAAAAAAAAAAAAAA	PASS	intron_variant	MODIFIER	ATG13	483632	transcript	XM_005631280.3	protein_coding	1	c.-14+3677_-14+3678insTTTTTTTTTTTTTTTTTTTTTTTTTTTTTTTTTTTTTTTTTTGAGACGCAGTT
18	42882863	T	TAACTGCGTCTCAAAAAAAAAAAAAAAAAAAAAAAAAAAAAAAAAAAAAAAAAA	PASS	intron_variant	MODIFIER	ATG13	483632	transcript	XM_014121116.2	protein_coding	2	c.-179+3189_-179+3190insTTTTTTTTTTTTTTTTTTTTTTTTTTTTTTTTTTTTTTTTTTGAGACGCAGTT
18	42882863	T	TAACTGCGTCTCAAAAAAAAAAAAAAAAAAAAAAAAAAAAAAAAAAAAAAAAAA	PASS	intron_variant	MODIFIER	ATG13	483632	transcript	XM_014121117.2	protein_coding	1	c.-179+3677_-179+3678insTTTTTTTTTTTTTTTTTTTTTTTTTTTTTTTTTTTTTTTTTTGAGACGCAGTT
18	42882863	T	TAACTGCGTCTCAAAAAAAAAAAAAAAAAAAAAAAAAAAAAAAAAAAAAAAAAA	PASS	intron_variant	MODIFIER	ATG13	483632	transcript	XM_014121118.2	protein_coding	2	c.-179+3189_-179+3190insTTTTTTTTTTTTTTTTTTTTTTTTTTTTTTTTTTTTTTTTTTGAGACGCAGTT
18	42882863	T	TAACTGCGTCTCAAAAAAAAAAAAAAAAAAAAAAAAAAAAAAAAAAAAAAAAAA	PASS	intron_variant	MODIFIER	ATG13	483632	transcript	XM_014121119.2	protein_coding	2	c.-179+3189_-179+3190insTTTTTTTTTTTTTTTTTTTTTTTTTTTTTTTTTTTTTTTTTTGAGACGCAGTT
18	42882863	T	TAACTGCGTCTCAAAAAAAAAAAAAAAAAAAAAAAAAAAAAAAAAAAAAAAAAA	PASS	intron_variant	MODIFIER	ATG13	483632	transcript	XM_014121121.2	protein_coding	2	c.-179+3189_-179+3190insTTTTTTTTTTTTTTTTTTTTTTTTTTTTTTTTTTTTTTTTTTGAGACGCAGTT
18	42882863	T	TAACTGCGTCTCAAAAAAAAAAAAAAAAAAAAAAAAAAAAAAAAAAAAAAAAAA	PASS	intron_variant	MODIFIER	ATG13	483632	transcript	XM_014121122.2	protein_coding	2	c.-179+3189_-179+3190insTTTTTTTTTTTTTTTTTTTTTTTTTTTTTTTTTTTTTTTTTTGAGACGCAGTT
18	42882863	T	TAACTGCGTCTCAAAAAAAAAAAAAAAAAAAAAAAAAAAAAAAAAAAAAAAAAA	PASS	intron_variant	MODIFIER	ATG13	483632	transcript	XM_014121123.2	protein_coding	2	c.-179+3189_-179+3190insTTTTTTTTTTTTTTTTTTTTTTTTTTTTTTTTTTTTTTTTTTGAGACGCAGTT
18	42882863	T	TAACTGCGTCTCAAAAAAAAAAAAAAAAAAAAAAAAAAAAAAAAAAAAAAAAAA	PASS	intron_variant	MODIFIER	ATG13	483632	transcript	XM_022405478.1	protein_coding	1	c.-100+3677_-100+3678insTTTTTTTTTTTTTTTTTTTTTTTTTTTTTTTTTTTTTTTTTTGAGACGCAGTT
18	42882863	T	TAACTGCGTCTCAAAAAAAAAAAAAAAAAAAAAAAAAAAAAAAAAAAAAAAAAA	PASS	intron_variant	MODIFIER	ATG13	483632	transcript	XM_022405479.1	protein_coding	2	c.-179+3189_-179+3190insTTTTTTTTTTTTTTTTTTTTTTTTTTTTTTTTTTTTTTTTTTGAGACGCAGTT
18	42882863	T	TAACTGCGTCTCAAAAAAAAAAAAAAAAAAAAAAAAAAAAAAAAAAAAAAAAAA	PASS	intron_variant	MODIFIER	ATG13	483632	transcript	XM_022405480.1	protein_coding	2	c.-14+3189_-14+3190insTTTTTTTTTTTTTTTTTTTTTTTTTTTTTTTTTTTTTTTTTTGAGACGCAGTT
18	42882863	T	TAACTGCGTCTCAAAAAAAAAAAAAAAAAAAAAAAAAAAAAAAAAAAAAAAAAA	PASS	intron_variant	MODIFIER	ATG13	483632	transcript	XM_022405481.1	protein_coding	1	c.-14+3888_-14+3889insTTTTTTTTTTTTTTTTTTTTTTTTTTTTTTTTTTTTTTTTTTGAGACGCAGTT
18	42882863	T	TAACTGCGTCTCAAAAAAAAAAAAAAAAAAAAAAAAAAAAAAAAAAAAAAAAAA	PASS	intron_variant	MODIFIER	ATG13	483632	transcript	XM_022405482.1	protein_coding	2	c.-179+3189_-179+3190insTTTTTTTTTTTTTTTTTTTTTTTTTTTTTTTTTTTTTTTTTTGAGACGCAGTT
18	42882863	T	TAACTGCGTCTCAAAAAAAAAAAAAAAAAAAAAAAAAAAAAAAAAAAAAAAAAA	PASS	intron_variant	MODIFIER	ATG13	483632	transcript	XM_022405483.1	protein_coding	2	c.-179+3189_-179+3190insTTTTTTTTTTTTTTTTTTTTTTTTTTTTTTTTTTTTTTTTTTGAGACGCAGTT
18	42882863	T	TAACTGCGTCTCAAAAAAAAAAAAAAAAAAAAAAAAAAAAAAAAAAAAAAAAAA	PASS	intron_variant	MODIFIER	ATG13	483632	transcript	XM_540752.7	protein_coding	2	c.-14+3189_-14+3190insTTTTTTTTTTTTTTTTTTTTTTTTTTTTTTTTTTTTTTTTTTGAGACGCAGTT
18	42936300	A	C	PASS	intron_variant	MODIFIER	AMBRA1	483634	transcript	XM_005631289.3	protein_coding	6	c.619-76A>C
18	42936300	A	C	PASS	intron_variant	MODIFIER	AMBRA1	483634	transcript	XM_022405477.1	protein_coding	6	c.619-76A>C
18	42936300	A	C	PASS	intron_variant	MODIFIER	AMBRA1	483634	transcript	XM_005631291.3	protein_coding	6	c.619-76A>C
18	42936300	A	C	PASS	intron_variant	MODIFIER	AMBRA1	483634	transcript	XM_005631292.3	protein_coding	6	c.619-76A>C
18	42936300	A	C	PASS	intron_variant	MODIFIER	AMBRA1	483634	transcript	XM_540754.5	protein_coding	6	c.619-76A>C
18	42936300	A	C	PASS	intron_variant	MODIFIER	AMBRA1	483634	transcript	XM_005631290.2	protein_coding	6	c.619-76A>C
18	42939895	C	T	PASS	intron_variant	MODIFIER	AMBRA1	483634	transcript	XM_005631289.3	protein_coding	7	c.2072+2066C>T
18	42939895	C	T	PASS	intron_variant	MODIFIER	AMBRA1	483634	transcript	XM_022405477.1	protein_coding	7	c.2072+2066C>T
18	42939895	C	T	PASS	intron_variant	MODIFIER	AMBRA1	483634	transcript	XM_005631291.3	protein_coding	7	c.2072+2066C>T
18	42939895	C	T	PASS	intron_variant	MODIFIER	AMBRA1	483634	transcript	XM_005631292.3	protein_coding	8	c.1802+2066C>T
18	42939895	C	T	PASS	intron_variant	MODIFIER	AMBRA1	483634	transcript	XM_540754.5	protein_coding	8	c.1802+2066C>T
18	42939895	C	T	PASS	intron_variant	MODIFIER	AMBRA1	483634	transcript	XM_005631290.2	protein_coding	7	c.2072+2066C>T
18	43071723	G	A	PASS	upstream_gene_variant	MODIFIER	LOC111090970	111090970	transcript	XR_002615946.1	pseudogene	-1	n.-120C>T
18	43071723	G	A	PASS	intron_variant	MODIFIER	AMBRA1	483634	transcript	XM_005631289.3	protein_coding	17	c.3401-599G>A
18	43071723	G	A	PASS	intron_variant	MODIFIER	AMBRA1	483634	transcript	XM_022405477.1	protein_coding	15	c.3137-599G>A
18	43071723	G	A	PASS	intron_variant	MODIFIER	AMBRA1	483634	transcript	XM_005631291.3	protein_coding	16	c.3314-599G>A
18	43071723	G	A	PASS	intron_variant	MODIFIER	AMBRA1	483634	transcript	XM_005631292.3	protein_coding	17	c.3044-599G>A
18	43071723	G	A	PASS	intron_variant	MODIFIER	AMBRA1	483634	transcript	XM_540754.5	protein_coding	18	c.3131-599G>A
18	43071723	G	A	PASS	intron_variant	MODIFIER	AMBRA1	483634	transcript	XM_005631290.2	protein_coding	17	c.3401-599G>A
18	53085104	A	G	PASS	intergenic_region	MODIFIER	NAA40-RCOR2	476041-483768	intergenic_region	476041-483768		-1	n.53085104A>G
19	13291751	G	T	PASS	intergenic_region	MODIFIER	INTU-LOC100687837	607233-100687837	intergenic_region	607233-100687837		-1	n.13291751G>T
19	17501466	G	GAGAGGCAGAGACACAGGCAGAGGGAGAAGCAGGC	PASS	intergenic_region	MODIFIER	FGF2-BBS12	403857-100686286	intergenic_region	403857-100686286		-1	n.17501466_17501467insAGAGGCAGAGACACAGGCAGAGGGAGAAGCAGGC
19	21372531	G	T	PASS	intergenic_region	MODIFIER	LOC100683328-LOC111091051	100683328-111091051	intergenic_region	100683328-111091051		-1	n.21372531G>T
19	26367994	A	G	PASS	intron_variant	MODIFIER	CNTNAP5	483874	transcript	XM_005631764.3	protein_coding	1	c.82+29622T>C
19	26367994	A	G	PASS	intron_variant	MODIFIER	CNTNAP5	483874	transcript	NM_001048108.1	protein_coding	1	c.82+29622T>C
19	26367997	C	G	PASS	intron_variant	MODIFIER	CNTNAP5	483874	transcript	XM_005631764.3	protein_coding	1	c.82+29619G>C
19	26367997	C	G	PASS	intron_variant	MODIFIER	CNTNAP5	483874	transcript	NM_001048108.1	protein_coding	1	c.82+29619G>C
19	30980065	T	A	PASS	intergenic_region	MODIFIER	LOC111091059-MARCO	111091059-476117	intergenic_region	111091059-476117		-1	n.30980065T>A
19	37854308	TTTTTGTTTTTTG	T	PASS	intergenic_region	MODIFIER	MAP3K19-RAB3GAP1	483897-476127	intergenic_region	483897-476127		-1	n.37854309_37854320delTTTTGTTTTTTG
19	37866337	G	A	GATKstd	intron_variant	MODIFIER	RAB3GAP1	476127	transcript	XM_851254.5	protein_coding	2	c.75-1005G>A
19	37866337	G	A	GATKstd	intron_variant	MODIFIER	RAB3GAP1	476127	transcript	XM_022406116.1	protein_coding	2	c.75-1005G>A
19	37866337	G	A	GATKstd	intron_variant	MODIFIER	RAB3GAP1	476127	transcript	XM_533334.6	protein_coding	2	c.75-1005G>A
19	37866337	G	A	GATKstd	intron_variant	MODIFIER	RAB3GAP1	476127	transcript	XR_002616414.1	pseudogene	2	n.98-1005G>A
19	37866337	G	A	GATKstd	intron_variant	MODIFIER	RAB3GAP1	476127	transcript	XM_022406114.1	protein_coding	2	c.75-1005G>A
19	37866337	G	A	GATKstd	intron_variant	MODIFIER	RAB3GAP1	476127	transcript	XM_022406115.1	protein_coding	2	c.75-1005G>A
19	37866337	G	A	GATKstd	intron_variant	MODIFIER	RAB3GAP1	476127	transcript	XR_002616408.1	pseudogene	2	n.98-1005G>A
19	37866337	G	A	GATKstd	intron_variant	MODIFIER	RAB3GAP1	476127	transcript	XR_002616409.1	pseudogene	2	n.98-1005G>A
19	37866337	G	A	GATKstd	intron_variant	MODIFIER	RAB3GAP1	476127	transcript	XR_002616410.1	pseudogene	2	n.98-1005G>A
19	37866337	G	A	GATKstd	intron_variant	MODIFIER	RAB3GAP1	476127	transcript	XR_002616412.1	pseudogene	2	n.98-1005G>A
19	37866337	G	A	GATKstd	intron_variant	MODIFIER	RAB3GAP1	476127	transcript	XR_002616413.1	pseudogene	2	n.98-1005G>A
19	37866337	G	A	GATKstd	intron_variant	MODIFIER	RAB3GAP1	476127	transcript	XR_002616415.1	pseudogene	2	n.98-1005G>A
19	37866337	G	A	GATKstd	intron_variant	MODIFIER	RAB3GAP1	476127	transcript	XR_002616416.1	pseudogene	2	n.98-1005G>A
19	37866337	G	A	GATKstd	intron_variant	MODIFIER	RAB3GAP1	476127	transcript	XM_005631944.3	protein_coding	2	c.9+4297G>A
19	37960256	G	GT	PASS	downstream_gene_variant	MODIFIER	RAB3GAP1	476127	transcript	XM_851254.5	protein_coding	-1	c.*3249_*3250insT
19	37960256	G	GT	PASS	downstream_gene_variant	MODIFIER	RAB3GAP1	476127	transcript	XM_022406116.1	protein_coding	-1	c.*3932_*3933insT
19	37960256	G	GT	PASS	downstream_gene_variant	MODIFIER	RAB3GAP1	476127	transcript	XM_533334.6	protein_coding	-1	c.*3249_*3250insT
19	37960256	G	GT	PASS	downstream_gene_variant	MODIFIER	RAB3GAP1	476127	transcript	XM_005631944.3	protein_coding	-1	c.*3249_*3250insT
19	37960256	G	GT	PASS	intron_variant	MODIFIER	RAB3GAP1	476127	transcript	XR_002616414.1	pseudogene	23	n.2724-3043_2724-3042insT
19	37960256	G	GT	PASS	intron_variant	MODIFIER	RAB3GAP1	476127	transcript	XM_022406114.1	protein_coding	23	c.2700+7624_2700+7625insT
19	37960256	G	GT	PASS	intron_variant	MODIFIER	RAB3GAP1	476127	transcript	XM_022406115.1	protein_coding	23	c.2700+7624_2700+7625insT
19	37960256	G	GT	PASS	intron_variant	MODIFIER	RAB3GAP1	476127	transcript	XR_002616408.1	pseudogene	23	n.2723+7624_2723+7625insT
19	37960256	G	GT	PASS	intron_variant	MODIFIER	RAB3GAP1	476127	transcript	XR_002616409.1	pseudogene	23	n.2723+7624_2723+7625insT
19	37960256	G	GT	PASS	intron_variant	MODIFIER	RAB3GAP1	476127	transcript	XR_002616410.1	pseudogene	23	n.2724-3043_2724-3042insT
19	37960256	G	GT	PASS	intron_variant	MODIFIER	RAB3GAP1	476127	transcript	XR_002616412.1	pseudogene	23	n.2724-3043_2724-3042insT
19	37960256	G	GT	PASS	intron_variant	MODIFIER	RAB3GAP1	476127	transcript	XR_002616413.1	pseudogene	23	n.2724-3043_2724-3042insT
19	37960256	G	GT	PASS	intron_variant	MODIFIER	RAB3GAP1	476127	transcript	XR_002616415.1	pseudogene	23	n.2724-3050_2724-3049insT
19	37960256	G	GT	PASS	intron_variant	MODIFIER	RAB3GAP1	476127	transcript	XR_002616416.1	pseudogene	23	n.2724-3050_2724-3049insT
19	38023444	G	T	PASS	intron_variant	MODIFIER	ZRANB3	476128	transcript	XM_005631946.3	protein_coding	14	c.2129-1925C>A
19	38023444	G	T	PASS	intron_variant	MODIFIER	ZRANB3	476128	transcript	XM_022406113.1	protein_coding	9	c.1370-1925C>A
19	38023444	G	T	PASS	intron_variant	MODIFIER	ZRANB3	476128	transcript	XM_022406111.1	protein_coding	14	c.2012-1925C>A
19	38023444	G	T	PASS	intron_variant	MODIFIER	ZRANB3	476128	transcript	XM_005631947.3	protein_coding	14	c.2129-1925C>A
19	38023444	G	T	PASS	intron_variant	MODIFIER	ZRANB3	476128	transcript	XM_022406112.1	protein_coding	14	c.2129-1925C>A
19	38258630	C	T	PASS	intron_variant	MODIFIER	ZRANB3	476128	transcript	XM_005631946.3	protein_coding	2	c.164+16170G>A
19	38258630	C	T	PASS	intron_variant	MODIFIER	ZRANB3	476128	transcript	XM_022406111.1	protein_coding	2	c.164+16170G>A
19	38258630	C	T	PASS	intron_variant	MODIFIER	ZRANB3	476128	transcript	XM_005631947.3	protein_coding	2	c.164+16170G>A
19	38258630	C	T	PASS	intron_variant	MODIFIER	ZRANB3	476128	transcript	XM_022406112.1	protein_coding	2	c.164+16170G>A
19	38269596	C	T	PASS	intron_variant	MODIFIER	ZRANB3	476128	transcript	XM_005631946.3	protein_coding	2	c.164+5204G>A
19	38269596	C	T	PASS	intron_variant	MODIFIER	ZRANB3	476128	transcript	XM_022406111.1	protein_coding	2	c.164+5204G>A
19	38269596	C	T	PASS	intron_variant	MODIFIER	ZRANB3	476128	transcript	XM_005631947.3	protein_coding	2	c.164+5204G>A
19	38269596	C	T	PASS	intron_variant	MODIFIER	ZRANB3	476128	transcript	XM_022406112.1	protein_coding	2	c.164+5204G>A
19	38273749	T	G	PASS	intron_variant	MODIFIER	ZRANB3	476128	transcript	XM_005631946.3	protein_coding	2	c.164+1051A>C
19	38273749	T	G	PASS	intron_variant	MODIFIER	ZRANB3	476128	transcript	XM_022406111.1	protein_coding	2	c.164+1051A>C
19	38273749	T	G	PASS	intron_variant	MODIFIER	ZRANB3	476128	transcript	XM_005631947.3	protein_coding	2	c.164+1051A>C
19	38273749	T	G	PASS	intron_variant	MODIFIER	ZRANB3	476128	transcript	XM_022406112.1	protein_coding	2	c.164+1051A>C
19	38691268	C	T	GATKstd	intron_variant	MODIFIER	DARS	476132	transcript	XM_843573.5	protein_coding	15	c.1415-434G>A
19	38691268	C	T	GATKstd	intron_variant	MODIFIER	DARS	476132	transcript	XM_022406131.1	protein_coding	14	c.1355-434G>A
19	38775410	A	C	PASS	intron_variant	MODIFIER	LOC111091173	111091173	transcript	XR_002616421.1	pseudogene	2	n.376+3785A>C
19	38775410	A	C	PASS	intron_variant	MODIFIER	LOC111091173	111091173	transcript	XR_002616420.1	pseudogene	2	n.493-3113A>C
19	38843865	C	T	PASS	intergenic_region	MODIFIER	LOC111091173-CXCR4	111091173-483900	intergenic_region	111091173-483900		-1	n.38843865C>T
19	39524136	A	AT	PASS	intergenic_region	MODIFIER	LOC102154415-THSD7B	102154415-100684750	intergenic_region	102154415-100684750		-1	n.39524136_39524137insT
19	39558186	C	A	PASS	intergenic_region	MODIFIER	LOC102154415-THSD7B	102154415-100684750	intergenic_region	102154415-100684750		-1	n.39558186C>A
19	39940669	T	TC	PASS	intron_variant	MODIFIER	THSD7B	100684750	transcript	XM_014121529.2	protein_coding	8	c.2148-1535_2148-1534insC
19	40054484	A	G	GATKstd	intron_variant	MODIFIER	THSD7B	100684750	transcript	XM_014121529.2	protein_coding	11	c.2498-30934A>G
19	40054485	T	C	GATKstd	intron_variant	MODIFIER	THSD7B	100684750	transcript	XM_014121529.2	protein_coding	11	c.2498-30933T>C
19	40054494	C	T	GATKstd	intron_variant	MODIFIER	THSD7B	100684750	transcript	XM_014121529.2	protein_coding	11	c.2498-30924C>T
19	40054509	TGA	T	PASS	intron_variant	MODIFIER	THSD7B	100684750	transcript	XM_014121529.2	protein_coding	11	c.2498-30908_2498-30907delGA
19	40054512	C	CCT	PASS	intron_variant	MODIFIER	THSD7B	100684750	transcript	XM_014121529.2	protein_coding	11	c.2498-30906_2498-30905insCT
19	40054524	A	G	GATKstd	intron_variant	MODIFIER	THSD7B	100684750	transcript	XM_014121529.2	protein_coding	11	c.2498-30894A>G
19	41047187	C	A	GATKstd	intergenic_region	MODIFIER	HNMT-SPOPL	476133-476134	intergenic_region	476133-476134		-1	n.41047187C>A
19	41047188	A	C	GATKstd	intergenic_region	MODIFIER	HNMT-SPOPL	476133-476134	intergenic_region	476133-476134		-1	n.41047188A>C
2	16898961	T	TTCTTTCTTTCTTTCTTTCTTTCTTTCTTTCTTTCTTTCTTTCTTTCTTTC	PASS	intergenic_region	MODIFIER	LOC102157109-LOC487083	102157109-487083	intergenic_region	102157109-487083		-1	n.16898961_16898962insTCTTTCTTTCTTTCTTTCTTTCTTTCTTTCTTTCTTTCTTTCTTTCTTTC
2	25741078	T	A	PASS	intron_variant	MODIFIER	CELF2	607310	transcript	XM_022407922.1	protein_coding	1	c.-95+77113A>T
2	25741165	T	C	PASS	intron_variant	MODIFIER	CELF2	607310	transcript	XM_022407922.1	protein_coding	1	c.-95+77026A>G
2	34463575	A	C	PASS	intron_variant	MODIFIER	DIP2C	610591	transcript	XM_022414704.1	protein_coding	35	c.4268-408A>C
2	53226036	C	T	PASS	intergenic_region	MODIFIER	LOC111094657-LOC111092497	111094657-111092497	intergenic_region	111094657-111092497		-1	n.53226036C>T
2	75359810	A	T	PASS	intergenic_region	MODIFIER	LOC111093525-LOC100687018	111093525-100687018	intergenic_region	111093525-100687018		-1	n.75359810A>T
2	82458046	G	C	PASS	intron_variant	MODIFIER	KAZN	607338	transcript	XM_014111408.2	protein_coding	1	c.317-8713C>G
2	84995820	CTTTA	C	PASS	intron_variant	MODIFIER	TARDBP	478234	transcript	XM_005618006.3	protein_coding	2	c.239-844_239-841delTAAA
2	84995820	CTTTA	C	PASS	intron_variant	MODIFIER	TARDBP	478234	transcript	XR_291728.3	pseudogene	2	n.361-844_361-841delTAAA
20	5652398	G	T	PASS	intron_variant	MODIFIER	IFT122	476528	transcript	XM_533734.6	protein_coding	23	c.2886+1350C>A
20	5652398	G	T	PASS	intron_variant	MODIFIER	IFT122	476528	transcript	XM_005632131.3	protein_coding	22	c.2709+1350C>A
20	5652398	G	T	PASS	intron_variant	MODIFIER	IFT122	476528	transcript	XM_022406353.1	protein_coding	23	c.2436+1350C>A
20	5652398	G	T	PASS	intron_variant	MODIFIER	IFT122	476528	transcript	XM_005632130.3	protein_coding	22	c.2721+1350C>A
20	5652398	G	T	PASS	intron_variant	MODIFIER	IFT122	476528	transcript	XM_005632132.3	protein_coding	21	c.2691+1350C>A
20	21570935	GA	G	PASS	intergenic_region	MODIFIER	LOC102155943-MITF	102155943-415126	intergenic_region	102155943-415126		-1	n.21570936delA
20	22029219	G	GA	PASS	intergenic_region	MODIFIER	LOC102155999-FRMD4B	102155999-484693	intergenic_region	102155999-484693		-1	n.22029219_22029220insA
20	29215381	T	C	PASS	intron_variant	MODIFIER	PTPRG	484706	transcript	XM_003432852.3	protein_coding	2	c.190+88120A>G
20	29215381	T	C	PASS	intron_variant	MODIFIER	PTPRG	484706	transcript	XM_005632364.3	protein_coding	2	c.190+88120A>G
20	29215381	T	C	PASS	intron_variant	MODIFIER	PTPRG	484706	transcript	XM_541822.6	protein_coding	2	c.190+88120A>G
20	44766809	G	C	PASS	upstream_gene_variant	MODIFIER	PDE4C	609938	transcript	XM_014122345.2	protein_coding	-1	c.-835G>C
20	44766809	G	C	PASS	upstream_gene_variant	MODIFIER	PDE4C	609938	transcript	XM_014122346.2	protein_coding	-1	c.-835G>C
20	44766809	G	C	PASS	upstream_gene_variant	MODIFIER	PDE4C	609938	transcript	XM_022406866.1	protein_coding	-1	c.-835G>C
20	44766809	G	C	PASS	downstream_gene_variant	MODIFIER	LOC111091450	111091450	transcript	XR_002617046.1	pseudogene	-1	n.*1677G>C
20	44766809	G	C	PASS	intergenic_region	MODIFIER	LOC111091450-PDE4C	111091450-609938	intergenic_region	111091450-609938		-1	n.44766809G>C
20	48268878	G	GT	PASS	intergenic_region	MODIFIER	LOC111091367-ADGRL1	111091367-610349	intergenic_region	111091367-610349		-1	n.48268878_48268879insT
20	49118895	T	TG	PASS	downstream_gene_variant	MODIFIER	LYL1	610908	transcript	XM_022407375.1	protein_coding	-1	c.*5280_*5281insG
20	49118895	T	TG	PASS	intron_variant	MODIFIER	NFIX	484920	transcript	XM_022406983.1	protein_coding	11	c.1654-528_1654-527insC
20	49118895	T	TG	PASS	intron_variant	MODIFIER	NFIX	484920	transcript	XM_005632815.3	protein_coding	9	c.*21-528_*21-527insC
20	49118895	T	TG	PASS	intron_variant	MODIFIER	NFIX	484920	transcript	XM_003432914.4	protein_coding	10	c.1519-528_1519-527insC
20	49118895	T	TG	PASS	intron_variant	MODIFIER	NFIX	484920	transcript	XM_022406984.1	protein_coding	11	c.1606-528_1606-527insC
20	56974022	A	C	PASS	missense_variant	MODERATE	MKNK2	612212	transcript	XM_005633240.3	protein_coding	10	c.868A>C	p.Ile290Leu
20	57149877	G	GGGGC	PASS	intron_variant	MODIFIER	ATP8B3	612245	transcript	XM_022407396.1	protein_coding	7	c.1005+224_1005+225insGGGC
21	28003496	C	T	PASS	intergenic_region	MODIFIER	LOC100688540-LOC610350	100688540-610350	intergenic_region	100688540-610350		-1	n.28003496C>T
21	30369618	A	G	PASS	intergenic_region	MODIFIER	LOC100688871-LOC100688944	100688871-100688944	intergenic_region	100688871-100688944		-1	n.30369618A>G
21	35790198	A	C	PASS	intron_variant	MODIFIER	TEAD1	610713	transcript	XM_005633681.3	protein_coding	2	c.157+35593A>C
21	35790198	A	C	PASS	intron_variant	MODIFIER	TEAD1	610713	transcript	XM_005633682.3	protein_coding	2	c.157+35593A>C
21	35790198	A	C	PASS	intron_variant	MODIFIER	TEAD1	610713	transcript	XM_014122601.2	protein_coding	2	c.157+35593A>C
21	35790198	A	C	PASS	intron_variant	MODIFIER	TEAD1	610713	transcript	XM_014122602.2	protein_coding	2	c.157+35593A>C
21	35790198	A	C	PASS	intron_variant	MODIFIER	TEAD1	610713	transcript	XM_014122603.2	protein_coding	2	c.157+35593A>C
21	35790198	A	C	PASS	intron_variant	MODIFIER	TEAD1	610713	transcript	XM_014122604.2	protein_coding	2	c.157+35593A>C
21	39922665	C	G	PASS	downstream_gene_variant	MODIFIER	NUCB2	476876	transcript	XM_022407896.1	protein_coding	-1	c.*4113C>G
21	39922665	C	G	PASS	downstream_gene_variant	MODIFIER	NUCB2	476876	transcript	XM_022407898.1	protein_coding	-1	c.*4507C>G
21	39922665	C	G	PASS	downstream_gene_variant	MODIFIER	NUCB2	476876	transcript	XM_022407900.1	protein_coding	-1	c.*4507C>G
21	39922665	C	G	PASS	downstream_gene_variant	MODIFIER	NUCB2	476876	transcript	XM_022407897.1	protein_coding	-1	c.*4081C>G
21	39922665	C	G	PASS	downstream_gene_variant	MODIFIER	NUCB2	476876	transcript	XM_022407899.1	protein_coding	-1	c.*4113C>G
21	39922665	C	G	PASS	intergenic_region	MODIFIER	NUCB2-NCR3LG1	476876-102154898	intergenic_region	476876-102154898		-1	n.39922665C>G
21	41167820	A	T	PASS	intergenic_region	MODIFIER	LOC111091577-MRGPRX2	111091577-485410	intergenic_region	111091577-485410		-1	n.41167820A>T
21	41593326	A	G	PASS	intron_variant	MODIFIER	NAV2	485411	transcript	XM_014122561.2	protein_coding	1	c.75+134268A>G
21	41840816	C	A	PASS	intron_variant	MODIFIER	NAV2	485411	transcript	XM_005633751.3	protein_coding	1	c.258+56213C>A
21	41840816	C	A	PASS	intron_variant	MODIFIER	NAV2	485411	transcript	XM_014122561.2	protein_coding	1	c.76-63731C>A
21	41840816	C	A	PASS	intron_variant	MODIFIER	NAV2	485411	transcript	XM_005633753.3	protein_coding	1	c.258+56213C>A
21	41840816	C	A	PASS	intron_variant	MODIFIER	NAV2	485411	transcript	XM_005633752.3	protein_coding	1	c.258+56213C>A
21	41840816	C	A	PASS	intron_variant	MODIFIER	NAV2	485411	transcript	XM_005633754.3	protein_coding	1	c.258+56213C>A
21	41840816	C	A	PASS	intron_variant	MODIFIER	NAV2	485411	transcript	XM_005633755.3	protein_coding	1	c.258+56213C>A
21	41840816	C	A	PASS	intron_variant	MODIFIER	NAV2	485411	transcript	XM_003432936.4	protein_coding	1	c.258+56213C>A
21	41840816	C	A	PASS	intron_variant	MODIFIER	NAV2	485411	transcript	XM_542530.6	protein_coding	1	c.258+56213C>A
21	41981442	AG	A	PASS	intron_variant	MODIFIER	NAV2	485411	transcript	XM_005633751.3	protein_coding	7	c.997+17543delG
21	41981442	AG	A	PASS	intron_variant	MODIFIER	NAV2	485411	transcript	XM_014122561.2	protein_coding	7	c.814+17543delG
21	41981442	AG	A	PASS	intron_variant	MODIFIER	NAV2	485411	transcript	XM_005633753.3	protein_coding	7	c.997+17543delG
21	41981442	AG	A	PASS	intron_variant	MODIFIER	NAV2	485411	transcript	XM_005633752.3	protein_coding	7	c.997+17543delG
21	41981442	AG	A	PASS	intron_variant	MODIFIER	NAV2	485411	transcript	XM_005633754.3	protein_coding	7	c.997+17543delG
21	41981442	AG	A	PASS	intron_variant	MODIFIER	NAV2	485411	transcript	XM_005633755.3	protein_coding	7	c.997+17543delG
21	41981442	AG	A	PASS	intron_variant	MODIFIER	NAV2	485411	transcript	XM_003432936.4	protein_coding	6	c.928+17543delG
21	41981442	AG	A	PASS	intron_variant	MODIFIER	NAV2	485411	transcript	XM_542530.6	protein_coding	6	c.928+17543delG
21	42014658	C	T	PASS	intron_variant	MODIFIER	NAV2	485411	transcript	XM_005633751.3	protein_coding	9	c.2213-2674C>T
21	42014658	C	T	PASS	intron_variant	MODIFIER	NAV2	485411	transcript	XM_014122561.2	protein_coding	9	c.2030-2674C>T
21	42014658	C	T	PASS	intron_variant	MODIFIER	NAV2	485411	transcript	XM_005633753.3	protein_coding	9	c.2213-2674C>T
21	42014658	C	T	PASS	intron_variant	MODIFIER	NAV2	485411	transcript	XM_005633752.3	protein_coding	9	c.2213-2674C>T
21	42014658	C	T	PASS	intron_variant	MODIFIER	NAV2	485411	transcript	XM_005633754.3	protein_coding	9	c.2213-2674C>T
21	42014658	C	T	PASS	intron_variant	MODIFIER	NAV2	485411	transcript	XM_005633755.3	protein_coding	9	c.2213-2674C>T
21	42014658	C	T	PASS	intron_variant	MODIFIER	NAV2	485411	transcript	XM_003432936.4	protein_coding	8	c.2144-2674C>T
21	42014658	C	T	PASS	intron_variant	MODIFIER	NAV2	485411	transcript	XM_542530.6	protein_coding	8	c.2144-2674C>T
21	42014658	C	T	PASS	intron_variant	MODIFIER	NAV2	485411	transcript	XM_022407936.1	protein_coding	3	c.1181-2674C>T
21	42508065	T	A	PASS	intron_variant	MODIFIER	PRMT3	476887	transcript	XM_534089.5	protein_coding	13	c.1378-6348T>A
21	42508065	T	A	PASS	intron_variant	MODIFIER	PRMT3	476887	transcript	XM_022407938.1	protein_coding	12	c.1117-6348T>A
21	42508065	T	A	PASS	intron_variant	MODIFIER	PRMT3	476887	transcript	XM_022407939.1	protein_coding	11	c.1162-6348T>A
21	42700203	C	T	GATKstd	downstream_gene_variant	MODIFIER	LOC100686726	100686726	transcript	100686726	pseudogene	-1	n.*3936G>A
21	42700203	C	T	GATKstd	intron_variant	MODIFIER	NELL1	476888	transcript	XM_022407972.1	protein_coding	4	c.665-30314C>T
21	42797018	G	A	PASS	intron_variant	MODIFIER	NELL1	476888	transcript	XM_022407972.1	protein_coding	6	c.987-10550G>A
21	43024485	C	CT	PASS	intron_variant	MODIFIER	NELL1	476888	transcript	XM_022407972.1	protein_coding	14	c.1781-17638_1781-17637insT
21	43024503	TTC	T	PASS	intron_variant	MODIFIER	NELL1	476888	transcript	XM_022407972.1	protein_coding	14	c.1781-17619_1781-17618delTC
21	43794148	G	A	PASS	intergenic_region	MODIFIER	NELL1-LOC111091580	476888-111091580	intergenic_region	476888-111091580		-1	n.43794148G>A
21	50142413	A	G	PASS	intergenic_region	MODIFIER	KCNA4-LOC111091619	485427-111091619	intergenic_region	485427-111091619		-1	n.50142413A>G
21	50744072	G	A	PASS	intergenic_region	MODIFIER	MS4A1-MIR8813-1	485430-104796984	intergenic_region	485430-104796984		-1	n.50744072G>A
22	6884436	C	G	PASS	intron_variant	MODIFIER	LACC1	476928	transcript	XR_002617931.1	pseudogene	11	n.2264-16932G>C
22	6884436	C	G	PASS	intron_variant	MODIFIER	LACC1	476928	transcript	XR_002617932.1	pseudogene	9	n.1708-16932G>C
22	6884436	C	G	PASS	intron_variant	MODIFIER	LACC1	476928	transcript	XR_002617934.1	pseudogene	10	n.2116-16932G>C
22	6884437	GATACACGAC	G	PASS	intron_variant	MODIFIER	LACC1	476928	transcript	XR_002617931.1	pseudogene	11	n.2264-16942_2264-16934delGTCGTGTAT
22	6884437	GATACACGAC	G	PASS	intron_variant	MODIFIER	LACC1	476928	transcript	XR_002617932.1	pseudogene	9	n.1708-16942_1708-16934delGTCGTGTAT
22	6884437	GATACACGAC	G	PASS	intron_variant	MODIFIER	LACC1	476928	transcript	XR_002617934.1	pseudogene	10	n.2116-16942_2116-16934delGTCGTGTAT
22	29709554	A	T	PASS	intergenic_region	MODIFIER	LMO7-LOC111091800	476948-111091800	intergenic_region	476948-111091800		-1	n.29709554A>T
22	49449102	A	AAG	PASS	intergenic_region	MODIFIER	UBAC2-TM9SF2	608309-476972	intergenic_region	608309-476972		-1	n.49449102_49449103insAG
22	53141768	TTTCTC	T	PASS	intergenic_region	MODIFIER	LOC111091808-LOC100683553	111091808-100683553	intergenic_region	111091808-100683553		-1	n.53141769_53141773delTTCTC
22	54901633	C	CAT	PASS	intergenic_region	MODIFIER	LOC111091642-LOC100683697	111091642-100683697	intergenic_region	111091642-100683697		-1	n.54901633_54901634insAT
22	55036393	G	A	PASS	intron_variant	MODIFIER	LOC111091706	111091706	transcript	XR_002617656.1	pseudogene	1	n.1385+5941C>T
22	55046495	G	A	GATKstd	upstream_gene_variant	MODIFIER	LOC111091706	111091706	transcript	XR_002617656.1	pseudogene	-1	n.-2777C>T
22	55046495	G	A	GATKstd	intergenic_region	MODIFIER	LOC111091706-LOC111091707	111091706-111091707	intergenic_region	111091706-111091707		-1	n.55046495G>A
22	55100056	G	A	GATKstd	intergenic_region	MODIFIER	LOC111091706-LOC111091707	111091706-111091707	intergenic_region	111091706-111091707		-1	n.55100056G>A
22	55121787	C	T	GATKstd	intron_variant	MODIFIER	LOC111091707	111091707	transcript	XR_002617659.1	pseudogene	2	n.347-8123G>A
22	55121787	C	T	GATKstd	intron_variant	MODIFIER	LOC111091707	111091707	transcript	XR_002617658.1	pseudogene	2	n.238-8123G>A
22	55121787	C	T	GATKstd	intron_variant	MODIFIER	LOC111091707	111091707	transcript	XR_002617661.1	pseudogene	1	n.65-8123G>A
22	55121787	C	T	GATKstd	intron_variant	MODIFIER	LOC111091707	111091707	transcript	XR_002617660.1	pseudogene	1	n.262-8123G>A
22	55121787	C	T	GATKstd	intron_variant	MODIFIER	LOC111091707	111091707	transcript	XR_002617662.1	pseudogene	2	n.156-8123G>A
22	55717844	G	A	GATKstd	intron_variant	MODIFIER	LOC111091708	111091708	transcript	XM_022408147.1	protein_coding	3	c.372-558G>A
22	55717844	G	A	GATKstd	intron_variant	MODIFIER	LOC111091708	111091708	transcript	XM_022408148.1	protein_coding	4	c.345-558G>A
22	56602627	A	AAAGAAAGAAAGAAAGAAAG	PASS	intron_variant	MODIFIER	FAM155A	100688758	transcript	XM_022408224.1	protein_coding	1	c.900+153085_900+153086insCTTTCTTTCTTTCTTTCTT
23	16844596	T	A	PASS	intron_variant	MODIFIER	NEK10	485638	transcript	XM_005634341.2	protein_coding	11	c.804-699T>A
23	16844596	T	A	PASS	intron_variant	MODIFIER	NEK10	485638	transcript	XM_542757.7	protein_coding	11	c.804-699T>A
23	16844596	T	A	PASS	intron_variant	MODIFIER	NEK10	485638	transcript	XR_002618108.1	pseudogene	11	n.996-699T>A
23	16844596	T	A	PASS	intron_variant	MODIFIER	NEK10	485638	transcript	XM_005634342.2	protein_coding	11	c.804-699T>A
23	16844596	T	A	PASS	intron_variant	MODIFIER	NEK10	485638	transcript	XM_005634344.2	protein_coding	11	c.804-699T>A
23	16844596	T	A	PASS	intron_variant	MODIFIER	NEK10	485638	transcript	XM_022408563.1	protein_coding	9	c.552-699T>A
23	16844596	T	A	PASS	intron_variant	MODIFIER	NEK10	485638	transcript	XM_005634345.2	protein_coding	6	c.312-699T>A
23	30491594	A	T	PASS	upstream_gene_variant	MODIFIER	LOC100685681	100685681	transcript	100685681	pseudogene	-1	n.-4929A>T
23	30491594	A	T	PASS	intergenic_region	MODIFIER	CDV3-LOC100685681	100685602-100685681	intergenic_region	100685602-100685681		-1	n.30491594A>T
23	39212347	C	T	PASS	intron_variant	MODIFIER	SLC9A9	611417	transcript	XM_849086.5	protein_coding	6	c.649+3255G>A
23	39212347	C	T	PASS	intron_variant	MODIFIER	SLC9A9	611417	transcript	XM_022408719.1	protein_coding	5	c.466+3255G>A
23	39212347	C	T	PASS	intron_variant	MODIFIER	SLC9A9	611417	transcript	XM_022408721.1	protein_coding	5	c.466+3255G>A
23	39212347	C	T	PASS	intron_variant	MODIFIER	SLC9A9	611417	transcript	XM_022408718.1	protein_coding	6	c.466+3255G>A
23	39212347	C	T	PASS	intron_variant	MODIFIER	SLC9A9	611417	transcript	XM_022408717.1	protein_coding	6	c.466+3255G>A
23	39212347	C	T	PASS	intron_variant	MODIFIER	SLC9A9	611417	transcript	XM_022408720.1	protein_coding	6	c.466+3255G>A
23	39212347	C	T	PASS	intron_variant	MODIFIER	SLC9A9	611417	transcript	XM_022408716.1	protein_coding	6	c.466+3255G>A
23	39214500	C	T	PASS	intron_variant	MODIFIER	SLC9A9	611417	transcript	XM_849086.5	protein_coding	6	c.649+1102G>A
23	39214500	C	T	PASS	intron_variant	MODIFIER	SLC9A9	611417	transcript	XM_022408719.1	protein_coding	5	c.466+1102G>A
23	39214500	C	T	PASS	intron_variant	MODIFIER	SLC9A9	611417	transcript	XM_022408721.1	protein_coding	5	c.466+1102G>A
23	39214500	C	T	PASS	intron_variant	MODIFIER	SLC9A9	611417	transcript	XM_022408718.1	protein_coding	6	c.466+1102G>A
23	39214500	C	T	PASS	intron_variant	MODIFIER	SLC9A9	611417	transcript	XM_022408717.1	protein_coding	6	c.466+1102G>A
23	39214500	C	T	PASS	intron_variant	MODIFIER	SLC9A9	611417	transcript	XM_022408720.1	protein_coding	6	c.466+1102G>A
23	39214500	C	T	PASS	intron_variant	MODIFIER	SLC9A9	611417	transcript	XM_022408716.1	protein_coding	6	c.466+1102G>A
23	39413520	C	T	PASS	intron_variant	MODIFIER	SLC9A9	611417	transcript	XM_022408718.1	protein_coding	2	c.-9+52827G>A
23	39413520	C	T	PASS	intron_variant	MODIFIER	SLC9A9	611417	transcript	XM_022408717.1	protein_coding	2	c.-9+52827G>A
23	39413520	C	T	PASS	intron_variant	MODIFIER	SLC9A9	611417	transcript	XM_022408720.1	protein_coding	2	c.-9+52827G>A
23	39413520	C	T	PASS	intron_variant	MODIFIER	SLC9A9	611417	transcript	XM_022408716.1	protein_coding	2	c.-9+52827G>A
23	39915888	C	T	PASS	intergenic_region	MODIFIER	LOC111091973-LOC477105	111091973-477105	intergenic_region	111091973-477105		-1	n.39915888C>T
23	39942328	G	A	PASS	intergenic_region	MODIFIER	LOC111091973-LOC477105	111091973-477105	intergenic_region	111091973-477105		-1	n.39942328G>A
23	39977228	C	T	PASS	intergenic_region	MODIFIER	LOC111091973-LOC477105	111091973-477105	intergenic_region	111091973-477105		-1	n.39977228C>T
23	40005308	G	A	PASS	intergenic_region	MODIFIER	LOC111091973-LOC477105	111091973-477105	intergenic_region	111091973-477105		-1	n.40005308G>A
23	40122114	A	T	PASS	intergenic_region	MODIFIER	LOC111091973-LOC477105	111091973-477105	intergenic_region	111091973-477105		-1	n.40122114A>T
23	40551137	AATACTACAC	A	PASS	intergenic_region	MODIFIER	LOC111091885-LOC100688646	111091885-100688646	intergenic_region	111091885-100688646		-1	n.40551138_40551146delATACTACAC
23	41413457	CTCTTT	C	PASS	downstream_gene_variant	MODIFIER	LOC111091977	111091977	transcript	XR_002618297.1	pseudogene	-1	n.*4134_*4138delTCTTT
23	41413457	CTCTTT	C	PASS	downstream_gene_variant	MODIFIER	PLSCR4	611495	transcript	XM_005634546.3	protein_coding	-1	c.*1742_*1746delAAAGA
23	41413457	CTCTTT	C	PASS	downstream_gene_variant	MODIFIER	PLSCR4	611495	transcript	XM_022408723.1	protein_coding	-1	c.*1742_*1746delAAAGA
23	41413457	CTCTTT	C	PASS	downstream_gene_variant	MODIFIER	PLSCR4	611495	transcript	XM_005634548.3	protein_coding	-1	c.*1742_*1746delAAAGA
23	41413457	CTCTTT	C	PASS	intergenic_region	MODIFIER	LOC111091977-PLSCR4	111091977-611495	intergenic_region	111091977-611495		-1	n.41413458_41413462delTCTTT
23	41682237	T	G	PASS	intergenic_region	MODIFIER	LOC611500-LOC611511	611500-611511	intergenic_region	611500-611511		-1	n.41682237T>G
23	45898247	T	TGCACCG	PASS	downstream_gene_variant	MODIFIER	P2RY13	102155830	transcript	XM_005634568.3	protein_coding	-1	c.*2235_*2236insCGGTGC
23	45898247	T	TGCACCG	PASS	downstream_gene_variant	MODIFIER	P2RY13	102155830	transcript	XM_005634569.2	protein_coding	-1	c.*2235_*2236insCGGTGC
23	45898247	T	TGCACCG	PASS	intron_variant	MODIFIER	MED12L	100683791	transcript	XM_005634655.2	protein_coding	15	c.2272-22956_2272-22955insGCACCG
23	46636188	ATCT	A	PASS	intergenic_region	MODIFIER	LOC100684084-MBNL1	100684084-477116	intergenic_region	100684084-477116		-1	n.46636189_46636191delTCT
23	46636446	T	A	PASS	intergenic_region	MODIFIER	LOC100684084-MBNL1	100684084-477116	intergenic_region	100684084-477116		-1	n.46636446T>A
23	46636540	T	G	PASS	intergenic_region	MODIFIER	LOC100684084-MBNL1	100684084-477116	intergenic_region	100684084-477116		-1	n.46636540T>G
23	46708533	TGC	T	PASS	intron_variant	MODIFIER	MBNL1	477116	transcript	XM_022408751.1	protein_coding	1	c.-966+10761_-966+10762delGC
23	46708533	TGC	T	PASS	intron_variant	MODIFIER	MBNL1	477116	transcript	XM_022408763.1	protein_coding	1	c.-240+10761_-240+10762delGC
23	46708533	TGC	T	PASS	intron_variant	MODIFIER	MBNL1	477116	transcript	XM_022408764.1	protein_coding	1	c.-228+10761_-228+10762delGC
23	49956986	C	CTCAGCTGGAGTCCGAGCCCACTGGGGACTTTCCAGCAAGCCCCGTGCTCTCCCATCAGCTCTCAGCTATT	PASS	intron_variant	MODIFIER	KCNAB1	612006	transcript	XM_022408781.1	protein_coding	1	c.276-75432_276-75431insTCAGCTGGAGTCCGAGCCCACTGGGGACTTTCCAGCAAGCCCCGTGCTCTCCCATCAGCTCTCAGCTATT
23	49956986	C	CTCAGCTGGAGTCCGAGCCCACTGGGGACTTTCCAGCAAGCCCCGTGCTCTCCCATCAGCTCTCAGCTATT	PASS	intron_variant	MODIFIER	KCNAB1	612006	transcript	XM_003433171.4	protein_coding	1	c.243-75432_243-75431insTCAGCTGGAGTCCGAGCCCACTGGGGACTTTCCAGCAAGCCCCGTGCTCTCCCATCAGCTCTCAGCTATT
23	49956986	C	CTCAGCTGGAGTCCGAGCCCACTGGGGACTTTCCAGCAAGCCCCGTGCTCTCCCATCAGCTCTCAGCTATT	PASS	intron_variant	MODIFIER	KCNAB1	612006	transcript	XM_014106570.2	protein_coding	1	c.221+53341_221+53342insTCAGCTGGAGTCCGAGCCCACTGGGGACTTTCCAGCAAGCCCCGTGCTCTCCCATCAGCTCTCAGCTATT
23	51027764	C	G	PASS	intergenic_region	MODIFIER	VEPH1-LOC102154265	485731-102154265	intergenic_region	485731-102154265		-1	n.51027764C>G
23	51381628	C	T	GATKstd	downstream_gene_variant	MODIFIER	LOC111092018	111092018	transcript	XR_002618399.1	pseudogene	-1	n.*3720C>T
23	51381628	C	T	GATKstd	intergenic_region	MODIFIER	LOC111092018-SHOX2	111092018-485732	intergenic_region	111092018-485732		-1	n.51381628C>T
24	11236420	T	G	PASS	intergenic_region	MODIFIER	LOC106557727-LOC106557729	106557727-106557729	intergenic_region	106557727-106557729		-1	n.11236420T>G
24	12722177	A	C	GATKstd	intergenic_region	MODIFIER	LAMP5-PLCB4	608500-477160	intergenic_region	608500-477160		-1	n.12722177A>C
24	13051936	C	T	PASS	intron_variant	MODIFIER	PLCB4	477160	transcript	XM_014107042.2	protein_coding	1	c.-73-43839G>A
24	13051936	C	T	PASS	intron_variant	MODIFIER	PLCB4	477160	transcript	XM_022409335.1	protein_coding	1	c.-74+13043G>A
24	13051936	C	T	PASS	intron_variant	MODIFIER	PLCB4	477160	transcript	XM_022409337.1	protein_coding	1	c.-213+13043G>A
24	13051936	C	T	PASS	intron_variant	MODIFIER	PLCB4	477160	transcript	XM_022409336.1	protein_coding	1	c.-73-43839G>A
24	13051936	C	T	PASS	intron_variant	MODIFIER	PLCB4	477160	transcript	XM_014107043.2	protein_coding	1	c.-212-43839G>A
24	29283400	C	G	PASS	upstream_gene_variant	MODIFIER	LOC111092095	111092095	transcript	XR_002618586.1	pseudogene	-1	n.-99C>G
24	29283400	C	G	PASS	intron_variant	MODIFIER	ZHX3	485875	transcript	XM_005635064.3	protein_coding	1	c.-270-1229G>C
24	29283400	C	G	PASS	intron_variant	MODIFIER	ZHX3	485875	transcript	XM_022409122.1	protein_coding	1	c.-181-1229G>C
24	29283400	C	G	PASS	intron_variant	MODIFIER	ZHX3	485875	transcript	XR_295484.3	pseudogene	1	n.81-1229G>C
24	29283400	C	G	PASS	intron_variant	MODIFIER	ZHX3	485875	transcript	XM_005635065.2	protein_coding	1	c.-270-1229G>C
24	29283400	C	G	PASS	intron_variant	MODIFIER	ZHX3	485875	transcript	XM_005635069.2	protein_coding	1	c.-153+37129G>C
24	29283400	C	G	PASS	intron_variant	MODIFIER	ZHX3	485875	transcript	XM_005635066.3	protein_coding	1	c.-270-1229G>C
24	29428264	GA	G	PASS	intron_variant	MODIFIER	CHD6	477230	transcript	XM_014107014.2	protein_coding	28	c.4068+5853delT
24	29428264	GA	G	PASS	intron_variant	MODIFIER	CHD6	477230	transcript	XM_005635070.3	protein_coding	29	c.4062+5853delT
24	29428264	GA	G	PASS	intron_variant	MODIFIER	CHD6	477230	transcript	XM_014107015.2	protein_coding	27	c.4068+5853delT
24	29428264	GA	G	PASS	intron_variant	MODIFIER	CHD6	477230	transcript	XM_014107017.2	protein_coding	28	c.4068+5853delT
24	45352297	GAA	G	PASS	intron_variant	MODIFIER	AR	403588_circ	transcript	NM_001003053.1_circ	protein_coding	3	c.869-6617488_869-6617487delAA
24	45352297	GAA	G	PASS	intron_variant	MODIFIER	LOC102154319	102154319	transcript	XR_295524.3	pseudogene	1	n.212-5259_212-5258delTT
25	15065553	A	AC	PASS	intron_variant	MODIFIER	TNFRSF19	486042	transcript	XM_022409775.1	protein_coding	1	c.-291-9264_-291-9263insG
25	15065553	A	AC	PASS	intron_variant	MODIFIER	TNFRSF19	486042	transcript	XM_543168.6	protein_coding	1	c.-37+9647_-37+9648insG
25	23581331	C	T	PASS	intron_variant	MODIFIER	GALNTL6	486063	transcript	XM_014107585.2	protein_coding	7	c.1353+1456C>T
25	23581331	C	T	PASS	intron_variant	MODIFIER	GALNTL6	486063	transcript	XM_022409821.1	protein_coding	8	c.1041+1456C>T
25	23581481	A	T	PASS	intron_variant	MODIFIER	GALNTL6	486063	transcript	XM_014107585.2	protein_coding	7	c.1353+1606A>T
25	23581481	A	T	PASS	intron_variant	MODIFIER	GALNTL6	486063	transcript	XM_022409821.1	protein_coding	8	c.1041+1606A>T
25	29655461	C	CAAGGGTGTATGGTACTTAAAGATGATAGATAGATAGATAATAGATAGAGCGAGCTCACCAAAAGTCTACTGATCAGTTGTCCTCCTCGTTGGTCAT	PASS	intron_variant	MODIFIER	SCARA5	486097	transcript	XM_005635672.3	protein_coding	3	c.242-9798_242-9797insAAGGGTGTATGGTACTTAAAGATGATAGATAGATAGATAATAGATAGAGCGAGCTCACCAAAAGTCTACTGATCAGTTGTCCTCCTCGTTGGTCAT
25	29655461	C	CAAGGGTGTATGGTACTTAAAGATGATAGATAGATAGATAATAGATAGAGCGAGCTCACCAAAAGTCTACTGATCAGTTGTCCTCCTCGTTGGTCAT	PASS	intron_variant	MODIFIER	LOC111092287	111092287	transcript	XR_002618993.1	pseudogene	2	n.678+921_678+922insATGACCAACGAGGAGGACAACTGATCAGTAGACTTTTGGTGAGCTCGCTCTATCTATTATCTATCTATCTATCATCTTTAAGTACCATACACCCTT
25	29655461	C	CAAGGGTGTATGGTACTTAAAGATGATAGATAGATAGATAATAGATAGAGCGAGCTCACCAAAAGTCTACTGATCAGTTGTCCTCCTCGTTGGTCAT	PASS	intron_variant	MODIFIER	SCARA5	486097	transcript	XM_543223.6	protein_coding	3	c.242-9798_242-9797insAAGGGTGTATGGTACTTAAAGATGATAGATAGATAGATAATAGATAGAGCGAGCTCACCAAAAGTCTACTGATCAGTTGTCCTCCTCGTTGGTCAT
25	31155761	A	G	PASS	upstream_gene_variant	MODIFIER	LOC111092378	111092378	transcript	XR_002619233.1	pseudogene	-1	n.-768A>G
25	31155761	A	G	PASS	intergenic_region	MODIFIER	BNIP3L-LOC111092378	608552-111092378	intergenic_region	608552-111092378		-1	n.31155761A>G
25	46127646	CCCA	C	PASS	intron_variant	MODIFIER	SH3BP4	486172	transcript	XM_005635907.3	protein_coding	5	c.2476-2018_2476-2016delCCA
25	46127646	CCCA	C	PASS	intron_variant	MODIFIER	SH3BP4	486172	transcript	XM_543298.6	protein_coding	4	c.2476-2018_2476-2016delCCA
25	46127646	CCCA	C	PASS	intron_variant	MODIFIER	SH3BP4	486172	transcript	XM_022409727.1	protein_coding	4	c.2476-2018_2476-2016delCCA
25	49989424	G	C	PASS	stop_gained	HIGH	LOC100856687	100856687	transcript	XM_003639890.1	protein_coding	1	c.654C>G	p.Tyr218*
25	49989425	T	A	PASS	missense_variant	MODERATE	LOC100856687	100856687	transcript	XM_003639890.1	protein_coding	1	c.653A>T	p.Tyr218Phe
25	50707046	A	C	PASS	downstream_gene_variant	MODIFIER	LOC106557798	106557798	transcript	XR_001314537.2	pseudogene	-1	n.*4573T>G
25	50707046	A	C	PASS	intron_variant	MODIFIER	LOC100855802	100855802	transcript	XM_022409756.1	protein_coding	1	c.818-133262A>C
25	50740281	A	C	PASS	upstream_gene_variant	MODIFIER	LOC609000	609000	transcript	XM_846178.4	protein_coding	-1	c.-1948T>G
25	50740281	A	C	PASS	intron_variant	MODIFIER	LOC100855802	100855802	transcript	XM_022409756.1	protein_coding	1	c.818-100027A>C
25	51015017	G	A	PASS	intron_variant	MODIFIER	CROCC2	102152385	transcript	XM_022409810.1	protein_coding	11	c.1375-28G>A
25	51015019	C	T	PASS	intron_variant	MODIFIER	CROCC2	102152385	transcript	XM_022409810.1	protein_coding	11	c.1375-26C>T
26	8166033	T	A	PASS	intron_variant	MODIFIER	ATP2A2	403878	transcript	NM_001003214.1	protein_coding	5	c.463+4614T>A
26	8166033	T	A	PASS	intron_variant	MODIFIER	ATP2A2	403878	transcript	XR_002619489.1	pseudogene	4	n.1026+4614T>A
26	8166033	T	A	PASS	intron_variant	MODIFIER	ATP2A2	403878	transcript	XR_295678.3	pseudogene	5	n.1043+4614T>A
26	8319568	C	T	PASS	intron_variant	MODIFIER	RAD9B	100855506	transcript	XM_022410797.1	protein_coding	4	c.578-2465C>T
26	9248710	G	A	PASS	upstream_gene_variant	MODIFIER	ACAD10	486272	transcript	XM_005636239.3	protein_coding	-1	c.-6830G>A
26	9248710	G	A	PASS	upstream_gene_variant	MODIFIER	ACAD10	486272	transcript	XM_005636240.2	protein_coding	-1	c.-6830G>A
26	9248710	G	A	PASS	upstream_gene_variant	MODIFIER	ACAD10	486272	transcript	XM_005636244.2	protein_coding	-1	c.-11278G>A
26	9248710	G	A	PASS	upstream_gene_variant	MODIFIER	ACAD10	486272	transcript	XM_005636241.2	protein_coding	-1	c.-6830G>A
26	9248710	G	A	PASS	upstream_gene_variant	MODIFIER	ACAD10	486272	transcript	XM_022410434.1	protein_coding	-1	c.-6830G>A
26	9248710	G	A	PASS	upstream_gene_variant	MODIFIER	ACAD10	486272	transcript	XM_005636243.3	protein_coding	-1	c.-6830G>A
26	9248710	G	A	PASS	upstream_gene_variant	MODIFIER	ACAD10	486272	transcript	XM_014108095.2	protein_coding	-1	c.-6830G>A
26	9248710	G	A	PASS	upstream_gene_variant	MODIFIER	ACAD10	486272	transcript	XM_005636242.3	protein_coding	-1	c.-6830G>A
26	9248710	G	A	PASS	intron_variant	MODIFIER	BRAP	486271	transcript	XM_543397.6	protein_coding	1	c.83-399C>T
26	9248710	G	A	PASS	intron_variant	MODIFIER	BRAP	486271	transcript	XM_005636238.3	protein_coding	1	c.83-399C>T
26	9248710	G	A	PASS	intron_variant	MODIFIER	BRAP	486271	transcript	XM_022410291.1	protein_coding	1	c.83-399C>T
26	9248710	G	A	PASS	intron_variant	MODIFIER	BRAP	486271	transcript	XM_014108029.2	protein_coding	1	c.83-399C>T
26	9248710	G	A	PASS	intron_variant	MODIFIER	BRAP	486271	transcript	XM_022410290.1	protein_coding	1	c.83-399C>T
26	9770662	C	T	PASS	intron_variant	MODIFIER	HECTD4	477486	transcript	XM_014107816.2	protein_coding	73	c.12531+519G>A
26	9803164	G	A	PASS	intron_variant	MODIFIER	HECTD4	477486	transcript	XM_014107816.2	protein_coding	53	c.8128+1334C>T
26	10223989	A	T	PASS	intron_variant	MODIFIER	RPH3A	611038	transcript	XM_022410377.1	protein_coding	1	c.-129-57102A>T
26	10223989	A	T	PASS	intron_variant	MODIFIER	RPH3A	611038	transcript	XM_022410376.1	protein_coding	1	c.-130+2294A>T
26	10223989	A	T	PASS	intron_variant	MODIFIER	RPH3A	611038	transcript	XM_022410378.1	protein_coding	1	c.-19+2294A>T
26	10479805	G	T	PASS	intron_variant	MODIFIER	DTX1	486276	transcript	XM_003639899.4	protein_coding	2	c.259+8266G>T
26	10479805	G	T	PASS	non_coding_transcript_exon_variant	MODIFIER	LOC111092704	111092704	transcript	XR_002619908.1	pseudogene	1	n.7801C>A
26	10479805	G	T	PASS	non_coding_transcript_exon_variant	MODIFIER	LOC111092704	111092704	transcript	XR_002619909.1	pseudogene	2	n.7106C>A
26	10514757	C	A	PASS	missense_variant	MODERATE	RASAL1	486277	transcript	XM_022410813.1	protein_coding	12	c.1174G>T	p.Gly392Cys
26	10514757	C	A	PASS	missense_variant	MODERATE	RASAL1	486277	transcript	XM_014107928.2	protein_coding	12	c.1147G>T	p.Gly383Cys
26	10514757	C	A	PASS	missense_variant	MODERATE	RASAL1	486277	transcript	XM_022410814.1	protein_coding	12	c.1174G>T	p.Gly392Cys
26	10873152	A	C	PASS	intergenic_region	MODIFIER	LOC111092662-LOC111092649	111092662-111092649	intergenic_region	111092662-111092649		-1	n.10873152A>C
26	11054014	C	T	PASS	intron_variant	MODIFIER	RBM19	486284	transcript	XM_005636269.3	protein_coding	23	c.2786-5900G>A
26	11106927	T	TACACAC	PASS	intron_variant	MODIFIER	RBM19	486284	transcript	XM_005636269.3	protein_coding	21	c.2558+17090_2558+17091insGTGTGT
26	11187901	A	C	PASS	intergenic_region	MODIFIER	RBM19-LOC100684109	486284-100684109	intergenic_region	486284-100684109		-1	n.11187901A>C
26	11487656	C	T	PASS	downstream_gene_variant	MODIFIER	LOC111092531	111092531	transcript	XR_002619568.1	pseudogene	-1	n.*1878C>T
26	11487656	C	T	PASS	downstream_gene_variant	MODIFIER	LOC111092531	111092531	transcript	XR_002619567.1	pseudogene	-1	n.*1878C>T
26	11487656	C	T	PASS	intron_variant	MODIFIER	TBX5	491447	transcript	XM_014108044.2	protein_coding	6	c.755+2254G>A
26	11487656	C	T	PASS	intron_variant	MODIFIER	TBX5	491447	transcript	XM_014108050.2	protein_coding	6	c.605+2254G>A
26	11487656	C	T	PASS	intron_variant	MODIFIER	TBX5	491447	transcript	XM_014108048.2	protein_coding	7	c.755+2254G>A
26	11487656	C	T	PASS	intron_variant	MODIFIER	TBX5	491447	transcript	XM_022410324.1	protein_coding	7	c.755+2254G>A
26	11487656	C	T	PASS	intron_variant	MODIFIER	TBX5	491447	transcript	XM_022410323.1	protein_coding	7	c.755+2254G>A
26	11487656	C	T	PASS	intron_variant	MODIFIER	TBX5	491447	transcript	XM_548568.6	protein_coding	7	c.755+2254G>A
26	11487656	C	T	PASS	intron_variant	MODIFIER	TBX5	491447	transcript	XM_014108046.2	protein_coding	8	c.755+2254G>A
26	11487656	C	T	PASS	intron_variant	MODIFIER	TBX5	491447	transcript	XM_014108047.2	protein_coding	7	c.755+2254G>A
26	11487656	C	T	PASS	intron_variant	MODIFIER	TBX5	491447	transcript	XM_014108049.2	protein_coding	7	c.755+2254G>A
26	15933206	T	TCACACAGAGA	PASS	intergenic_region	MODIFIER	CIT-BICDL1	100683247-100684686	intergenic_region	100683247-100684686		-1	n.15933206_15933207insCACACAGAGA
26	15933209	C	T	PASS	intergenic_region	MODIFIER	CIT-BICDL1	100683247-100684686	intergenic_region	100683247-100684686		-1	n.15933209C>T
26	22662780	G	C	PASS	intron_variant	MODIFIER	AP1B1	486344	transcript	XM_005636416.3	protein_coding	4	c.279+386C>G
26	22662780	G	C	PASS	intron_variant	MODIFIER	AP1B1	486344	transcript	XM_005636420.2	protein_coding	2	c.108+386C>G
26	22662780	G	C	PASS	intron_variant	MODIFIER	AP1B1	486344	transcript	XM_022410722.1	protein_coding	4	c.279+386C>G
26	22662780	G	C	PASS	intron_variant	MODIFIER	AP1B1	486344	transcript	XM_022410723.1	protein_coding	4	c.279+386C>G
26	22662780	G	C	PASS	intron_variant	MODIFIER	AP1B1	486344	transcript	XM_022410724.1	protein_coding	4	c.279+386C>G
26	22662780	G	C	PASS	intron_variant	MODIFIER	AP1B1	486344	transcript	XM_022410725.1	protein_coding	4	c.279+386C>G
26	22662780	G	C	PASS	intron_variant	MODIFIER	AP1B1	486344	transcript	XM_847105.5	protein_coding	4	c.279+386C>G
26	30233056	A	C	PASS	intron_variant	MODIFIER	SCARF2	100684936	transcript	XM_022410347.1	protein_coding	12	c.2973-487T>G
26	31470093	T	TTTCTTTC	PASS	intergenic_region	MODIFIER	LOC111092648-LOC608785	111092648-608785	intergenic_region	111092648-608785		-1	n.31470093_31470094insTTCTTTC
26	32860822	C	T	PASS	intergenic_region	MODIFIER	LOC111092511-LOC100686148	111092511-100686148	intergenic_region	111092511-100686148		-1	n.32860822C>T
26	38709075	TGGG	T	PASS	intron_variant	MODIFIER	ACTA2	477587	transcript	XM_534781.6	protein_coding	3	c.258+897_258+899delCCC
27	3792241	C	T	PASS	upstream_gene_variant	MODIFIER	SLC11A2	486543	transcript	XM_022410995.1	protein_coding	-1	c.-9131C>T
27	3792241	C	T	PASS	intron_variant	MODIFIER	SLC11A2	486543	transcript	XM_543669.5	protein_coding	1	c.46+3359C>T
27	3792241	C	T	PASS	intron_variant	MODIFIER	SLC11A2	486543	transcript	XM_005636831.3	protein_coding	1	c.-39+2109C>T
27	3792241	C	T	PASS	intron_variant	MODIFIER	SLC11A2	486543	transcript	XM_005636829.3	protein_coding	1	c.-39+1958C>T
27	3792241	C	T	PASS	intron_variant	MODIFIER	SLC11A2	486543	transcript	XM_005636830.3	protein_coding	1	c.-39+1573C>T
27	3792241	C	T	PASS	intron_variant	MODIFIER	SLC11A2	486543	transcript	XM_005636833.2	protein_coding	1	c.-39+1082C>T
27	9298122	A	AT	PASS	upstream_gene_variant	MODIFIER	NELL2	477636	transcript	XM_022411177.1	protein_coding	-1	c.-64010_-64009insT
27	9298122	A	AT	PASS	intergenic_region	MODIFIER	DBX2-NELL2	486598-477636	intergenic_region	486598-477636		-1	n.9298122_9298123insT
27	17653558	C	T	PASS	intergenic_region	MODIFIER	IPO8-LOC100685338	612863-100685338	intergenic_region	612863-100685338		-1	n.17653558C>T
27	17913655	C	G	GATKstd	intergenic_region	MODIFIER	LOC100685338-LOC111092883	100685338-111092883	intergenic_region	100685338-111092883		-1	n.17913655C>G
27	35394268	C	CT	PASS	intron_variant	MODIFIER	LOC611332	611332	transcript	XM_022411199.1	protein_coding	2	c.231+8268_231+8269insT
28	5468566	T	G	PASS	intron_variant	MODIFIER	HTR7	477762	transcript	XM_534958.6	protein_coding	1	c.546-21926A>C
28	5468566	T	G	PASS	intron_variant	MODIFIER	HTR7	477762	transcript	XM_005637529.3	protein_coding	1	c.546-21926A>C
28	6080611	C	A	PASS	intergenic_region	MODIFIER	HECTD2-LOC477765	486795-477765	intergenic_region	486795-477765		-1	n.6080611C>A
28	6821159	GCCTCC	G	PASS	upstream_gene_variant	MODIFIER	MIR8815-2	104794963	transcript	NR_128757.1	pseudogene	-1	n.-1722_-1718delGGAGG
28	6821159	GCCTCC	G	PASS	upstream_gene_variant	MODIFIER	MIR8815-2	104794963	transcript	TRANSCRIPT_104794963	pseudogene	-1	n.-1757_-1753delGGAGG
28	6821159	GCCTCC	G	PASS	downstream_gene_variant	MODIFIER	LOC102154273	102154273	transcript	XR_295949.3	pseudogene	-1	n.*779_*783delGGAGG
28	6821159	GCCTCC	G	PASS	downstream_gene_variant	MODIFIER	LOC102154273	102154273	transcript	XR_295948.3	pseudogene	-1	n.*779_*783delGGAGG
28	6821159	GCCTCC	G	PASS	intergenic_region	MODIFIER	MIR8815-2-LOC102154273	104794963-102154273	intergenic_region	104794963-102154273		-1	n.6821160_6821164delCCTCC
28	21797283	C	CTG	PASS	intron_variant	MODIFIER	LOC102156502	102156502	transcript	XR_002620555.1	pseudogene	3	n.3093-157_3093-156insCA
28	21797283	C	CTG	PASS	intron_variant	MODIFIER	LOC102156502	102156502	transcript	XR_002620556.1	pseudogene	3	n.3095-157_3095-156insCA
28	21797283	C	CTG	PASS	intron_variant	MODIFIER	LOC102156502	102156502	transcript	XR_002620552.1	pseudogene	3	n.3092-157_3092-156insCA
28	21797283	C	CTG	PASS	intron_variant	MODIFIER	LOC102156502	102156502	transcript	XR_002620558.1	pseudogene	2	n.3028-157_3028-156insCA
28	21797283	C	CTG	PASS	intron_variant	MODIFIER	LOC102156502	102156502	transcript	XR_002620554.1	pseudogene	4	n.3129-157_3129-156insCA
28	21797283	C	CTG	PASS	intron_variant	MODIFIER	LOC102156502	102156502	transcript	XR_002620557.1	pseudogene	4	n.2622-157_2622-156insCA
28	21797283	C	CTG	PASS	intron_variant	MODIFIER	LOC102156502	102156502	transcript	XR_295970.3	pseudogene	2	n.2946-157_2946-156insCA
28	21797283	C	CTG	PASS	intron_variant	MODIFIER	LOC102156502	102156502	transcript	XR_002620553.1	pseudogene	4	n.3243-157_3243-156insCA
28	21797283	C	CTG	PASS	intron_variant	MODIFIER	LOC102156502	102156502	transcript	XR_002620559.1	pseudogene	3	n.2983-157_2983-156insCA
28	40719593	G	A	PASS	upstream_gene_variant	MODIFIER	LOC102153476	102153476	transcript	XR_296016.3	pseudogene	-1	n.-2873C>T
28	40719593	G	A	PASS	downstream_gene_variant	MODIFIER	LOC111092984	111092984	transcript	XM_022411824.1	protein_coding	-1	c.*4342C>T
28	40719593	G	A	PASS	intergenic_region	MODIFIER	LOC102153476-LOC111092984	102153476-111092984	intergenic_region	102153476-111092984		-1	n.40719593G>A
28	40754123	C	T	PASS	upstream_gene_variant	MODIFIER	KNDC1	491411	transcript	XM_022411854.1	protein_coding	-1	c.-3987C>T
28	40754123	C	T	PASS	intergenic_region	MODIFIER	ADGRA1-KNDC1	491412-491411	intergenic_region	491412-491411		-1	n.40754123C>T
28	40756655	G	GC	PASS	upstream_gene_variant	MODIFIER	KNDC1	491411	transcript	XM_022411854.1	protein_coding	-1	c.-1455_-1454insC
28	40756655	G	GC	PASS	intergenic_region	MODIFIER	ADGRA1-KNDC1	491412-491411	intergenic_region	491412-491411		-1	n.40756655_40756656insC
28	40759479	G	C	PASS	intron_variant	MODIFIER	KNDC1	491411	transcript	XM_022411854.1	protein_coding	1	c.102+1268G>C
28	40762702	A	C	GATKstd	intron_variant	MODIFIER	KNDC1	491411	transcript	XM_022411854.1	protein_coding	1	c.103-1328A>C
28	40762964	ACTCC	A	PASS	intron_variant	MODIFIER	KNDC1	491411	transcript	XM_022411854.1	protein_coding	1	c.103-1065_103-1062delCTCC
28	40764365	C	T	GATKstd	intron_variant	MODIFIER	KNDC1	491411	transcript	XM_022411854.1	protein_coding	2	c.301+137C>T
28	40775117	G	A	GATKstd	intron_variant	MODIFIER	KNDC1	491411	transcript	XM_022411854.1	protein_coding	3	c.361-184G>A
28	40778568	C	T	PASS	intron_variant	MODIFIER	KNDC1	491411	transcript	XM_022411854.1	protein_coding	7	c.1260+831C>T
28	40783979	G	A	GATKstd	intron_variant	MODIFIER	KNDC1	491411	transcript	XM_022411854.1	protein_coding	10	c.1510-2247G>A
28	40784010	C	T	GATKstd	intron_variant	MODIFIER	KNDC1	491411	transcript	XM_022411854.1	protein_coding	10	c.1510-2216C>T
28	40787148	G	A	PASS	upstream_gene_variant	MODIFIER	LOC111092985	111092985	transcript	XM_022411825.1	protein_coding	-1	c.-4119G>A
28	40787148	G	A	PASS	intron_variant	MODIFIER	KNDC1	491411	transcript	XM_022411854.1	protein_coding	11	c.1669-139G>A
28	40788591	C	T	PASS	synonymous_variant	LOW	KNDC1	491411	transcript	XM_022411854.1	protein_coding	15	c.2007C>T	p.Asp669Asp
28	40788591	C	T	PASS	upstream_gene_variant	MODIFIER	LOC111092985	111092985	transcript	XM_022411825.1	protein_coding	-1	c.-2676C>T
28	40789718	G	A	PASS	upstream_gene_variant	MODIFIER	LOC111092985	111092985	transcript	XM_022411825.1	protein_coding	-1	c.-1549G>A
28	40789718	G	A	PASS	intron_variant	MODIFIER	KNDC1	491411	transcript	XM_022411854.1	protein_coding	16	c.*42+64G>A
28	40790569	C	T	PASS	3_prime_UTR_variant	MODIFIER	KNDC1	491411	transcript	XM_022411854.1	protein_coding	17	c.*110C>T
28	40790569	C	T	PASS	upstream_gene_variant	MODIFIER	LOC111092985	111092985	transcript	XM_022411825.1	protein_coding	-1	c.-698C>T
28	40791208	C	T	PASS	upstream_gene_variant	MODIFIER	LOC111092985	111092985	transcript	XM_022411825.1	protein_coding	-1	c.-59C>T
28	40791208	C	T	PASS	downstream_gene_variant	MODIFIER	KNDC1	491411	transcript	XM_022411854.1	protein_coding	-1	c.*1596C>T
28	40791208	C	T	PASS	intergenic_region	MODIFIER	KNDC1-LOC111092985	491411-111092985	intergenic_region	491411-111092985		-1	n.40791208C>T
28	40792155	G	A	PASS	downstream_gene_variant	MODIFIER	KNDC1	491411	transcript	XM_022411854.1	protein_coding	-1	c.*2543G>A
28	40792155	G	A	PASS	intron_variant	MODIFIER	LOC111092985	111092985	transcript	XM_022411825.1	protein_coding	1	c.432+457G>A
28	40792663	G	GCCCACA	PASS	downstream_gene_variant	MODIFIER	KNDC1	491411	transcript	XM_022411854.1	protein_coding	-1	c.*3051_*3052insCCCACA
28	40792663	G	GCCCACA	PASS	intron_variant	MODIFIER	LOC111092985	111092985	transcript	XM_022411825.1	protein_coding	1	c.432+965_432+966insCCCACA
28	40798783	C	T	PASS	intron_variant	MODIFIER	LOC111092985	111092985	transcript	XM_022411825.1	protein_coding	4	c.655-28C>T
28	40799143	G	T	PASS	intron_variant	MODIFIER	LOC111092985	111092985	transcript	XM_022411825.1	protein_coding	5	c.895+92G>T
28	40799183	G	A	PASS	intron_variant	MODIFIER	LOC111092985	111092985	transcript	XM_022411825.1	protein_coding	5	c.895+132G>A
28	40831535	C	T	PASS	intergenic_region	MODIFIER	LOC111092985-VENTX	111092985-100688982	intergenic_region	111092985-100688982		-1	n.40831535C>T
28	40831696	T	C	PASS	upstream_gene_variant	MODIFIER	VENTX	100688982	transcript	XM_003433650.2	protein_coding	-1	c.-4992T>C
28	40831696	T	C	PASS	intergenic_region	MODIFIER	LOC111092985-VENTX	111092985-100688982	intergenic_region	111092985-100688982		-1	n.40831696T>C
28	40831734	G	A	PASS	upstream_gene_variant	MODIFIER	VENTX	100688982	transcript	XM_003433650.2	protein_coding	-1	c.-4954G>A
28	40831734	G	A	PASS	intergenic_region	MODIFIER	LOC111092985-VENTX	111092985-100688982	intergenic_region	111092985-100688982		-1	n.40831734G>A
28	40831839	G	A	PASS	upstream_gene_variant	MODIFIER	VENTX	100688982	transcript	XM_003433650.2	protein_coding	-1	c.-4849G>A
28	40831839	G	A	PASS	intergenic_region	MODIFIER	LOC111092985-VENTX	111092985-100688982	intergenic_region	111092985-100688982		-1	n.40831839G>A
28	40831998	G	A	PASS	upstream_gene_variant	MODIFIER	VENTX	100688982	transcript	XM_003433650.2	protein_coding	-1	c.-4690G>A
28	40831998	G	A	PASS	intergenic_region	MODIFIER	LOC111092985-VENTX	111092985-100688982	intergenic_region	111092985-100688982		-1	n.40831998G>A
28	40832383	C	T	PASS	upstream_gene_variant	MODIFIER	VENTX	100688982	transcript	XM_003433650.2	protein_coding	-1	c.-4305C>T
28	40832383	C	T	PASS	intergenic_region	MODIFIER	LOC111092985-VENTX	111092985-100688982	intergenic_region	111092985-100688982		-1	n.40832383C>T
28	40832567	CCGCACGAG	C	PASS	upstream_gene_variant	MODIFIER	VENTX	100688982	transcript	XM_003433650.2	protein_coding	-1	c.-4120_-4113delCGCACGAG
28	40832567	CCGCACGAG	C	PASS	intergenic_region	MODIFIER	LOC111092985-VENTX	111092985-100688982	intergenic_region	111092985-100688982		-1	n.40832568_40832575delCGCACGAG
28	40833099	C	T	GATKstd	upstream_gene_variant	MODIFIER	VENTX	100688982	transcript	XM_003433650.2	protein_coding	-1	c.-3589C>T
28	40833099	C	T	GATKstd	intergenic_region	MODIFIER	LOC111092985-VENTX	111092985-100688982	intergenic_region	111092985-100688982		-1	n.40833099C>T
28	40834748	G	A	GATKstd	upstream_gene_variant	MODIFIER	VENTX	100688982	transcript	XM_003433650.2	protein_coding	-1	c.-1940G>A
28	40834748	G	A	GATKstd	intergenic_region	MODIFIER	LOC111092985-VENTX	111092985-100688982	intergenic_region	111092985-100688982		-1	n.40834748G>A
28	40834919	C	T	PASS	upstream_gene_variant	MODIFIER	VENTX	100688982	transcript	XM_003433650.2	protein_coding	-1	c.-1769C>T
28	40834919	C	T	PASS	intergenic_region	MODIFIER	LOC111092985-VENTX	111092985-100688982	intergenic_region	111092985-100688982		-1	n.40834919C>T
28	40835654	G	C	PASS	upstream_gene_variant	MODIFIER	VENTX	100688982	transcript	XM_003433650.2	protein_coding	-1	c.-1034G>C
28	40835654	G	C	PASS	intergenic_region	MODIFIER	LOC111092985-VENTX	111092985-100688982	intergenic_region	111092985-100688982		-1	n.40835654G>C
28	40836415	C	T	GATKstd	upstream_gene_variant	MODIFIER	VENTX	100688982	transcript	XM_003433650.2	protein_coding	-1	c.-273C>T
28	40836415	C	T	GATKstd	intergenic_region	MODIFIER	LOC111092985-VENTX	111092985-100688982	intergenic_region	111092985-100688982		-1	n.40836415C>T
28	40839773	T	C	PASS	missense_variant	MODERATE	VENTX	100688982	transcript	XM_003433650.2	protein_coding	3	c.773T>C	p.Phe258Ser
28	40839773	T	C	PASS	downstream_gene_variant	MODIFIER	MIR202	100885985	transcript	NR_049432.1	pseudogene	-1	n.*2303A>G
28	40839773	T	C	PASS	downstream_gene_variant	MODIFIER	MIR202	100885985	transcript	TRANSCRIPT_100885985	pseudogene	-1	n.*2344A>G
28	40839784	G	A	PASS	3_prime_UTR_variant	MODIFIER	VENTX	100688982	transcript	XM_003433650.2	protein_coding	3	c.*7G>A
28	40839784	G	A	PASS	downstream_gene_variant	MODIFIER	MIR202	100885985	transcript	NR_049432.1	pseudogene	-1	n.*2292C>T
28	40839784	G	A	PASS	downstream_gene_variant	MODIFIER	MIR202	100885985	transcript	TRANSCRIPT_100885985	pseudogene	-1	n.*2333C>T
29	504453	A	G	PASS	intergenic_region	MODIFIER	LOC100856084-LOC111093117	100856084-111093117	intergenic_region	100856084-111093117		-1	n.504453A>G
29	756932	T	G	PASS	intergenic_region	MODIFIER	LOC111093197-EFCAB1	111093197-477872	intergenic_region	111093197-477872		-1	n.756932T>G
29	2328954	G	T	PASS	intron_variant	MODIFIER	SNTG1	486943	transcript	XM_022412366.1	protein_coding	2	c.-25+45567G>T
29	2328954	G	T	PASS	intron_variant	MODIFIER	SNTG1	486943	transcript	XM_022412369.1	protein_coding	2	c.-25+45567G>T
29	2328954	G	T	PASS	intron_variant	MODIFIER	SNTG1	486943	transcript	XM_022412367.1	protein_coding	3	c.-25+45567G>T
29	2328954	G	T	PASS	intron_variant	MODIFIER	SNTG1	486943	transcript	XM_022412368.1	protein_coding	1	c.-24-194088G>T
29	2328954	G	T	PASS	intron_variant	MODIFIER	SNTG1	486943	transcript	XM_005637961.3	protein_coding	2	c.-25+45567G>T
29	9043812	TAAATAAAG	T	PASS	intron_variant	MODIFIER	LOC111093245	111093245	transcript	XR_002621139.1	pseudogene	4	n.4740+6928_4740+6935delAAATAAAG
29	9043812	TAAATAAAG	T	PASS	intron_variant	MODIFIER	LOC111093245	111093245	transcript	XR_002621140.1	pseudogene	4	n.4716+6928_4716+6935delAAATAAAG
29	9043822	TATTA	T	PASS	intron_variant	MODIFIER	LOC111093245	111093245	transcript	XR_002621139.1	pseudogene	4	n.4740+6938_4740+6941delATTA
29	9043822	TATTA	T	PASS	intron_variant	MODIFIER	LOC111093245	111093245	transcript	XR_002621140.1	pseudogene	4	n.4716+6938_4716+6941delATTA
29	9043829	TAA	T	PASS	intron_variant	MODIFIER	LOC111093245	111093245	transcript	XR_002621139.1	pseudogene	4	n.4740+6945_4740+6946delAA
29	9043829	TAA	T	PASS	intron_variant	MODIFIER	LOC111093245	111093245	transcript	XR_002621140.1	pseudogene	4	n.4716+6945_4716+6946delAA
29	15251260	C	T	PASS	intergenic_region	MODIFIER	LOC102154401-ARMC1	102154401-486974	intergenic_region	102154401-486974		-1	n.15251260C>T
29	15251276	T	C	PASS	intergenic_region	MODIFIER	LOC102154401-ARMC1	102154401-486974	intergenic_region	102154401-486974		-1	n.15251276T>C
29	15698735	A	G	GATKstd	intron_variant	MODIFIER	DNAJC5B	610015	transcript	XM_022412326.1	protein_coding	2	c.-9-5712A>G
29	15698735	A	G	GATKstd	intron_variant	MODIFIER	DNAJC5B	610015	transcript	XM_847397.5	protein_coding	2	c.-9-5712A>G
29	15698735	A	G	GATKstd	intron_variant	MODIFIER	DNAJC5B	610015	transcript	XM_022412328.1	protein_coding	2	c.-9-5712A>G
29	15698735	A	G	GATKstd	intron_variant	MODIFIER	DNAJC5B	610015	transcript	XM_022412327.1	protein_coding	2	c.-9-5712A>G
29	27788957	AGACAC	A	PASS	intergenic_region	MODIFIER	ZBTB10-LOC102157024	487014-102157024	intergenic_region	487014-102157024		-1	n.27788958_27788962delGACAC
29	40083025	C	T	PASS	intergenic_region	MODIFIER	LOC111093235-GDF6	111093235-100686579	intergenic_region	111093235-100686579		-1	n.40083025C>T
3	6777667	A	AT	PASS	intergenic_region	MODIFIER	LOC100685719-TRNAK-CUU	100685719-111095411	intergenic_region	100685719-111095411		-1	n.6777667_6777668insT
3	31563934	GGCAGGGGGTGGAGGTGA	G	PASS	intergenic_region	MODIFIER	COR6C40-LOC100683660	488678-100683660	intergenic_region	488678-100683660		-1	n.31563935_31563951delGCAGGGGGTGGAGGTGA
3	31592424	C	T	PASS	intergenic_region	MODIFIER	LOC100683660-COR6C63	100683660-491367	intergenic_region	100683660-491367		-1	n.31592424C>T
3	33317532	G	C	GATKstd	intron_variant	MODIFIER	GABRG3	488685	transcript	XM_545802.5	protein_coding	3	c.271-9366C>G
3	33317532	G	C	GATKstd	intron_variant	MODIFIER	LOC106558579	106558579	transcript	106558579	pseudogene	1	n.43+2149G>C
3	33317532	G	C	GATKstd	intron_variant	MODIFIER	GABRG3	488685	transcript	XM_014112291.2	protein_coding	3	c.271-9366C>G
3	33432434	A	C	GATKstd	intron_variant	MODIFIER	GABRG3	488685	transcript	XM_545802.5	protein_coding	3	c.271-124268T>G
3	33432434	A	C	GATKstd	intron_variant	MODIFIER	GABRG3	488685	transcript	XM_014112291.2	protein_coding	3	c.271-124268T>G
3	42379934	C	G	PASS	intergenic_region	MODIFIER	FAM169B-LOC111095362	608120-111095362	intergenic_region	608120-111095362		-1	n.42379934C>G
3	62272306	C	CA	PASS	intron_variant	MODIFIER	LETM1	488807	transcript	XM_005618526.3	protein_coding	1	c.80-685_80-684insA
3	62272306	C	CA	PASS	intron_variant	MODIFIER	LETM1	488807	transcript	XM_022417132.1	protein_coding	1	c.80-685_80-684insA
3	62272306	C	CA	PASS	intron_variant	MODIFIER	LETM1	488807	transcript	XM_022417133.1	protein_coding	1	c.80-685_80-684insA
3	67140309	A	AG	PASS	intron_variant	MODIFIER	LOC111095270	111095270	transcript	XR_002625289.1	pseudogene	3	n.330-4366_330-4365insC
3	67140309	A	AG	PASS	intron_variant	MODIFIER	LOC111095270	111095270	transcript	XR_002625290.1	pseudogene	2	n.235-4366_235-4365insC
3	67140330	G	T	PASS	intron_variant	MODIFIER	LOC111095270	111095270	transcript	XR_002625289.1	pseudogene	3	n.330-4386C>A
3	67140330	G	T	PASS	intron_variant	MODIFIER	LOC111095270	111095270	transcript	XR_002625290.1	pseudogene	2	n.235-4386C>A
3	69761224	AAGG	A	PASS	downstream_gene_variant	MODIFIER	ZBTB49	488826	transcript	XM_545944.5	protein_coding	-1	c.*5207_*5209delAGG
3	69761224	AAGG	A	PASS	downstream_gene_variant	MODIFIER	ZBTB49	488826	transcript	XM_005618580.3	protein_coding	-1	c.*5207_*5209delAGG
3	69761224	AAGG	A	PASS	downstream_gene_variant	MODIFIER	ZBTB49	488826	transcript	XM_022417180.1	protein_coding	-1	c.*5207_*5209delAGG
3	69761224	AAGG	A	PASS	downstream_gene_variant	MODIFIER	ZBTB49	488826	transcript	XM_022417181.1	protein_coding	-1	c.*5207_*5209delAGG
3	69761224	AAGG	A	PASS	downstream_gene_variant	MODIFIER	ZBTB49	488826	transcript	XM_005618581.3	protein_coding	-1	c.*5207_*5209delAGG
3	69761224	AAGG	A	PASS	intergenic_region	MODIFIER	ZBTB49-NSG1	488826-479096	intergenic_region	488826-479096		-1	n.69761225_69761227delAGG
3	72505444	C	T	PASS	intergenic_region	MODIFIER	TRNAK-CUU-PDS5A	111095413-479103	intergenic_region	111095413-479103		-1	n.72505444C>T
3	75807958	A	G	PASS	intron_variant	MODIFIER	ARAP2	488840	transcript	XM_014112643.2	protein_coding	28	c.4429-3711A>G
3	75807958	A	G	PASS	intron_variant	MODIFIER	ARAP2	488840	transcript	XM_022417256.1	protein_coding	27	c.4360-3711A>G
3	75807958	A	G	PASS	intron_variant	MODIFIER	ARAP2	488840	transcript	XM_014112645.2	protein_coding	23	c.2932-3711A>G
3	76433178	C	T	PASS	upstream_gene_variant	MODIFIER	LOC111095299	111095299	transcript	XR_002625356.1	pseudogene	-1	n.-4271G>A
3	76433178	C	T	PASS	downstream_gene_variant	MODIFIER	LOC111094923	111094923	transcript	111094923	pseudogene	-1	n.*1365C>T
3	76433178	C	T	PASS	intergenic_region	MODIFIER	LOC111094923-LOC100685369	111094923-100685369	intergenic_region	111094923-100685369		-1	n.76433178C>T
3	77041919	CCTTCCTTTCTTT	C	PASS	intergenic_region	MODIFIER	LOC111095392-LOC102153121	111095392-102153121	intergenic_region	111095392-102153121		-1	n.77041920_77041931delCTTCCTTTCTTT
3	77382303	G	A	PASS	intergenic_region	MODIFIER	LOC111095392-LOC102153121	111095392-102153121	intergenic_region	111095392-102153121		-1	n.77382303G>A
3	77562367	G	A	PASS	intergenic_region	MODIFIER	LOC111095392-LOC102153121	111095392-102153121	intergenic_region	111095392-102153121		-1	n.77562367G>A
3	77746521	A	G	PASS	downstream_gene_variant	MODIFIER	LOC100685522	100685522	transcript	100685522	pseudogene	-1	n.*4024A>G
3	77746521	A	G	PASS	intergenic_region	MODIFIER	LOC100685522-LOC100688652	100685522-100688652	intergenic_region	100685522-100688652		-1	n.77746521A>G
3	77879870	T	TA	PASS	intergenic_region	MODIFIER	LOC100685522-LOC100688652	100685522-100688652	intergenic_region	100685522-100688652		-1	n.77879870_77879871insA
3	77974771	A	G	PASS	intergenic_region	MODIFIER	LOC100688652-LOC111095393	100688652-111095393	intergenic_region	100688652-111095393		-1	n.77974771A>G
3	78023094	T	G	PASS	intergenic_region	MODIFIER	LOC100688652-LOC111095393	100688652-111095393	intergenic_region	100688652-111095393		-1	n.78023094T>G
3	78127545	C	T	PASS	intergenic_region	MODIFIER	LOC111095393-LOC100685608	111095393-100685608	intergenic_region	111095393-100685608		-1	n.78127545C>T
3	78128906	G	T	PASS	intergenic_region	MODIFIER	LOC111095393-LOC100685608	111095393-100685608	intergenic_region	111095393-100685608		-1	n.78128906G>T
3	79280476	G	T	PASS	intergenic_region	MODIFIER	LOC111095396-LOC111095397	111095396-111095397	intergenic_region	111095396-111095397		-1	n.79280476G>T
3	79605421	G	A	PASS	intergenic_region	MODIFIER	LOC111095396-LOC111095397	111095396-111095397	intergenic_region	111095396-111095397		-1	n.79605421G>A
3	80219550	A	C	PASS	intron_variant	MODIFIER	PCDH7	488843	transcript	XM_022417259.1	protein_coding	2	c.3271-23978T>G
3	80255797	G	A	PASS	upstream_gene_variant	MODIFIER	LOC102153238	102153238	transcript	XR_001315907.2	pseudogene	-1	n.-4293G>A
3	80255797	G	A	PASS	intron_variant	MODIFIER	PCDH7	488843	transcript	XM_022417259.1	protein_coding	2	c.3271-60225C>T
3	80298974	CA	C	PASS	upstream_gene_variant	MODIFIER	LOC102154941	102154941	transcript	102154941	pseudogene	-1	n.-3793delA
3	80298974	CA	C	PASS	intron_variant	MODIFIER	PCDH7	488843	transcript	XM_022417259.1	protein_coding	2	c.3270+63912delT
3	80387196	C	T	PASS	synonymous_variant	LOW	PCDH7	488843	transcript	XM_022417259.1	protein_coding	1	c.1701G>A	p.Arg567Arg
3	80389462	C	T	PASS	upstream_gene_variant	MODIFIER	PCDH7	488843	transcript	XM_022417259.1	protein_coding	-1	c.-566G>A
3	80389462	C	T	PASS	intergenic_region	MODIFIER	PCDH7-LOC100855743	488843-100855743	intergenic_region	488843-100855743		-1	n.80389462C>T
3	80400321	TTA	T	PASS	intergenic_region	MODIFIER	PCDH7-LOC100855743	488843-100855743	intergenic_region	488843-100855743		-1	n.80400322_80400323delTA
3	80606042	C	T	PASS	intergenic_region	MODIFIER	PCDH7-LOC100855743	488843-100855743	intergenic_region	488843-100855743		-1	n.80606042C>T
3	80884762	T	A	PASS	intergenic_region	MODIFIER	LOC111095301-LOC111095398	111095301-111095398	intergenic_region	111095301-111095398		-1	n.80884762T>A
3	81376823	GC	G	PASS	intergenic_region	MODIFIER	LOC111095301-LOC111095398	111095301-111095398	intergenic_region	111095301-111095398		-1	n.81376824delC
3	81376825	C	T	PASS	intergenic_region	MODIFIER	LOC111095301-LOC111095398	111095301-111095398	intergenic_region	111095301-111095398		-1	n.81376825C>T
3	81396012	G	T	PASS	intergenic_region	MODIFIER	LOC111095301-LOC111095398	111095301-111095398	intergenic_region	111095301-111095398		-1	n.81396012G>T
3	81708671	C	T	PASS	intergenic_region	MODIFIER	LOC111095301-LOC111095398	111095301-111095398	intergenic_region	111095301-111095398		-1	n.81708671C>T
3	82295205	A	T	PASS	intergenic_region	MODIFIER	LOC111095303-LOC111095399	111095303-111095399	intergenic_region	111095303-111095399		-1	n.82295205A>T
30	870308	C	T	PASS	intron_variant	MODIFIER	KATNBL1	607369	transcript	XM_844005.5	protein_coding	1	c.-15+4752C>T
30	870308	C	T	PASS	intron_variant	MODIFIER	KATNBL1	607369	transcript	XM_022412583.1	protein_coding	1	c.-15+4752C>T
30	1001726	A	G	PASS	downstream_gene_variant	MODIFIER	LOC111093276	111093276	transcript	XR_002621181.1	pseudogene	-1	n.*1430A>G
30	1001726	A	G	PASS	intron_variant	MODIFIER	CHRM5	487472	transcript	XM_005638189.3	protein_coding	2	c.-68-9852T>C
30	1001726	A	G	PASS	intron_variant	MODIFIER	AVEN	478243	transcript	XM_014109358.2	protein_coding	1	c.24+922A>G
30	1001726	A	G	PASS	intron_variant	MODIFIER	CHRM5	487472	transcript	XM_022412543.1	protein_coding	1	c.-69+2643T>C
30	1001726	A	G	PASS	intron_variant	MODIFIER	CHRM5	487472	transcript	XM_005638190.3	protein_coding	2	c.-68-9852T>C
30	7995373	A	AGAAAGAAAGAAAGAAAGAAAG	PASS	intergenic_region	MODIFIER	SPINT1-RHOV	487501-487502	intergenic_region	487501-487502		-1	n.7995373_7995374insGAAAGAAAGAAAGAAAGAAAG
30	10050900	G	A	PASS	upstream_gene_variant	MODIFIER	CCNDBP1	607896	transcript	XM_005638322.3	protein_coding	-1	c.-2898G>A
30	10050900	G	A	PASS	intron_variant	MODIFIER	TMEM62	478271	transcript	XM_014109464.2	protein_coding	14	c.1668+797G>A
30	10050900	G	A	PASS	intron_variant	MODIFIER	TMEM62	478271	transcript	XM_014109465.2	protein_coding	13	c.1392+797G>A
30	10050900	G	A	PASS	intron_variant	MODIFIER	TMEM62	478271	transcript	XM_014109466.2	protein_coding	13	c.1278+797G>A
30	10050900	G	A	PASS	intron_variant	MODIFIER	TMEM62	478271	transcript	XM_535445.6	protein_coding	13	c.1605+797G>A
30	10050900	G	A	PASS	intron_variant	MODIFIER	TMEM62	478271	transcript	XM_022412912.1	protein_coding	13	c.1278+797G>A
30	10298212	C	G	PASS	intron_variant	MODIFIER	TP53BP1	478274	transcript	XM_844681.5	protein_coding	13	c.2714-193G>C
30	10298212	C	G	PASS	intron_variant	MODIFIER	TP53BP1	478274	transcript	XM_014109400.2	protein_coding	13	c.2699-193G>C
30	10298212	C	G	PASS	intron_variant	MODIFIER	TP53BP1	478274	transcript	XM_014109402.2	protein_coding	13	c.2714-1062G>C
30	10298212	C	G	PASS	intron_variant	MODIFIER	TP53BP1	478274	transcript	XM_022413015.1	protein_coding	13	c.2714-193G>C
30	10298212	C	G	PASS	intron_variant	MODIFIER	TP53BP1	478274	transcript	XM_005638338.3	protein_coding	12	c.2699-193G>C
30	10298212	C	G	PASS	intron_variant	MODIFIER	TP53BP1	478274	transcript	XM_022413017.1	protein_coding	13	c.2714-193G>C
30	10298212	C	G	PASS	intron_variant	MODIFIER	TP53BP1	478274	transcript	XR_001314896.2	pseudogene	13	n.3036-193G>C
30	10298212	C	G	PASS	intron_variant	MODIFIER	TP53BP1	478274	transcript	XR_002621529.1	pseudogene	13	n.3037-193G>C
30	11159757	T	C	PASS	intron_variant	MODIFIER	LOC111093274	111093274	transcript	XR_002621178.1	pseudogene	3	n.904+22356A>G
30	11159757	T	C	PASS	intron_variant	MODIFIER	CTDSPL2	487531	transcript	XM_005638357.3	protein_coding	3	c.187-182T>C
30	11159757	T	C	PASS	intron_variant	MODIFIER	CTDSPL2	487531	transcript	XM_005638361.3	protein_coding	2	c.187-182T>C
30	11159757	T	C	PASS	intron_variant	MODIFIER	CTDSPL2	487531	transcript	XM_005638359.3	protein_coding	2	c.187-182T>C
30	11159757	T	C	PASS	intron_variant	MODIFIER	CTDSPL2	487531	transcript	XM_855561.5	protein_coding	2	c.187-182T>C
30	11159757	T	C	PASS	intron_variant	MODIFIER	CTDSPL2	487531	transcript	XM_022412542.1	protein_coding	2	c.187-182T>C
30	11159757	T	C	PASS	intron_variant	MODIFIER	CTDSPL2	487531	transcript	XM_005638360.3	protein_coding	2	c.187-182T>C
30	11335596	C	T	PASS	missense_variant	MODERATE	B2M	100855741	transcript	NM_001284479.1	protein_coding	2	c.319C>T	p.Arg107Cys
30	11335596	C	T	PASS	missense_variant	MODERATE	B2M	100855741	transcript	XM_003640047.2	protein_coding	2	c.319C>T	p.Arg107Cys
30	11381167	A	T	PASS	intron_variant	MODIFIER	LOC111093295	111093295	transcript	XR_002621240.1	pseudogene	1	n.129-19559T>A
30	11381167	A	T	PASS	intron_variant	MODIFIER	TRIM69	478285	transcript	XM_535459.6	protein_coding	1	c.7-4258A>T
30	11381167	A	T	PASS	intron_variant	MODIFIER	TRIM69	478285	transcript	XM_005638364.3	protein_coding	1	c.7-4258A>T
30	11381167	A	T	PASS	intron_variant	MODIFIER	TRIM69	478285	transcript	XM_005638365.3	protein_coding	1	c.7-4258A>T
30	11381167	A	T	PASS	intron_variant	MODIFIER	TRIM69	478285	transcript	XM_022412637.1	protein_coding	1	c.-150-4258A>T
30	12884892	G	A	PASS	intergenic_region	MODIFIER	LOC102152321-LOC100686440	102152321-100686440	intergenic_region	102152321-100686440		-1	n.12884892G>A
30	13254149	A	T	PASS	intergenic_region	MODIFIER	LOC100686440-LOC100684619	100686440-100684619	intergenic_region	100686440-100684619		-1	n.13254149A>T
30	13254165	G	C	PASS	intergenic_region	MODIFIER	LOC100686440-LOC100684619	100686440-100684619	intergenic_region	100686440-100684619		-1	n.13254165G>C
30	13254166	G	C	PASS	intergenic_region	MODIFIER	LOC100686440-LOC100684619	100686440-100684619	intergenic_region	100686440-100684619		-1	n.13254166G>C
30	13254170	A	T	PASS	intergenic_region	MODIFIER	LOC100686440-LOC100684619	100686440-100684619	intergenic_region	100686440-100684619		-1	n.13254170A>T
30	13719974	TTTTATATATATATATATATATATATATATATATAA	T	PASS	intron_variant	MODIFIER	SEMA6D	100855988	transcript	XM_022413042.1	protein_coding	2	c.-159-30837_-159-30803delTTTATATATATATATATATATATATATATATATAA
30	13722117	C	T	PASS	intron_variant	MODIFIER	SEMA6D	100855988	transcript	XM_022413042.1	protein_coding	2	c.-159-28695C>T
30	16807418	GCAGAAACTAAGCAGAGTTGACAAAAAGTCGTAATCTTTCCTCTGTCCCTTTCTTTT	G	PASS	intergenic_region	MODIFIER	AP4E1-TNFAIP8L3	478304-487552	intergenic_region	478304-487552		-1	n.16807419_16807474delCAGAAACTAAGCAGAGTTGACAAAAAGTCGTAATCTTTCCTCTGTCCCTTTCTTTT
30	17921817	TTTTA	T	PASS	intron_variant	MODIFIER	MYO5C	487555	transcript	XM_022412657.1	protein_coding	24	c.3231+935_3231+938delTAAA
30	18004549	G	GT	PASS	frameshift_variant	HIGH	MYO5A	478312	transcript	XM_022412522.1	protein_coding	38	c.4973dupA	p.Asn1658fs
30	18391293	C	A	PASS	intron_variant	MODIFIER	ONECUT1	487558	transcript	XM_846134.5	protein_coding	1	c.1106-2609G>T
30	19873926	T	TTTTTTTA	PASS	intron_variant	MODIFIER	UNC13C	487564	transcript	XM_022412685.1	protein_coding	19	c.4723-20436_4723-20435insTTTTTTA
30	19873926	T	TTTTTTTA	PASS	intron_variant	MODIFIER	UNC13C	487564	transcript	XM_022412690.1	protein_coding	18	c.4717-20436_4717-20435insTTTTTTA
30	19873926	T	TTTTTTTA	PASS	intron_variant	MODIFIER	UNC13C	487564	transcript	XM_022412691.1	protein_coding	18	c.4717-20436_4717-20435insTTTTTTA
30	19873926	T	TTTTTTTA	PASS	intron_variant	MODIFIER	UNC13C	487564	transcript	XM_022412686.1	protein_coding	19	c.4723-20436_4723-20435insTTTTTTA
30	19873926	T	TTTTTTTA	PASS	intron_variant	MODIFIER	UNC13C	487564	transcript	XM_022412687.1	protein_coding	20	c.4723-20436_4723-20435insTTTTTTA
30	19873926	T	TTTTTTTA	PASS	intron_variant	MODIFIER	UNC13C	487564	transcript	XM_022412688.1	protein_coding	18	c.4723-20436_4723-20435insTTTTTTA
30	19873926	T	TTTTTTTA	PASS	intron_variant	MODIFIER	UNC13C	487564	transcript	XM_022412689.1	protein_coding	18	c.4723-20436_4723-20435insTTTTTTA
30	19873926	T	TTTTTTTA	PASS	intron_variant	MODIFIER	UNC13C	487564	transcript	XM_014109625.2	protein_coding	19	c.4723-20436_4723-20435insTTTTTTA
30	20058677	G	A	PASS	intron_variant	MODIFIER	UNC13C	487564	transcript	XM_022412685.1	protein_coding	33	c.6145+22067G>A
30	20058677	G	A	PASS	intron_variant	MODIFIER	UNC13C	487564	transcript	XM_022412690.1	protein_coding	32	c.6139+22067G>A
30	20058677	G	A	PASS	intron_variant	MODIFIER	UNC13C	487564	transcript	XM_022412691.1	protein_coding	31	c.6109+22067G>A
30	20058677	G	A	PASS	intron_variant	MODIFIER	UNC13C	487564	transcript	XM_022412686.1	protein_coding	33	c.6145+22067G>A
30	20058677	G	A	PASS	intron_variant	MODIFIER	UNC13C	487564	transcript	XM_022412687.1	protein_coding	34	c.6145+22067G>A
30	20058677	G	A	PASS	intron_variant	MODIFIER	UNC13C	487564	transcript	XM_022412688.1	protein_coding	32	c.6145+22067G>A
30	20058677	G	A	PASS	intron_variant	MODIFIER	UNC13C	487564	transcript	XM_022412689.1	protein_coding	32	c.6145+22067G>A
30	20058677	G	A	PASS	intron_variant	MODIFIER	UNC13C	487564	transcript	XM_014109625.2	protein_coding	32	c.6115+22067G>A
30	20095396	TG	T	PASS	3_prime_UTR_variant	MODIFIER	UNC13C	487564	transcript	XM_022412685.1	protein_coding	36	c.*304delG
30	20095396	TG	T	PASS	3_prime_UTR_variant	MODIFIER	UNC13C	487564	transcript	XM_022412690.1	protein_coding	35	c.*304delG
30	20095396	TG	T	PASS	3_prime_UTR_variant	MODIFIER	UNC13C	487564	transcript	XM_022412686.1	protein_coding	36	c.*304delG
30	20095396	TG	T	PASS	3_prime_UTR_variant	MODIFIER	UNC13C	487564	transcript	XM_022412687.1	protein_coding	37	c.*304delG
30	20095396	TG	T	PASS	3_prime_UTR_variant	MODIFIER	UNC13C	487564	transcript	XM_022412688.1	protein_coding	35	c.*304delG
30	20095396	TG	T	PASS	3_prime_UTR_variant	MODIFIER	UNC13C	487564	transcript	XM_022412689.1	protein_coding	35	c.*304delG
30	20095396	TG	T	PASS	downstream_gene_variant	MODIFIER	UNC13C	487564	transcript	XM_022412691.1	protein_coding	-1	c.*303delG
30	20095396	TG	T	PASS	downstream_gene_variant	MODIFIER	UNC13C	487564	transcript	XM_014109625.2	protein_coding	-1	c.*303delG
30	20359638	A	G	PASS	intergenic_region	MODIFIER	UNC13C-LOC102152774	487564-102152774	intergenic_region	487564-102152774		-1	n.20359638A>G
30	20470338	A	G	PASS	intergenic_region	MODIFIER	LOC102152774-LOC111093374	102152774-111093374	intergenic_region	102152774-111093374		-1	n.20470338A>G
30	20791638	C	T	PASS	upstream_gene_variant	MODIFIER	C30H15orf65	106558053	transcript	XM_022412523.1	protein_coding	-1	c.-3386C>T
30	20791638	C	T	PASS	intron_variant	MODIFIER	CCPG1	487566	transcript	XM_544691.6	protein_coding	1	c.-10+3777G>A
30	20791638	C	T	PASS	intron_variant	MODIFIER	DNAAF4	487567	transcript	XM_022412647.1	protein_coding	9	c.*20-13073G>A
30	20796651	T	A	PASS	upstream_gene_variant	MODIFIER	CCPG1	487566	transcript	XM_544691.6	protein_coding	-1	c.-18095A>T
30	20796651	T	A	PASS	downstream_gene_variant	MODIFIER	DNAAF4	487567	transcript	XM_014109447.2	protein_coding	-1	c.*19284A>T
30	20796651	T	A	PASS	intron_variant	MODIFIER	C30H15orf65	106558053	transcript	XM_022412523.1	protein_coding	2	c.858+678T>A
30	20796651	T	A	PASS	intron_variant	MODIFIER	DNAAF4	487567	transcript	XM_022412647.1	protein_coding	9	c.*20-18086A>T
30	21499881	G	A	PASS	intron_variant	MODIFIER	TEX9	487572	transcript	XM_022412550.1	protein_coding	1	c.27+47854G>A
30	21684950	G	GGC	PASS	upstream_gene_variant	MODIFIER	MNS1	478314	transcript	XM_022412549.1	protein_coding	-1	c.-2413_-2412insGC
30	21684950	G	GGC	PASS	upstream_gene_variant	MODIFIER	LOC111093350	111093350	transcript	XR_002621405.1	pseudogene	-1	n.-1200_-1199insGC
30	21684950	G	GGC	PASS	intergenic_region	MODIFIER	MNS1-LOC111093350	478314-111093350	intergenic_region	478314-111093350		-1	n.21684950_21684951insGC
30	21735559	A	G	PASS	intergenic_region	MODIFIER	LOC111093350-ZNF280D	111093350-478315	intergenic_region	111093350-478315		-1	n.21735559A>G
30	23003804	C	T	PASS	intergenic_region	MODIFIER	POLR2M-ALDH1A2	478318-478319	intergenic_region	478318-478319		-1	n.23003804C>T
30	23943943	T	C	GATKstd	intron_variant	MODIFIER	RNF111	478323	transcript	XM_005638458.3	protein_coding	1	c.-20+9422T>C
30	23943943	T	C	GATKstd	intron_variant	MODIFIER	RNF111	478323	transcript	XM_005638459.3	protein_coding	1	c.-20+9084T>C
30	23993184	T	C	GATKstd	intron_variant	MODIFIER	RNF111	478323	transcript	XM_005638458.3	protein_coding	3	c.1007+2107T>C
30	23993184	T	C	GATKstd	intron_variant	MODIFIER	RNF111	478323	transcript	XM_005638459.3	protein_coding	3	c.1007+2107T>C
30	23993184	T	C	GATKstd	intron_variant	MODIFIER	RNF111	478323	transcript	XM_005638461.3	protein_coding	3	c.1007+2107T>C
30	23993184	T	C	GATKstd	intron_variant	MODIFIER	RNF111	478323	transcript	XM_022412916.1	protein_coding	2	c.1007+2107T>C
30	23993184	T	C	GATKstd	intron_variant	MODIFIER	RNF111	478323	transcript	XM_022412917.1	protein_coding	2	c.1007+2107T>C
30	23993184	T	C	GATKstd	intron_variant	MODIFIER	RNF111	478323	transcript	XM_022412918.1	protein_coding	2	c.1007+2107T>C
30	23993184	T	C	GATKstd	intron_variant	MODIFIER	RNF111	478323	transcript	XM_022412920.1	protein_coding	2	c.1007+2107T>C
30	23993184	T	C	GATKstd	intron_variant	MODIFIER	RNF111	478323	transcript	XM_022412921.1	protein_coding	2	c.1007+2107T>C
30	24057191	T	A	GATKstd	intron_variant	MODIFIER	CCNB2	478324	transcript	NM_001313810.1	protein_coding	7	c.972+544T>A
30	24107389	C	G	GATKstd	intron_variant	MODIFIER	MYO1E	478325	transcript	XM_535500.6	protein_coding	18	c.1905-2702G>C
30	24188317	T	C	GATKstd	intron_variant	MODIFIER	MYO1E	478325	transcript	XM_535500.6	protein_coding	1	c.4-1144A>G
30	25879339	CA	C	PASS	intron_variant	MODIFIER	RORA	478328	transcript	XM_535503.7	protein_coding	1	c.166+147118delT
30	26722037	G	A	PASS	intron_variant	MODIFIER	VPS13C	487586	transcript	XM_005638475.3	protein_coding	16	c.1354-2338C>T
30	26722037	G	A	PASS	intron_variant	MODIFIER	VPS13C	487586	transcript	XM_005638476.3	protein_coding	14	c.1225-2338C>T
30	26722037	G	A	PASS	intron_variant	MODIFIER	VPS13C	487586	transcript	XR_002621455.1	pseudogene	16	n.1433-2338C>T
30	26722037	G	A	PASS	intron_variant	MODIFIER	VPS13C	487586	transcript	XR_002621453.1	pseudogene	16	n.1433-2338C>T
30	26722037	G	A	PASS	intron_variant	MODIFIER	VPS13C	487586	transcript	XR_002621454.1	pseudogene	16	n.1433-2338C>T
30	26722037	G	A	PASS	intron_variant	MODIFIER	VPS13C	487586	transcript	XR_002621456.1	pseudogene	16	n.1433-2338C>T
30	27949430	G	GT	PASS	intron_variant	MODIFIER	CA12	478333	transcript	XM_535507.6	protein_coding	2	c.106+2928_106+2929insA
[truncated: 1,500 more rows]
